# Multidimensional single-cell benchmarking of inducible promoters for precise dynamic control in budding yeast

Vojislav Gligorovski<sup>1</sup>, Ahmad Sadeghi<sup>1</sup>, Sahand Jamal Rahi<sup>1</sup>

<sup>1</sup> Laboratory of the Physics of Biological Systems, Institute of Physics, École polytechnique fédérale de Lausanne (EPFL), Lausanne, Switzerland

## Abstract

For quantitative systems biology, simultaneous readout of multiple cellular processes as well as precise, independent control over different genes' activities are essential. In contrast to readout systems such as fluorescent proteins, control systems such as inducible transcription-factor-promoter systems have only been characterized in an *ad hoc* fashion, impeding precise system-level manipulations of biological systems and reliable modeling.

We designed and performed systematic benchmarks involving easy-to-communicate units to characterize and compare inducible transcriptional systems. We built a comprehensive single-copy library of inducible systems controlling standardized fluorescent protein expression in budding yeast, including *GAL1pr*, *GALL*, *MET3pr*, *CUP1pr*, *PHO5pr*, *tetOpr*, *terminator-tetOpr*, Z<sub>3</sub>EV system, the blue-light optogenetic systems E1222-*LIP*, E1222-*GLIP* and the red-light inducible PhyB-PIF3 system. To analyze these systems' dynamic properties, we performed high-throughput time-lapse microscopy. The analysis of >100 000 cell images was made possible by the recently developed convolutional neural network YeaZ. We report key kinetic parameters, scaling of noise levels, impacts on growth, and, crucially, the fundamental leakiness of each system. Our multidimensional benchmarking additionally uncovers unexpected disadvantages of widely used tools, e.g., nonmonotonic activity of the *MET3* and *GALL* promoters, slow off kinetics of the doxycycline and estradiol-inducible systems *tetOpr* and Z<sub>3</sub>EV, and high variability of *PHO5pr* and red-light activated PhyB-PIF3 system. We introduce two new tools for controlling gene expression: strongLOV, a more light-sensitive E1222 mutant, and *ARG3pr* that functions as an OR gate induced by the lack of arginine or presence of methionine. To demonstrate the ability to finely control genetic circuits, we experimentally tuned the time between cell cycle Start and mitotic entry in budding yeast, artificially simulating near-wild-type timing.

The characterizations presented here define the compromises that need to be made for quantitative experiments in systems and synthetic biology. To calibrate perturbations across laboratories and to allow new inducible systems to be benchmarked, we deposited single-copy reporter yeast strains, plasmids, and computer analysis code in public repositories. Furthermore, this resource can be accessed and expanded through the website <https://promoter-benchmark.epfl.ch/>.

## 34 Introduction

35 Control over the level and timing of gene activity does not only offer advantages over more traditional  
36 genetics approaches such as gene knockouts or constitutive overexpression but is indispensable for many  
37 applications. In particular, understanding system-level properties and constructing artificial cellular  
38 behaviors frequently require the independent, temporally precise, and reversible manipulation of different  
39 nodes in a genetic network. As a result, inducible expression systems and their characterization are critical  
40 for advances in systems and synthetic biology.

41 Inducible systems are widely used in systems biology for studying the dynamics, topology, and  
42 stochasticity of genetic networks.<sup>1-3</sup> For example, 1 sec long pulses of light were used to recruit the proteins  
43 that control the site of budding<sup>4</sup>; 5 min galactose induction was used to express double-strand DNA break-  
44 inducing endonucleases.<sup>5</sup> In metabolic engineering, inducible systems are employed for the reversible  
45 activation of biosynthetic pathways at specific stages of growth or for fine-tuning activation levels.<sup>6-8</sup>  
46 Reversible activation of gene activity is also needed in synthetic biology for the construction of switchable  
47 logic circuits<sup>9,10</sup> or to reduce the toxic effects of specific gene products<sup>11</sup>.

48 Exogenous regulation of gene expression in eukaryotes can in principle be introduced at different  
49 stages, the transcriptional or translational level as well as at the posttranslational level by controlling  
50 protein-protein interactions or protein degradation.<sup>12,13</sup> In *Saccharomyces cerevisiae*, a widely used  
51 organism in research and industry, the most common way of tuning the level of gene expression is by  
52 regulating transcription.<sup>14</sup> Moreover, the majority of the tools for manipulating gene expression have been  
53 engineered for yeasts.<sup>15</sup> This is why we focus on inducible transcriptional systems here.

54 Many commonly used inducible transcriptional systems in budding yeast are regulated by small  
55 metabolites such as galactose, methionine, or copper<sup>16</sup>. Using nutrients to control gene expression has the  
56 advantage that the relevant transcription factors are already present in cells and have been fine-tuned over  
57 the course of the evolution. On the other hand, the drawback is that changes in nutrient levels generally  
58 also affect metabolism. To avoid this, synthetic systems have been created which respond to compounds  
59 not naturally present in the host. In addition to tetracycline-regulated transcription factors<sup>17</sup>, several  
60 systems that are estradiol-inducible have been constructed for budding yeast<sup>18-20</sup>, such as the Z<sub>3</sub>EV system.  
61 While synthetic systems are usually orthogonal to cell physiology, they can nevertheless have an effect  
62 on cellular growth, for example, due to the toxicity of the inducer. More recently, light sensors from  
63 bacteria and plants have been adapted for use as transcriptional control systems in budding yeast<sup>21</sup>. In  
64 contrast to the other systems for manipulating cellular processes, light provides a rapid, noninvasive, and  
65 convenient means of control<sup>22</sup>.

66 For precise control of gene activity, inducible systems should ideally have fast kinetics, high  
67 dynamic range, low basal activity (leakiness), and low noise. Leakiness is a poorly characterized but crucial  
68 property since for many applications it is essential to be able to turn expression truly 'off'. Leakiness is  
69 particularly important when controlling genes that are toxic or cause changes to the genome such as  
70 Cas9<sup>23</sup>, Cre-loxP<sup>11</sup>, or Ho<sup>24</sup> endonuclease. However, for inducible systems, most of these properties have  
71 either not been assessed precisely, not in a manner that would allow their direct comparison, or have not  
72 been determined at all. Although new inducible systems are being developed,<sup>18,19,25-28</sup> a standard  
73 benchmark for rigorous evaluation of their properties does not exist. Due to the absence of standardized  
74 quantitative descriptions, the choice of inducible systems is usually guided by intuition or time-consuming  
75 trial and error. The lack of such benchmarks for controlling cellular behavior stands in contrast to existing  
76 thorough characterizations of readout systems such as fluorescent proteins.<sup>30-33</sup>

Figure 1. Measurement noise is substantially higher in flow cytometry compared to fluorescence microscopy. A: Flow cytometry measurements of cells with a *GAL1pr-yEVENUS-PEST* construct and wild-type control cells in inducing galactose medium (COV: coefficient of variation). B: Increasing the excitation laser intensity even up to the saturation point of the sensor ( $2^{20} \approx 1.05 \cdot 10^6$ ) does not substantially reduce the COV. C: Fluorescence microscopy measurements of the same cells. COV is calculated for all cells with the *GAL1pr-yEVENUS-PEST* construct (no gating was applied). A, B: COV is calculated for the induced *GAL1pr-yEVENUS-PEST* population, which is defined by fluorescence values higher than the threshold indicated by the blue vertical line. A, B, C: Data is shown on a logarithmic scale but the COV is computed based on non-transformed values. B, C:  $p = 7.8e-15$  (one-tailed z-test for significance of COV differences between induced populations in B and C panels).

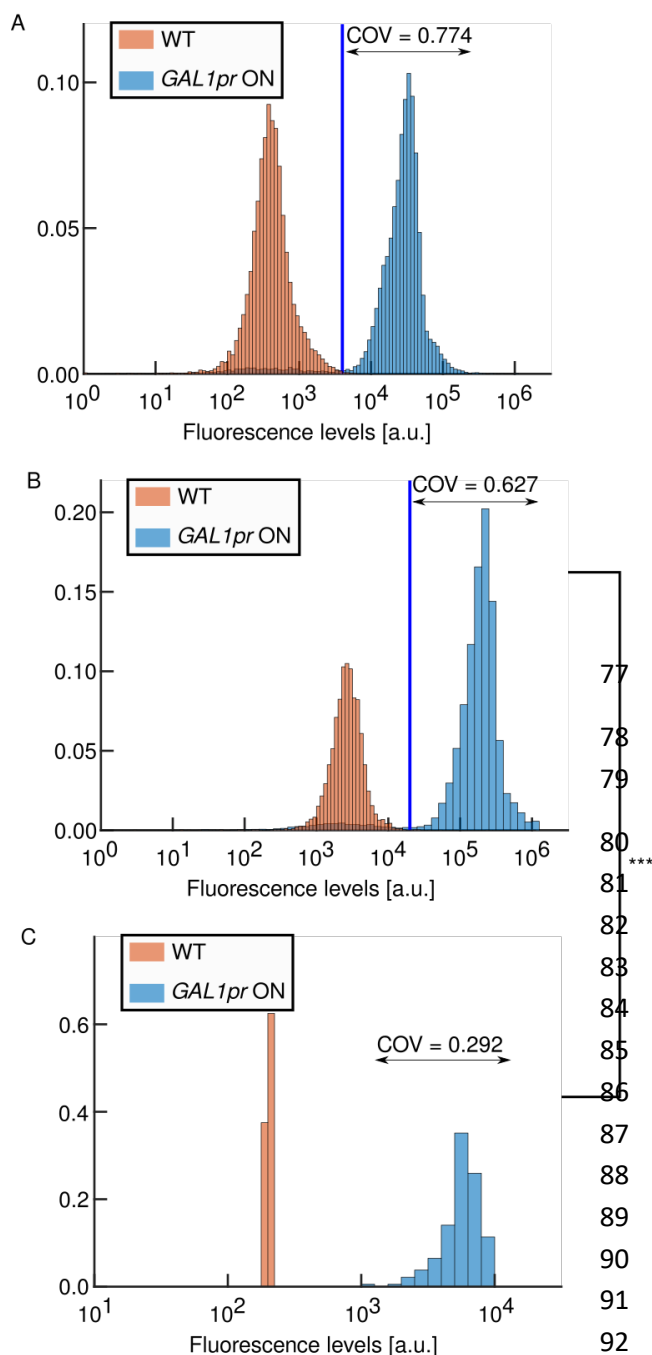

77  
78 There are multiple technical challenges for  
79 characterizing inducible systems quantitatively:

80 1) Single-cell time courses need to be  
81 recorded by fluorescence microscopy and analyzed.  
82 For this to be feasible with sufficient numbers of  
83 cells, a highly efficient and accurate segmentation  
84 method such as the newly developed convolutional  
85 neural network YeaZ<sup>34</sup> was needed, which we used  
86 to analyze >100000 yeast cell images. Population  
87 snapshots by flow cytometry do not suffice for  
88 reconstructing single-cell time courses  
89 unambiguously. Moreover, flow cytometry has  
90 substantially higher levels of measurement noise  
91 and thus overestimates the true expression  
92 stochasticity<sup>35</sup> compared to fluorescence microscopy

93  
94  
95  
96

(Fig. 1).

2) To allow comparisons, all reporters for the inducible systems must be designed uniformly, e.g., introduced at the same genomic locus and in the same number of copies. Here, we ensure that each reporter is introduced as a single copy at the same locus (*URA3*).

- 97 3) Additionally, to measure absolute characteristics, the absolute copy numbers of the reporter  
98 systems in each cell must be fixed. Our single-copy reporters allow us to measure the  
99 fundamental characteristics of the inducible transcriptional system such as their minimal  
100 leakiness.
- 101 4) Fluorescence levels are often reported in ‘arbitrary units’ (*AU*), which differ among  
102 fluorescent proteins and microscopes, making measurements difficult to compare between  
103 different laboratories. To overcome this limitation, we calibrated all fluorescence units to an  
104 easy-to-communicate reference unit, “peak *GAL1pr* expression” (maxGAL1), whose  
105 intuitiveness makes it appealing as a practical unit for measuring gene induction levels. Thus,  
106 we avoid the difficulty of quantifying expression in terms of absolute protein numbers but  
107 instead normalize all levels to a very well-known expression system, which could therefore  
108 serve as a universal expression unit.

109 Here, we present:

- 110 1) a single-cell based characterization of new as well as widely used inducible systems,  
111 identifying several noteworthy features of these systems,
- 112 2) the extraction of key parameters from the time courses: on time lag, off time lag, induction  
113 speed and strength, noise levels, and leakiness,
- 114 3) their population-level averages and cell-to-cell variability,
- 115 4) strongLOV, a new mutant of the light-inducible transcription factor El222 with higher light  
116 sensitivity,
- 117 5) an analysis of the *ARG3* promoter for potential use as an inducible system,
- 118 6) a demonstration of how these data enable fine experimental tuning by timing successive cell-  
119 cycle transitions with close-to-wild-type timing,
- 120 7) computer code, budding yeast strains, and plasmids to allow the benchmark to be applied to  
121 future inducible systems and to calibrate measurements across laboratories, and
- 122 8) the website promoter-benchmark.epfl.ch to make the benchmark extendable and all data  
123 easily accessible.

124

125

## 126 Results

### 127 Selection of inducible transcriptional systems

128 The galactose regulon has been utilized for many decades to control gene expression with *GAL1pr*  
129 potentially being the most widely used inducible promoter in budding yeast<sup>36,37</sup>. *GAL1pr* is tightly  
130 repressed in the presence of glucose by the Gal80 and Mig1 repressors<sup>38</sup>. In the presence of galactose,  
131 *GAL1pr* is induced more than 1000-fold<sup>39</sup>. Glucose repression induces transcriptional downregulation of  
132 *GAL* regulatory genes. To avoid delays when switching from glucose to galactose, cells are typically grown  
133 in non-inducing and non-repressing raffinose medium. Because *GAL1pr* is too strong for many  
134 applications when induced, a weakened version, *GALL*, was developed.<sup>40</sup>

135 *MET3* was discovered through a screen for methionine auxotrophy in yeast<sup>41</sup>. Met3 is an ATP-  
136 sulfurylase which catalyzes the first step in the sulfur assimilation pathway.<sup>42</sup> Its transcription is strongly

137 repressed in methionine-rich media<sup>42</sup>. It is commonly used to control the expression of budding yeast  
138 genes whose transcription levels are lower than *GAL1pr*. For example, the continuous expression of G1/S  
139 budding yeast cyclin *CLN2*, whose promoter is comparable in strength to *MET3pr*<sup>43</sup>, from a *MET3pr-CLN2*  
140 construct in a *cln1,2,3Δ* background causes almost no discernable effects in cell-cycle timing and cellular  
141 morphology<sup>44,45</sup>. In contrast, overexpression of *CLN2* from *GAL1pr* in the same genetic background slows  
142 down the cell cycle<sup>46</sup> and in the wild-type background produces cells with elongated buds<sup>47</sup>.

143 *CUP1* is part of a feedback loop that mediates resistance to copper toxicity. Its transcription  
144 increases when cells are exposed to copper (II) ions.<sup>48</sup> Although *CUP1pr* has been used as a tool for dynamic  
145 gene expression control, it has the fundamental drawback of being regulated by copper ions, which are  
146 both essential and, if supplied at high concentrations, toxic.<sup>49</sup>

147 *PHO5pr* is a member of the *PHO* regulon, which has been researched intensively as a model for  
148 studying the relationship between chromatin structure and gene expression dynamics<sup>50</sup>. *PHO5pr* is  
149 upregulated in response to a lack of inorganic phosphate<sup>51</sup>, which is required for energy and nucleotide  
150 metabolism. The *PHO5* promoter becomes fully active after phosphate, including any stored in the  
151 vacuole, is used up<sup>52</sup>.

152 Tetracycline-responsive systems are widely used for controlling transcription. The core of the  
153 system, the *tetO* sequence, is controlled by the tTA regulator, which has been identified as a tetracycline-  
154 responsive element in bacteria. In its original form, tTA is part of the Tet-Off system that is inhibited by  
155 the antibiotic tetracycline or the closely related molecule doxycycline. The mutations that reverse tTA  
156 activity with respect to the inducer have been identified. However, this system, called the Tet-On system,  
157 exhibits high basal activity in the absence of the inducer<sup>53</sup>.

158 Several other synthetic systems, which are estradiol-inducible, have also been constructed for  
159 budding yeast<sup>18-20</sup>, such as the Z<sub>3</sub>EV system. Z<sub>3</sub>EV is a transcription factor in which the estradiol receptor  
160 is fused to the DNA binding domain of the mouse transcription factor Zif268 and the transcriptional  
161 activation domain VP16. One of the main advantages of using artificial transcription factors is that they  
162 can be designed to recognize comparatively long DNA motifs, thereby reducing off-target binding<sup>20</sup>. While  
163 synthetic systems are usually orthogonal to cellular physiology, they can nevertheless have an effect on  
164 cellular growth due to off-target effects or the toxicity of the inducer, for example.

165 The first light-regulated transcriptional system used in budding yeast was derived from a plant  
166 phytochrome and consists of the protein PhyB (Phytochrome B) and its interaction partner, PIF3  
167 (Phytochrome-Interacting Factor 3) protein.<sup>54</sup> While it paved the way toward optogenetic control of  
168 cellular processes, PhyB-PIF3 has the disadvantage that it requires the exogenous addition of the  
169 chromophore phycocyanobilin (PCB), which is not produced by most eukaryotes other than plants. For  
170 transcriptional control, PhyB and PIF3 are fused to the Gal4 transcriptional activation domain and the  
171 Gal4 DNA binding domain, respectively<sup>54,55</sup>. When bound to PCB and activated by red light ( $\approx$  650 nm)  
172 PhyB binds PIF3, thereby bringing the transcriptional activation and DNA binding domains close and  
173 leading to the expression of the *GAL* family of genes such as *GAL1pr*. In the presence of far-red light ( $\approx$   
174 740 nm), PhyB changes conformation again and dissociates from PIF3. Since the spectra of activating and  
175 deactivating light overlap, PhyB is maintained in a dynamic equilibrium between the two states whose  
176 ratio depends on the wavelengths of the light.<sup>56</sup> In addition to the disadvantage of requiring exogenous  
177 PCB, the system also affects galactose metabolism in budding yeast when used for transcriptional  
178 induction with the split Gal4 transcription factor.

179 A popular system that overcomes some of the limitations of the PhyB-PIF3 system is the blue-  
180 light inducible El222 transcription factor. This prokaryotic LOV-domain photosensor has been adapted  
181 for use in many organisms such as yeast, zebrafish, and mammalian cell lines<sup>6,57,58</sup> by fusing it to the  
182 transcriptional activation domain VP16 and a nuclear localization sequence. When exposed to blue light  
183 ( $\approx 465$  nm), El222 dimerizes and recognizes its binding sites. These binding sites are typically placed  
184 upstream of a minimal promoter<sup>6,59</sup>. We refer to the whole promoter, introduced in ref.<sup>57</sup> as *LIP* (“light-  
185 inducible promoter”). Unlike PhyB, El222 incorporates flavin-mononucleotide as chromophore, which is  
186 naturally occurring in budding yeast. A recent version of *LIP* has been built using the *GAL1* promoter  
187 with the Gal4 activator binding sites deleted<sup>29</sup> instead of the minimal promoter, which we refer to as *GLIP*  
188 (“GAL1pr-based light-inducible promoter”).

## 189 Construction of the *promoter-yEVENUS-PEST* library

190 In order to characterize the inducible systems in a systematic and comprehensive manner, we constructed  
191 a library of promoters driving the expression of yEVENUS<sup>60</sup>, a bright and fast-folding<sup>30</sup> yellow fluorescent  
192 protein optimized for expression in budding yeast. For a fast-reacting transcriptional reporter (Fig. 2 A),  
193 we fused the fluorescent protein to a constitutive degron (PEST) from the *CLN2* gene, which leads to fast  
194 degradation of the protein.<sup>61</sup> The *yEVENUS-PEST* construct has been extensively used in the past, including  
195 as a transcriptional reporter in budding yeast.<sup>43,62</sup> In the library, we included *GAL1pr*, *GALL*, *MET3pr*,  
196 *CUP1pr*, *PHO5pr*, the synthetic *tetOpr*/Tet-On, and Z<sub>3</sub>EV systems, and the optogenetic systems PhyB-  
197 PIF3 and El222 controlling two different promoters, *LIP* and *GLIP*. In addition, we created a new El222  
198 mutant, strongLOV controlling *LIP*, which is introduced in greater detail below.

199 Several factors such as the genomic integration site<sup>63,64</sup>, the sequence between the promoter and  
200 the gene used for cloning<sup>65</sup>, and the terminator sequence<sup>66</sup> are thought to potentially influence expression  
201 in budding yeast. In addition, genetic constructs can in principle be integrated in different copy numbers  
202 in the genome, resulting in different levels of expression and noise (Supplementary Fig. 1).<sup>67,68</sup> To allow  
203 direct comparisons between the inducible systems, we built the *promoter-yEVENUS-PEST* circuits using  
204 the same plasmid backbone sequence and the same cloning strategy and we integrated them as single  
205 copies in the same locus (*URA3*) in the genome (Methods).

206 To prevent transcriptional read-through, some researchers have placed a terminator upstream of  
207 the genetic circuit of interest.<sup>1,69-71</sup> It has been suggested that in yeast, terminators themselves can function  
208 as promoters due to the presence of a hexamer motif which resembles the *TATA* box sequence, required  
209 for transcriptional initiation.<sup>72</sup> However, the effect of an upstream terminator on gene expression has not  
210 been determined. To test whether an upstream terminator modulates the activity of the downstream  
211 expression cassette, we also tested the doxycycline-inducible promoter (*tetOpr*) with the *ADHI*  
212 terminator placed upstream of the promoter, which we refer to as *t-tetOpr*.

## 213 Measurement process

214 We measured the induction dynamics by tracking single cells using time-lapse microscopy. Cells were  
215 grown in non-inducing medium overnight (>12 h), diluted to remain in log phase. Then, the *promoter-*  
216 *yEVENUS-PEST* circuit was induced for 3.5 hrs, then shut off, and monitored for another 3 hrs. The period  
217 of induction corresponded to roughly 2.5 budding yeast cell cycles in glucose medium, a sufficiently long  
218 time for many applications. A summary of the inducing and non-inducing/repressing conditions is given  
219 in Table 1. Detailed descriptions of the conditions are given in Supplementary Note 1. For tuning the  
220 induction level of the blue light-inducible systems, it was convenient to use the diasopic LED source.

221

| Transcriptional system                                            | Inducing condition                    | Non-inducing or repressing condition |
|-------------------------------------------------------------------|---------------------------------------|--------------------------------------|
| <i>GAL1pr</i> , <i>GALL</i>                                       | Galactose                             | Raffinose, Glucose                   |
| <i>MET3pr</i>                                                     | Absence of methionine                 | Methionine                           |
| <i>CUP1pr</i>                                                     | Cu <sup>2+</sup> ions                 | Absence of Cu <sup>2+</sup>          |
| <i>PHO5pr</i>                                                     | Absence of inorganic phosphate        | Inorganic phosphate                  |
| <i>tetOpr</i> , <i>t-tetOpr</i>                                   | Doxycycline                           | Absence of doxycycline               |
| Z <sub>3</sub> EV                                                 | Estradiol                             | Absence of estradiol                 |
| E1222- <i>LIP</i> , strongLOV- <i>LIP</i> ,<br>E1222- <i>GLIP</i> | Blue light                            | Absence of blue light                |
| PhyB-PIF3                                                         | Red light ( $\approx$ 650 nm) and PCB | Far-red light ( $\approx$ 750 nm)    |

222 Table 1. Inducing and non-inducing/repressing conditions used for controlling the activity of inducible systems.

223 To quantify the inducible systems' characteristics, intuitive and transferable units are needed.  
 224 Given that *GAL1pr* is plausibly the most widely used inducible system in yeast, the strongest one among  
 225 the ones tested by us, and has been adapted for other model systems such as *Drosophila sp.*<sup>73</sup> and  
 226 mammalian cell lines<sup>74</sup>, we introduce a unit for promoter activity which we denote maxGAL1. The value  
 227 of 1 maxGAL1 corresponds to the stationary level of expression from a single *GAL1* promoter (Fig. 5 D).  
 228 Introducing a unit allows easy comparison of promoter strengths from different sources assuming that the  
 229 promoter construction is standardized within each set of experiments and that one includes *GAL1pr* as a  
 230 reference. For example, the activity of frequently used constitutive promoters can be expressed in terms  
 231 of maxGAL1, with *PGK1pr* and *TEF1pr* in glucose having  $\approx$ 0.40 maxGAL1 and *TDH3pr*  $\approx$ 0.70 maxGAL1  
 232 transcriptional activity<sup>75</sup>.

### 233 Single-cell time courses

234 The strength of the systems varied more than 50-fold, from  $\approx$ 0.02 maxGAL1 for *GALL* to  $\approx$ 1 maxGAL1 for  
 235 *GAL1pr* (Fig. 2). (The standard deviation (SD) reflecting noise is discussed in Section 'Noise'. The data is  
 236 replotted with the standard error of the mean (SEM) in Supplementary Fig. 2 showing that the underlying  
 237 cell numbers sufficed for determining the mean.) Interestingly, several systems showed complex dynamics  
 238 upon induction. *MET3pr* and *GALL* exhibited a decline in activity for  $t > 1.5$  h. The initially weak  
 239 activation of *PHO5pr* was followed by substantially stronger induction starting at around  $t = 2$  h. In  
 240 addition, *CUP1pr* and *GALL* showed strong temporal fluctuations (single-cell trajectories in Fig. 2 L, N).  
 241 The *tetO* promoters showed a substantial delay in shut-off compared to other systems. We found that a  
 242 terminator placed upstream of the *tetO* expression cassette did not have a substantial effect on the  
 243 expression dynamics. Given that the expression pattern of *tetOpr* was hardly distinguishable from the one  
 244 of *t-tetOpr*, we focused on characterizing *tetOpr* only in the subsequent analyses. The red-light inducible  
 245 optogenetic system showed high stochasticity, with only 25% of cells being substantially activated by the  
 246 red-light pulse ( $t = 3.5$  h). The comparison between the Gal4-based transcriptional PhyB-PIF3 system and  
 247 the PhyB-PIF3 system used for subcellular localization suggests that the high stochasticity comes from the  
 248 DNA binding functionality (Supplementary Fig. 3). Expression of *yEVenus* in cells with the Z<sub>3</sub>EV system  
 249 stayed high even 3 hrs after estradiol was depleted from the medium. We wondered whether this sustained  
 250 activity could be due to the hormone sticking to the surfaces of our microfluidic chips, continuously  
 251 activating the system. To test this, we monitored the transcriptional activity after a thorough washout in  
 252 liquid culture. The results showed that the system needs several hours to begin to turn off (Supplementary  
 253 Fig. 4) independently of any potential adhesion of estradiol to the microfluidic chamber walls.

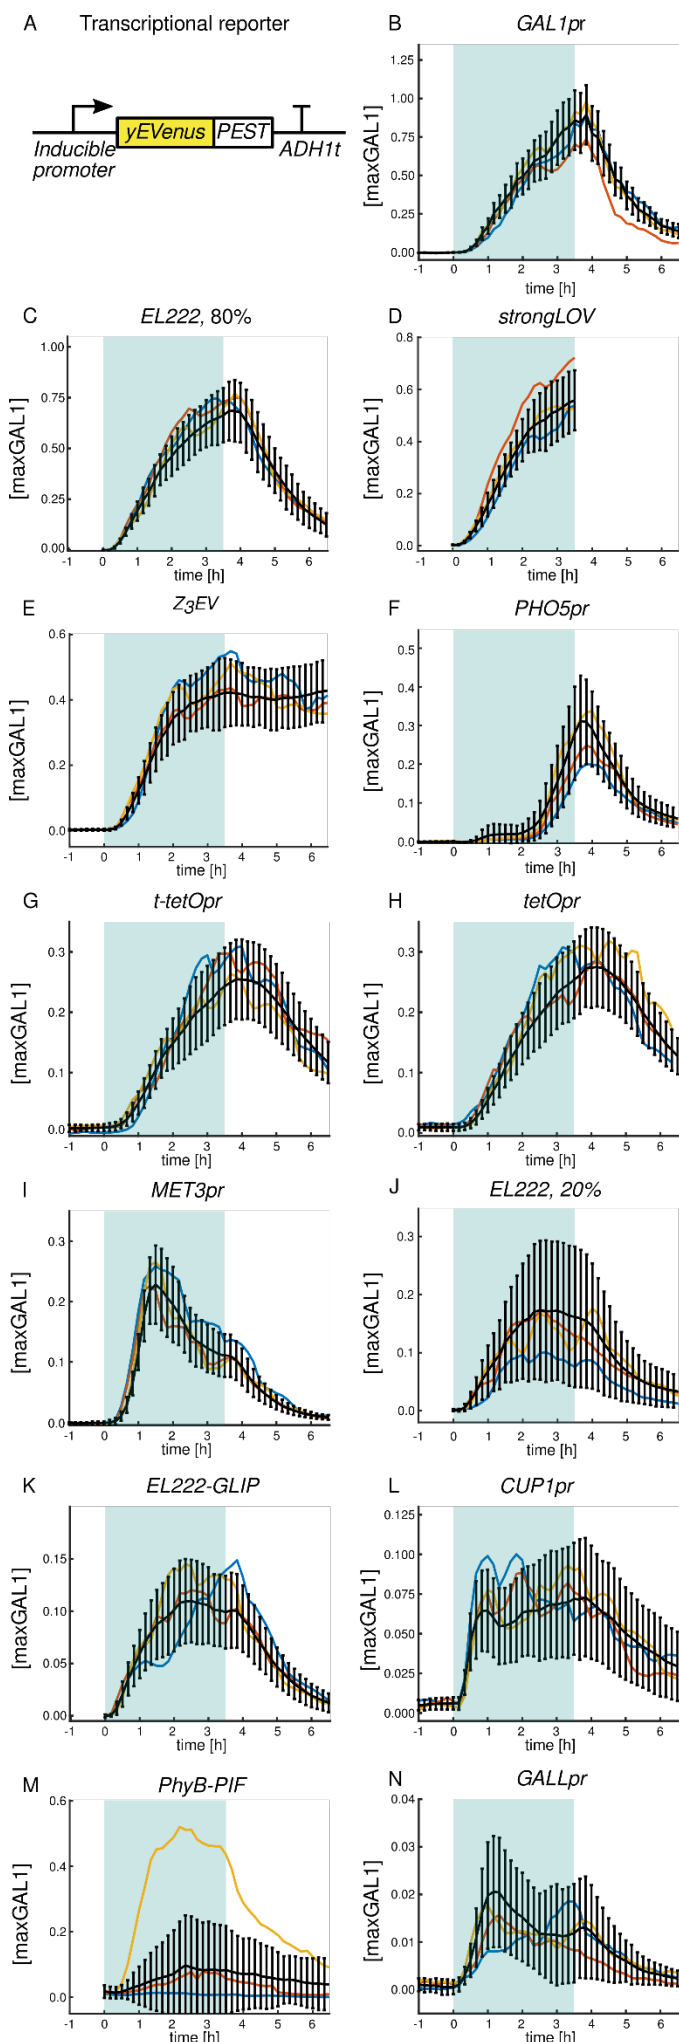

**Figure 2.** On and off dynamics of inducible systems. **A:** The reporter for transcriptional activity consists of an inducible promoter and the fast-folding yellow fluorescent protein *yEVENUS* gene fused to a constitutive degron (*PEST*) and the *ADH1* terminator. **B-N:** Time courses of activation and deactivation for different inducible systems sorted in descending order by peak average strength. Induction starts at  $t = 0$  h and finishes at  $t = 3.5$  h. The blue background represents the induction period. Expression is quantified in maxGAL1 units, where 1 maxGAL1 corresponds to steady-state expression of *GAL1pr*. Black lines show the average of the mean cellular expression and standard deviation. Colored lines show different representative single-cell time courses. For the light-inducible systems, fluorescence was not measured prior to induction in order to avoid possible activation by the light source used for fluorescent protein excitation. *EL222* refers to the WT-*EL222* transcription factor inducing *LIP* under 20% or 80% light intensity, as indicated. *strongLOV* refers to the Glu84Asp *EL222* mutant introduced in this article inducing *LIP* under 20% light. *GLIP* is induced by *EL222* under 80% light. Due to the high sensitivity of *strongLOV* to the excitation light used for the fluorescence measurements, quantification of the off dynamics by microscopy was not possible with our system; turn-off experiments were thus done with samples taken from liquid culture (Fig. 13). Numbers of analyzed cells for each plot are given in Supplementary Table 14.



254 Intriguingly, *MET3pr* showed an overshoot and partial adaptation after induction. To investigate  
255 the mechanism for this, we changed the site of integration of the construct, which had no apparent  
256 influence on *MET3pr* expression dynamics (Fig. 3 A). To test whether the partial adaptation could be  
257 attributed to upregulation of methionine biosynthesis upon removal of methionine from the medium, we  
258 deleted the *MET17* gene (also known as *MET15*, *MET25*), which is responsible for most of the synthesis  
259 of homocysteine, the precursor of methionine.<sup>76,77</sup> Inducing the single-copy *MET3pr-yEVENUS-PEST*  
260 construct in the *met17Δ* background generated a stronger response to methionine depletion and without  
261 the distinctive overshoot (Fig. 3 B). Since methionine depletion in *met17Δ* cells causes growth defects that  
262 might kick in during the 3.5 hrs of the *MET3pr* induction, we tested whether the lack of overshoot in the  
263 *met17Δ* mutant can be simply explained by a lower protein dilution rate. To exclude the effect of cell  
264 growth, we compared the *total* yEVENUS levels accumulated during the 3.5 hrs. Even after accounting for  
265 the differences in growth, the final level of yEVENUS was higher in the *met17Δ* than in the WT background  
266 (Fig. 3 C), suggesting that feedback from methionine biosynthesis contributes to the partial adaptation of  
267 *MET3pr* activity.

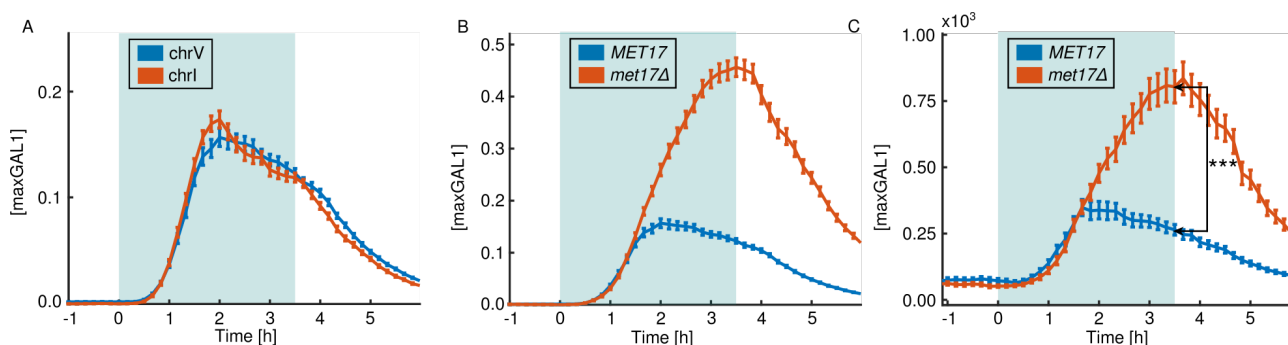

268 Figure 3. Feedback-mediated cellular production of methionine contributes to an overshoot and decline of *MET3pr*  
269 activity. A: Changing the integration site does not alleviate the overshoot as the amplitude and timing remain  
270 unaffected. Induction of two constructs is shown, one integrated at the *URA3* locus on chromosome V and one  
271 integrated on chromosome I between the *SSA1* and *EFB1* open reading frames. B: Induction of the *MET3pr-*  
272 *yEVENUS-PEST* construct in the *met17Δ* background and wild type. C: Total levels of yEVENUS fluorescence per cell  
273 (instead of the average fluorescence as in panels A and B) suggest that dilution of the fluorescent protein due to  
274 growth does not explain the observed differences in *MET3pr* activity.  $p = 3.7e-11$ , one-tailed t-test. A, B, C: The blue  
275 background represents the induction period, i.e., lack of methionine. Bars around the points show the standard error  
276 of the mean (SEM). Numbers of analyzed cells are given in Supplementary Table 15.

278 The *PHO5* promoter presented another intriguing time course. The observed two-step induction  
279 pattern could be due to phosphate depletion beginning to block growth at about 2-2.5 hrs after induction,  
280 thus, preventing dilution of yEVENUS. The activation pattern could also be due to fluctuations in cytosolic  
281 phosphate levels during induction; for example, phosphate released from the vacuole could be depleted at  
282 2-2.5 hrs. We decided to test whether a growth block makes the fluorescence from the *PHO5pr-yEVENUS-*  
283 *PEST* reporter, averaged over the cell area, appear to shoot up. Thus, we analyzed the growth rate of cells  
284 during the last hour of induction. Cells showed a healthy growth rate comparable to cells grown in  
285 synthetic complete media (Fig. 7). Thus, changes in growth rate are not responsible for the second jump  
286 in *PHO5pr* activity. On the other hand, the reported timing of polyphosphate exhaustion from the  
287 vacuole<sup>52</sup> matched the time of the second jump in *PHO5pr* activity. Thus, internal phosphate stores are  
288 more likely to be responsible for the two-step transcriptional *PHO5pr* activation pattern than effects on  
289 growth and dilution.

## 290 Mathematical model of inducible transcriptional system dynamics

291 We wished to distill the time courses for each inducible system (Fig. 2 B-N) into intuitive parameters.  
292 Quantitative descriptions could not simply be extracted from the time courses ‘by eye’. This is because the  
293 time courses did not, for example, consist of piece-wise linear functions, which allow one to read off  
294 parameters directly. Instead, the time courses were smooth (see Fig. 4 A for a magnified plot of the initial  
295 rise of the fluorescence). There are two well-known reasons for this smoothing, the maturation and the  
296 degradation-and-dilution times of the destabilized fluorescent protein reporter, with previously reported  
297 timescales of  $\approx 20$  min and  $\approx 40$  min, respectively<sup>43</sup>. A sudden increase in fluorescent protein expression  
298 manifests as a smooth increase with these two timescales determining how fast the fluorescence follows  
299 the underlying transcriptional dynamics. Thus, to extract parameters from the time courses, a  
300 mathematical model needed to be fit.

301 A minimal model would have parameters with obvious meanings and would prevent overfitting.  
302 To identify the minimal model complexity that was needed, we analyzed the initial rise in fluorescence  
303 (Fig. 4). This part of the time course fit a quadratic function well (slope of 1.85, 99% confidence interval:  
304 1.67-2.03, on a log-log scale for the time points from  $t = 20$  min to  $t = 70$  min). Thus, a second order  
305 differential equation, in which the activation of the promoter is a step function (Fig. 5 A), was called for.  
306 Such a model has been used previously<sup>29,32,43,67</sup>. The first equation in this model describes the expression  
307 dynamics of the unfolded fluorescent protein. The maturation of the fluorescent protein, a slow step  
308 during gene expression, is modeled by the second equation. Both steps are affected by protein degradation-  
309 and-dilution equally. In the model, the basal (non-induced) expression is controlled by  $b$ . Promoter  
310 activity upon inducer addition is determined by an initial lag  $t_{-on}$  between the start of the induction signal  
311 and the start of gene expression. The initial slope of the unfolded protein rise is denoted by  $i$ . The time  
312 between the inducer removal and the start of decline in promoter activity is characterized by the lag  $t_{-off}$ .  
313 The rate of the fluorescence decay after promoter turn-off is characterized by degradation-and-  
314 dilution rate  $d$ .

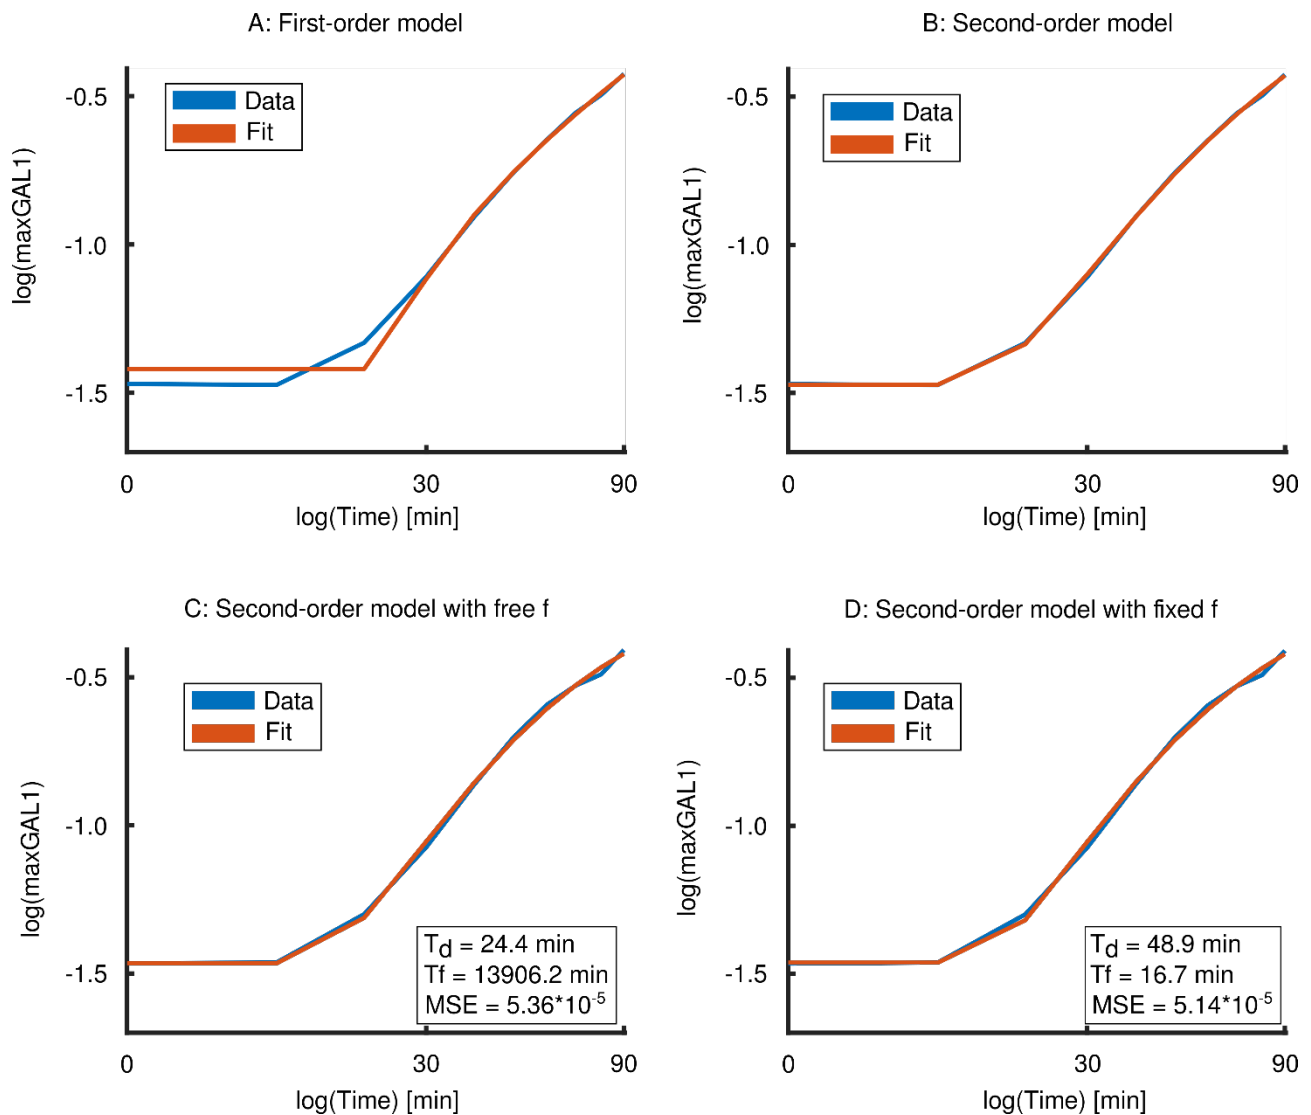

315

316 Figure 4. A second-order differential equation fits the time courses well. A: A first-order differential equation model  
 317 (red) does not fit the time course of El222-driven *LIP-yEVENUS-PEST* expression with 80% light induction (blue)  
 318 well. B: The expression dynamics is fit well by a second-order differential equation model. C, D: However, the  
 319 second-order differential equation model is not constrained sufficiently since the data can be fit well using very  
 320 different parameters for  $d$  and  $f$ . To avoid this, we will fix the maturation rate  $f$  in the second-order model by  
 321 measuring it in an independent experiment (see Supplementary Note 2). Fits are shown for single-cell data expression  
 322 of *LIP-yEVENUS-PEST*. MSE: mean squared error of the fit.  $T_d$  and  $T_f$  are  $\ln(2)/d$ , and  $\ln(2)/f$ , respectively.

323 Approximating the initial rise of fluorescence using a simpler, first-order model yielded poor fits  
 324 (Fig. 4 A). Therefore, using simple methods such as thresholding also fails to extract parameters accurately.  
 325 On the other hand, increasing the order of the model requires more parameters to be extracted from the  
 326 data. Already with the second-order model, we observed that the data does not constrain the parameters  
 327 enough since, for example, very different kinetics of promoter activation  $f$  and  $d$  fit the data equally well  
 328 (Fig. 4 C and D). To prevent this, we had to measure the yEVENUS maturation rate in our experiments  
 329 directly and used this value as a fixed parameter  $f$  when fitting the model to the data (see Supplementary  
 330 Note 2). Thus, with the model we chose, all remaining unknown parameters ( $b$ ,  $i$ ,  $d$  and the time delays)  
 331 could be uniquely identified based on the fluorescent protein level measurements only (see Methods  
 332 section for mode details). No parameter could be removed without the fit clearly becoming worse, and  
 333 adding more parameters led to poorly constrained parameters and overfitting. Extending the model to  
 334 characterize the gene expression process in greater detail would be possible by using more experimentally

335 measured parameters<sup>18,29</sup> but was not necessary nor desirable for the purpose of extracting intuitive  
336 quantitative characteristics and benchmarking.

337 Note that *GALL*, *MET3pr*, *CUP1pr*, and *PHO5pr* show more complicated time courses. To be able  
338 to compare the different systems using quantitative parameters nevertheless, we used the model only for  
339 the rise (from -50 min to 50 min for extracting *b*, *i* and *t-on*) and the fall (from 210 min to 270 min for *t-*  
340 *off* and 270 min to 390 min for *d*) of the time courses (see Methods sections for more details on fitting  
341 procedure). While interesting and potentially important for certain applications, the rest of the dynamics  
342 is not comparable between all of the different inducible systems. Thus, we only distill the dynamics around  
343 the on and off switches into coarse-grained parameters.

344

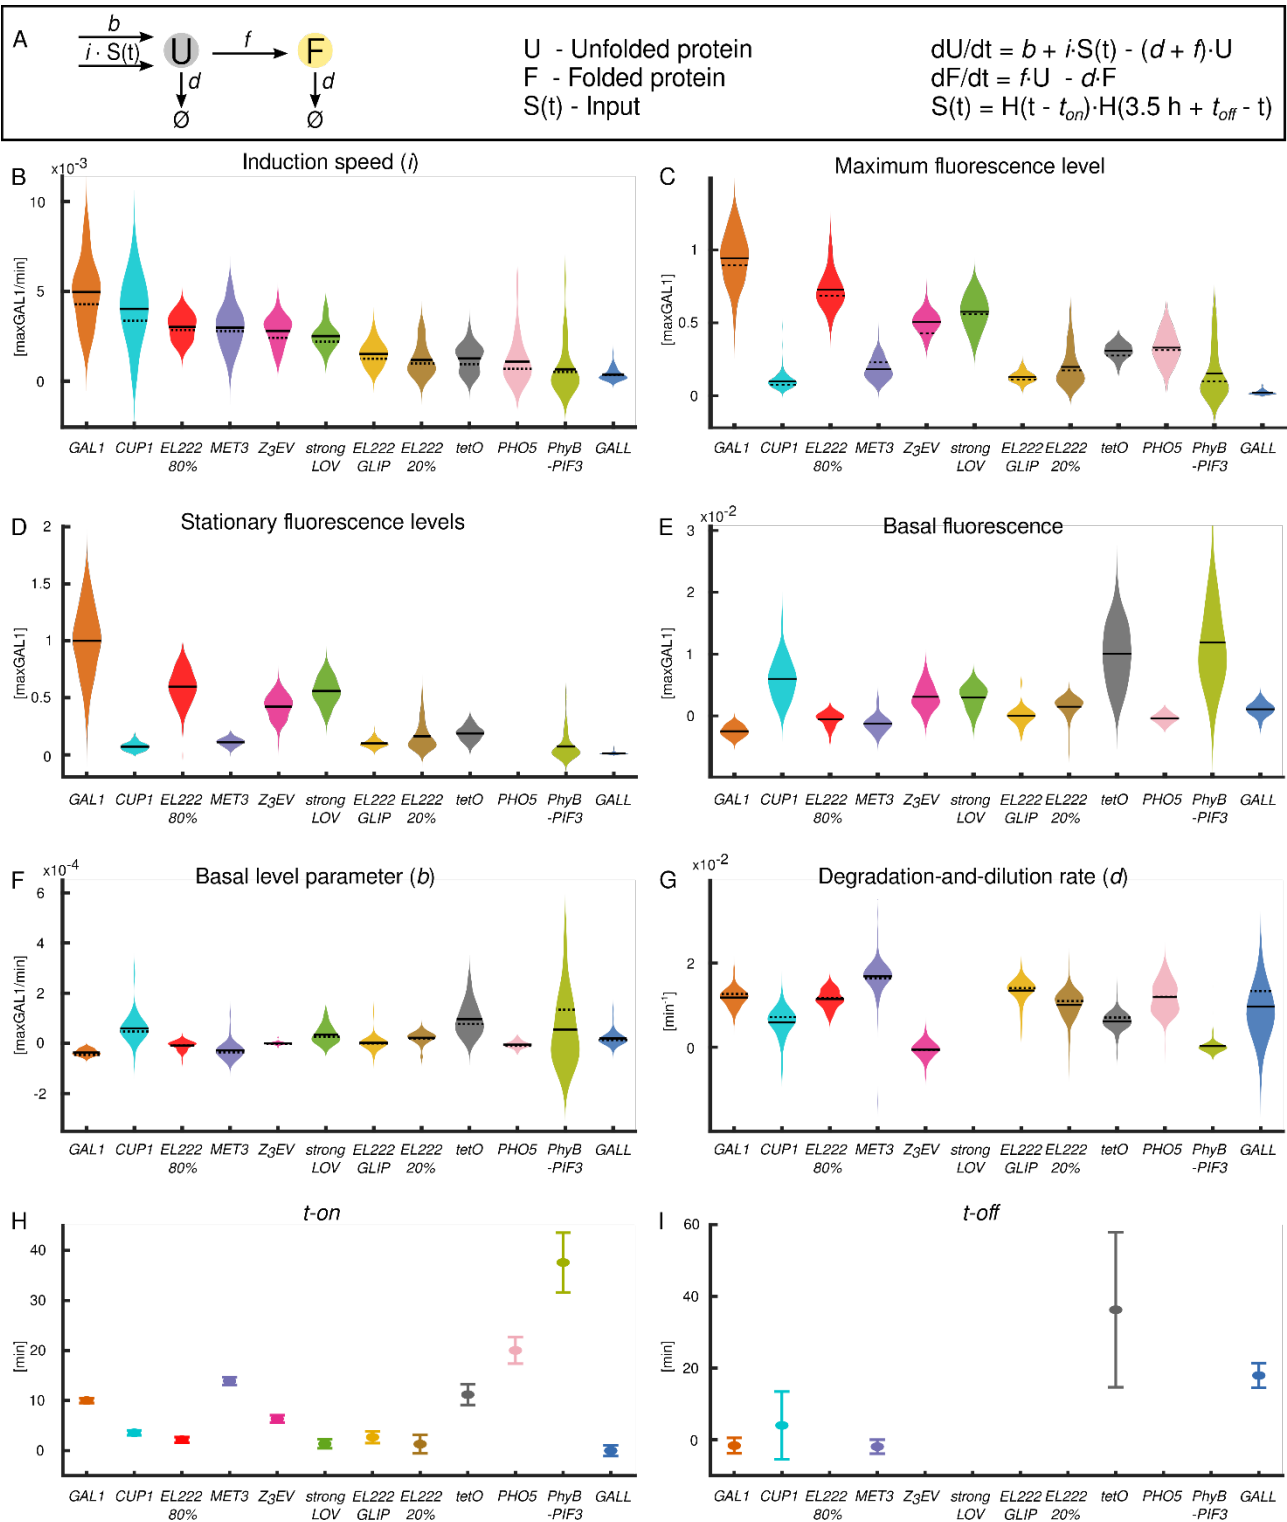

345

346 Figure 5. Single-cell-level characteristics of the inducible transcriptional systems. Violin plots show distributions of  
 347 parameters estimated by fitting fluorescence levels from single cells. Black solid lines show the mean of the  
 348 distribution. Black dashed lines in panels B-G represent the extracted parameters after averaging over all cells first.  
 349 *EL222 20%*, *EL222 80%*, *strongLOV*, and *GLIP* are defined in the caption of Fig. 2. A: Model of gene expression used  
 350 to extract the quantitative parameters describing the inducible systems.  $H(t)$  is the Heaviside step function, 0 for  $t <$   
 351 0 and 1 for  $t \geq 0$ . B: Speed of induction  $i$ . C: Maximum fluorescence levels. D: Steady-state level of induction was  
 352 defined for *CUP1pr*, *MET3pr*, *Z3EV*, *EL222* with 20% induction light, *GLIP*, *PhyB-PIF3*, *strongLOV* and *GALL* as  
 353 the level of induction at  $t = 3.5$  h. For *GAL1pr*, *EL222* with 80% induction light, and *tetOpr*, we defined the steady-  
 354 state levels after overnight ( $>16$  h) induction since these systems did not reach steady-state levels during the first 3.5  
 355 hours of induction. The steady-state level of *PHO5pr* is not shown given that the prolonged lack of inorganic

356 phosphate causes cell-cycle arrest. E: Basal fluorescence levels. F: Basal activity parameter  $b$ . G: Degradation-and-  
357 dilution rate  $d$ . Degradation-and-dilution rate not shown for strongLOV-*LIP* because it could not be measured by  
358 fluorescence microscopy and was determined by sampling cells from liquid culture (Fig. 13 B). H: Time delay upon  
359 activation  $t_{on}$ . I: Time delay upon deactivation  $t_{off}$ . H, I: To estimate the time delay upon deactivation reliably, we  
360 fitted the model only to the average expression values, not single-cell data. Standard errors of the mean shown in  
361 panels H and I were estimated by bootstrapping single-cell expression values and fitting 100 averaged time courses  
362 to the model. H, I: For all systems except the light-inducible ones, we removed the time it takes the medium to reach  
363 the microfluidics chamber (160 s) from the estimated  $t_{on}$  and  $t_{off}$  values. For light-inducible systems and *PHO5pr*,  
364  $t_{off}$  could not be determined precisely (see main text). “pr” in the promoter names was omitted for brevity. For  
365 determining the PhyB-PIF3 leakiness and parameter  $b$ , we noticed that a few cells ( $n = 3$ ) out of 33 showed  
366 substantially higher values than the rest of the population. Since this causes an increase of the bandwidth for the  
367 violin plot and prevents clear visualization of the other systems’ leakiness, we excluded these cells from the main  
368 figure but provide the panels E and F without the removal of the cells in Supplementary Fig. 6. The p-values for  
369 differences between different systems are shown in Supplementary Tables 3-10. Numbers of analyzed cells are given  
370 in Supplementary Table 14.

### 371 Inference of intuitive parameters

372 By fitting the model in Fig. 5 A to the observed fluorescence values (Methods), we extracted the values  
373 for the initial speed ( $i$ ), basal activity ( $b$ ), degradation rate ( $d$ ), and lag upon activation and deactivation ( $t_{on}$   
374 and  $t_{off}$ , respectively). In cases where the systems did not reach their maximal activity during the 3.5  
375 h induction period, we measured the steady-state expression levels after an overnight growth in inducing  
376 media with dilutions to keep cells in log phase throughout. Single-cells fits are shown in Supplementary  
377 Fig. 7.

#### 378 - Initial speed ( $i$ )

379 The initial speed  $i$  spanned a 10-fold range, with *GAL1pr* being the fastest and *GALL* the slowest system  
380 (Fig. 5 B).

381 The initial slopes of induction were as follows:

382 *GAL1pr* > *CUP1pr* > El222-*LIP*, 80% > *MET3pr* > Z<sub>3</sub>EV > strongLOV > El222-*GLIP* > El222-*LIP*, 20% >  
383 *tetOpr* > *PHO5pr* > PhyB-PIF3 > *GALL*

#### 384 - Maximum level and steady-state ‘on’ levels

385 It is interesting that the maximum induction levels (Fig. 5 C) did not necessarily reflect the initial speed  
386 of the induction. Because some inducible transcriptional systems showed transient dynamics, e.g., an  
387 overshoot, which was not followed by a long-term, steady-state behavior of the system, we also measured  
388 the steady-state induction levels (Fig. 5 D). For systems that reach a stationary expression level during the  
389 3.5 h long induction experiment (Fig. 2), the steady-state level was defined as the level at the last timepoint  
390 of induction (Fig. 5 D). Given that *GAL1pr*, *LIP*, and *tetOpr* did not reach steady-state levels during the  
391 3.5 h induction period, we measured the expression levels for these systems after an overnight (> 16 h  
392 long) induction (Fig. 5 D) during which the cultures were diluted to keep them in log phase. *PHO5pr* did  
393 not reach a steady-state level after 3.5 h but given that the prolonged absence of inorganic phosphate  
394 causes cell cycle arrest<sup>78</sup>, we did not perform an overnight induction for this system. Hence, steady-state  
395 levels and  $t_{off}$  for *PHO5pr* are not shown.

396 Steady-state induction levels were as follows:

397 *GAL1pr* > El222-*LIP*, 80% > strongLOV > Z<sub>3</sub>EV > El222-*LIP*, 20% > *tetOpr* > *MET3pr* > El222-*GLIP* >  
398 PhyB-PIF3 > *CUP1pr* > *GALL*

399 - Basal activity (*b*) / leakiness

400 With three exceptions, the *promoter-yEVENUS-PEST* reporters showed no activity in the off state, that is,  
401 no leakiness at the level of sensitivity of fluorescence microscopy (Fig. 5 E). Only the *CUP1pr*, *tetOpr*, and  
402 the PhyB-PIF3 system showed considerable levels of expression (approx. 1% maxGAL1) in the absence of  
403 the inducing signal. Therefore, we boosted the sensitivity of our system by removing the *PEST* sequence,  
404 the results of which are presented in the Section 'Leakiness' (Fig. 6). Note that in Fig. 5 E, negative values  
405 arise in part because auto-fluorescence can vary across a population and is systematically lower in raffinose  
406 versus glucose media.

407 - Degradation-and-dilution rate rate (*d*)

408 The rate *d* includes two components: active degradation of the reporter protein which is destabilized by  
409 the PEST degron and degradation through dilution due to cellular growth, which is non-negligible in fast-  
410 growing cells such as budding yeast. Interestingly, we measured large differences in degradation-and-  
411 dilution rates for the different systems. We hypothesized that this is due to differences in growth rates  
412 under different inducing conditions (see Section 'Effect of induction conditions on cellular growth', Fig.  
413 7, 8 for more details). Indeed, for most of the inducible systems, the overall degradation-and-dilution rate  
414 changed linearly as a function of the growth rate with slope equal to one. *GALL* showed substantial  
415 variations in degradation-and-dilution rates due to the large temporal fluctuations during the induction  
416 period introducing large variability in the estimated parameters (single-cell trajectories of cells shown in  
417 Fig. 2). For the four inducible systems Z<sub>3</sub>EV, PhyB-PIF3, *CUP1pr*, and *tetOpr*, the very small degradation-  
418 and-dilution rates could not be explained by slow growth alone since they fell far from the linear  
419 regression line, indicating particularly slow turn-off of these systems after the induction signal was turned  
420 off. (We discussed the slow turn-off for Z<sub>3</sub>EV above.)

421 - Lag times (*t-on*, *t-off*)

422 The lag times turned out to be particularly sensitive to temporal fluctuations in the single-cell time  
423 courses. Therefore, we extracted the delay upon activation (*t-on*) and upon deactivation (*t-off*) of the  
424 inducible systems after averaging the time courses over the population, resulting in smoother time courses  
425 (Fig. 2). To estimate *t-off* precisely for the systems that did not reach steady-state levels during the 3.5 h  
426 induction period (*GAL1pr*, *tetOpr*), we performed an experiment in which we switched off the system  
427 after an overnight induction, keeping cells in log phase throughout. *In vitro* measurements of *t-off* for  
428 the El222 protein have shown that this parameter is on the order of 1 min.<sup>79</sup> Because this quantity has  
429 already been measured accurately and because the fluorescence measurements themselves induced *LIP*  
430 and *GLIP*, we do not report *t-off* for these two systems. In contrast, we could measure *t-on* accurately for  
431 *LIP* and *GLIP* by just not taking any images before induction.

432 Time delays upon activation and deactivation of the constructs (Fig. 5 H and I) are summarized below:

433 *t-on*: *GALL* < El222-*LIP*, 20% < strongLOV < El222-*LIP*, 80% < El222-*GLIP* < *CUP1pr* < Z<sub>3</sub>EV < *tetOpr* <  
434 *GAL1pr* < *MET3pr* < *PHO5pr* < PhyB-PIF3

435 *t-off*: *MET3pr* < *GAL1pr* < *CUP1pr* < *GALL* < *tetOpr*

436 **Leakiness**

437 For many applications, e.g., expression of toxic genes, the basal activity of the inducible systems is critical  
 438 and needs to be known. Yet, it has not been measured systematically or quantitatively. To determine  
 439 leakiness rigorously, we boosted the reporter levels by removing the *PEST* sequence, and measured  
 440 activities in non-inducing conditions. While the degron was important for quantifying the expression  
 441 dynamics, it was not needed to measure leakiness, which is a steady-state property. Crucially, since the  
 442 strains only had one copy of the *promoter-yEVENUS* constructs, we were able to measure the minimal,  
 443 fundamental leakiness of each system. For the synthetic inducible systems, the transcription factor levels  
 444 allow further tuning of the strength and leakiness of the systems; however, our measurements showed  
 445 stark differences between the different systems, making this an inauspicious avenue for substantially  
 446 changing the ranking of the different systems with respect to this characteristic.

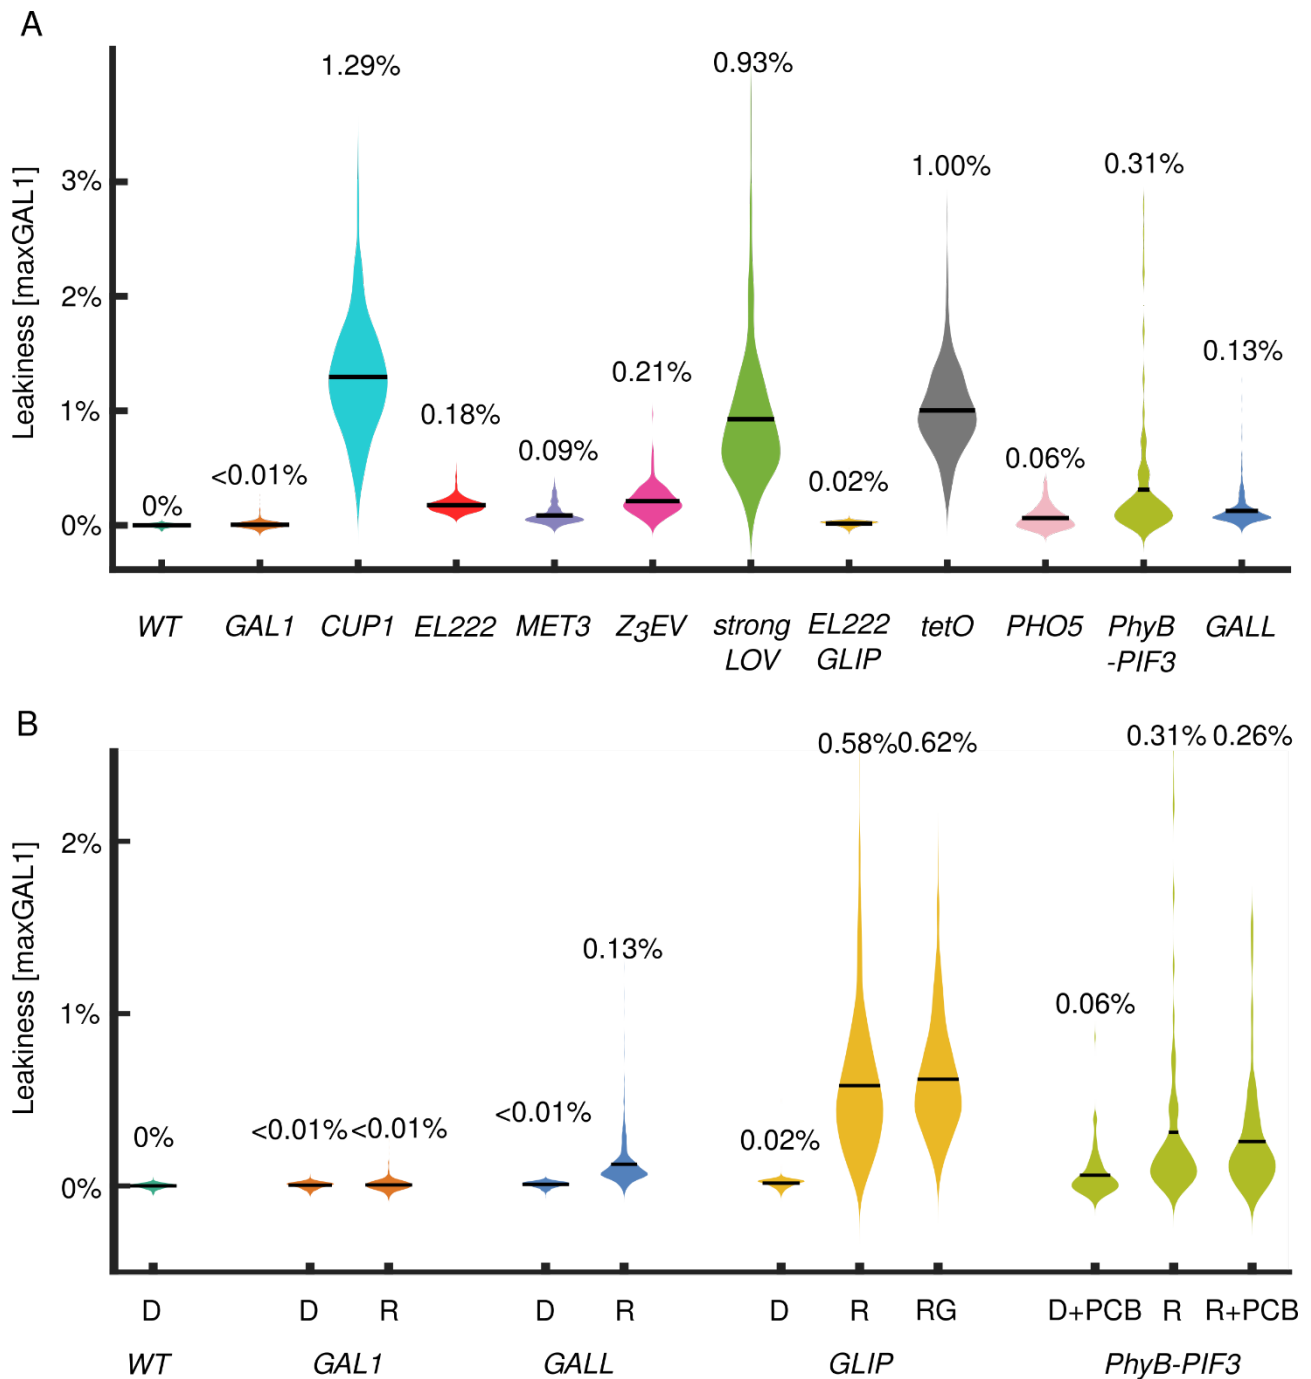

447

448



449 Figure 6. Minimal leakiness measurements using *promoter-yEVENUS* reporters (without the PEST degnon). A:  
450 Removal of the *PEST* sequence from the transcriptional reporters uncovers the leakiness of each system. *GALL*,  
451 *GAL1pr*, and PhyB-PIF3 leakiness was measured in raffinose. *EL222* refers to leakiness of the *El222-LIP* system.  
452 *strongLOV* refers to the leakiness of *strongLOV-LIP*. B: Basal activities of *GAL1pr*, *GALL*, *GLIP*, and PhyB-PIF3  
453 depend on the carbon source, D - glucose, R - raffinose, G - galactose. A, B: “pr” in the promoter names was omitted  
454 for brevity. The measurements were calibrated with respect to the previous figures (where the PEST degnon was  
455 present) using the leakiness of *tetOpr*. Thus, all expression levels are comparable across different figures and are  
456 always normalized to peak *GAL1pr* expression levels, i.e., shown in maxGAL1 units. Average values for each  
457 measurement are shown above the corresponding violin plots. p-values for statistical significance of differences are  
458 given in Supplementary Tables 11-12. Numbers of analyzed cells are given in Supplementary Table 16.

459 In glucose, all systems except *GAL1pr*, *GALL*, and *GLIP*, showed leakiness greater than 0.05%  
460 maxGAL1 (Fig. 6 A). As expected from the previous measurements with the PEST degnon (Fig. 5 E), the  
461 *tetOpr*, *CUP1pr*, *strongLOV* driving *LIP*, and PhyB-PIF3 systems showed the highest levels of leakiness.

462 The tight nature of the *GAL1* and *GAL1*-based promoters might come from a glucose-repression  
463 system that is independent of the Gal4/Gal80 activator/repressor system<sup>80</sup> and is mediated by the Mig1  
464 repressor. To investigate this, we measured the basal activity of *GAL1pr*, *GALL*, and *GLIP* in media with  
465 different sugars (Fig. 6 B). *GAL1* showed no detectable leakiness in glucose or raffinose, in which the Gal4  
466 activator is repressed by Gal80<sup>81</sup>. However, *GALL* showed detectable basal expression in raffinose. For  
467 complete repression of *GAL* genes by Gal80, two adjacent Gal4-binding sites are needed as in *GAL1pr*.<sup>82</sup>  
468 In contrast, *GALL* contains only one of the two sites from *GAL1pr*, which may explain its increased level  
469 of basal activity in raffinose compared to glucose (for visual representation see Supplementary Fig. 7 B).  
470 Similarly, *GLIP* showed significantly higher basal levels of expression in raffinose and galactose, compared  
471 to glucose. Given that *GLIP* inherited the Mig1 binding sites from *GAL1*, this difference is presumably  
472 due to basal activity of the El222 transcription factor that becomes detectable once the inhibition by the  
473 glucose-repression system is alleviated (Supplementary Fig. 7 C). However, although the endogenous  
474 *GAL80* repression machinery was present, the Gal4-based PhyB-PIF3 system caused substantial leakiness  
475 of *GAL1pr* in raffinose (Fig. 6 B), presumably because the split Gal4 protein in this system is no longer  
476 sufficiently repressed by Gal80<sup>81</sup>.

477 The doxycycline-inducible system, used widely in many different organisms, showed remarkably  
478 high levels of basal expression ( $\approx 1\%$  maxGAL1), comparable to the induced state of *GALL*. To address the  
479 leakiness problem, mutant doxycycline-responsible transcription factors were developed in ref. <sup>83</sup>. Testing  
480 the tightest of those systems, the rtTA system, we observed under a variety of doxycycline concentrations  
481 and induction times that the induction was highly unreliable and generated substantial cell-to-cell  
482 variability (Supplementary Figure 9). Thus, the leakiness of the *tetOpr* system remains an important  
483 concern for applications.

484 The basal activities of the systems shown in Fig. 6 A are summarized below:

485 *CUP1pr* > *strongLOV* > *tetOpr* > PhyB-PIF3 > Z<sub>3</sub>EV > *El222-LIP* > *GALL* > *MET3pr* > *PHO5pr* > *El222-*  
486 *GLIP* > *GAL1pr*

#### 487 **Effect of induction conditions on cellular growth**

488 Expression systems may interfere with growth due to less favorable nutrient conditions needed for  
489 induction, toxicity of the inducers, or metabolic burden<sup>18</sup>. To benchmark the systems with respect to cell  
490 growth, we measured the doubling times of the areas of the cell colonies during the last hour of induction  
491 (2.5 h < t < 3.5 h) (Fig. 7).

492

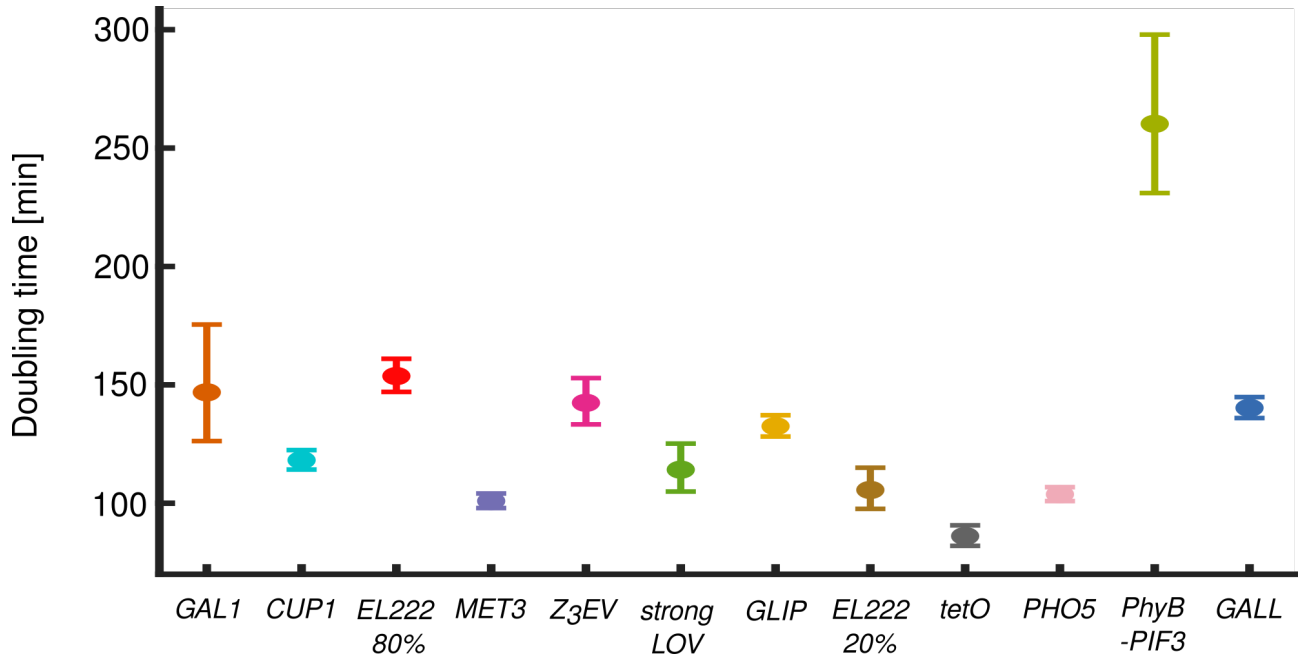

493

494 Figure 7. Area doubling time of cells harboring different inducible constructs in the induced state. Error bars  
 495 represent 90% confidence intervals. *EL222 20%*, *EL222 80%*, *strongLOV*, and *GLIP* are defined in the caption of Fig.  
 496 2. “pr” in the promoter names was omitted for brevity. p-values for the differences between the pairs of parameters  
 497 are supplied in Supplementary Table 13. Numbers of analyzed cells are given in Supplementary Table 14. For  
 498 *GAL1pr*, the colony that was not fully present in the field of view and which would bias the estimation of the growth  
 499 rate, was excluded, reducing the number of analyzed cells shown in Supplementary Table 14 to 79 ( $t = 3.5$  h).

500 The diascopic light used to induce the expression of LIP had an effect on growth when applied at  
 501 80% of the maximal strength (Fig. 7 *EL222 80%* and *GLIP*). Cells exposed to light at 20% of maximal  
 502 strength had a more healthy area doubling time of around 100 min (Fig. 7 *EL222 20%* and *strongLOV*).

503 Cell size doubling times during the last hour of induction are summarized below:

504  $tetOpr < MET3pr < PHO5pr < EL222-LIP, 20\% < strongLOV < CUP1pr < EL222-GLIP < GALL < Z3EV <$   
 505  $GAL1pr < EL222-LIP, 80\% < PhyB-PIF3$

506 Since growth dilutes cellular contents, we wished to analyze how active degradation due to the  
 507 PEST degenon and dilution due to cell growth contribute to the overall degradation-and-dilution rate  $d$   
 508 from the model. By plotting  $d$  versus the growth rate, we found that the relationship was explained well  
 509 by a line with slope 1 with a few prominent exceptions (Fig. 8). This indicates that the differences in  
 510 degradation-and-dilution rates are mostly due to differences in the growth rates. The intercept of the  
 511 optimal fit is  $0.0072 \text{ min}^{-1}$ , from which the half-life of yEVENUS-PEST can be calculated:  $\ln(2)/0.0072 \text{ min}$   
 512  $= 96.3 \text{ min}$ . This agrees with the yEVENUS-PEST degradation half-life which we also measured directly by  
 513 blocking protein translation with cycloheximide (Supplementary Note 3).

514 Furthermore, *Z3EV*, *PhyB-PIF3*, *CUP1pr*, and *tetOpr* fell far below the linear regression line (Fig.  
 515 8), indicating that the slow degradation-and-dilution rates cannot be explained by slower growth. Instead,  
 516 these systems are turning off slowly.

517

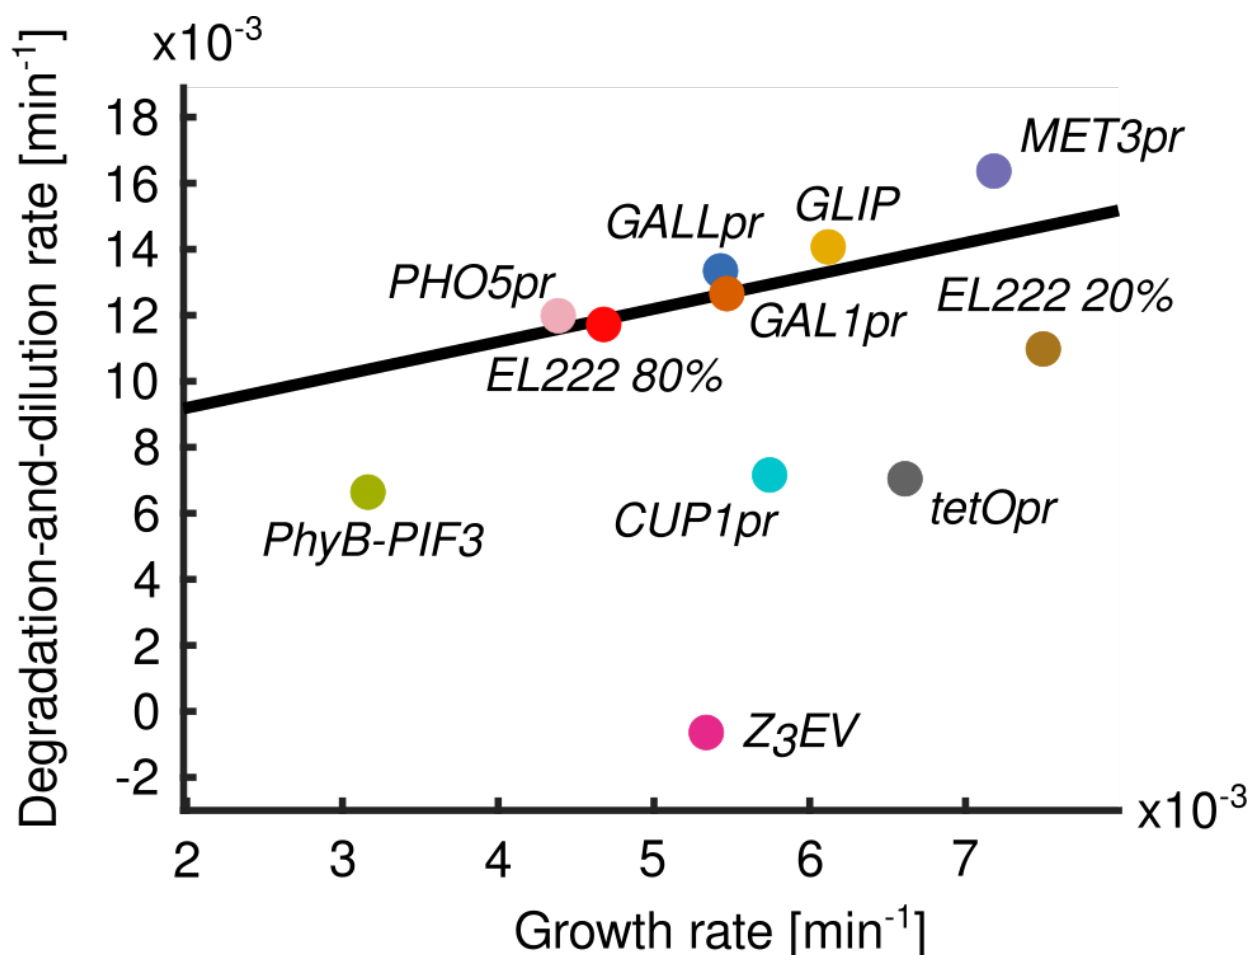

518

519 Figure 8. The differences in fitted degradation-and-dilution rates  $d$  in the different systems can be largely explained  
520 by differences in growth rates. Since the overall degradation-and-dilution rate  $d$  is the sum of the rate of dilution  
521 due to growth and the rate of degradation by the protein degradation machinery, we performed a linear fit with  
522 slope fixed to one. The fit shown in black is obtained by excluding *CUP1pr*, *tetOpr*, *PhyB-PIF3*, and *Z3EV*, which  
523 deviate from the general trend. The most prominent outlier is *Z3EV*. Cells with the *Z3EV* system continue to grow  
524 but do not turn the construct off, resulting in a degradation-and-dilution rate close to zero. Similarly, for *PhyB-PIF3*,  
525 *CUP1pr*, and *tetOpr*, the overall degradation-and-dilution rate  $d$  is smaller than expected given the growth rate. This  
526 can be due to residual transcription in the absence of the inducer. Incidentally, among the inducible systems in the  
527 plot, these are also the systems for which the fundamental leakiness was the highest. *EL222 20%*, *EL222 80%*,  
528 *strongLOV*, and *GLIP* are defined in the caption of Fig. 2. Degradation-and-dilution rates shown here are extracted  
529 from averaged fluorescence values, and are the same as the ones shown in Figure 5. Growth rates shown in the plot  
530 are calculated using the same timepoints as for the degradation-and-dilution rate (for exact values see Materials and  
531 methods section). Note that these growth rates can be different from the ones measured during the last hour of the  
532 induction period, which are shown in Fig. 7. The only exception from this is *PHO5pr*, for which we neglected the  
533 timepoints after which cells abruptly stopped growing presumably due to a lack of inorganic phosphate in the  
534 induction medium.

### 535 Noise

536 Within a population of genetically identical cells, the responsiveness of a genetic circuit can vary. The  
537 relationship between mean and standard deviation can be complex.<sup>84,85</sup> To investigate this for inducible  
538 transcriptional systems, we calculated the coefficient of variation for the last timepoint ( $t = 3.5$  hrs) of  
539 induction in the time course experiments (Fig. 9).

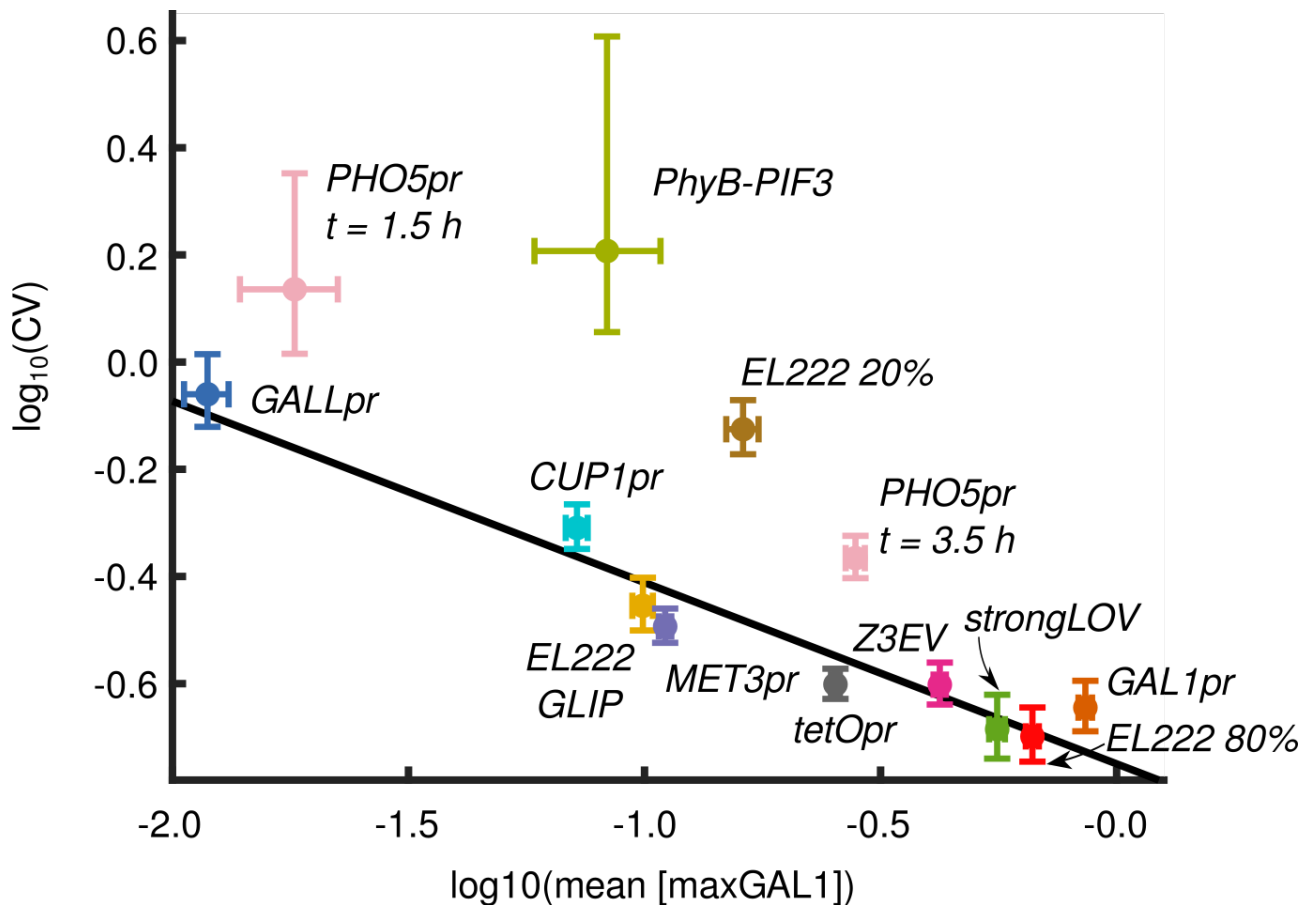

540

541 Figure 9. Log of noise (CV) versus mean expression levels are inversely correlated. Noise is calculated as the  
542 coefficient of variation for the population of cells at the last timepoint of induction,  $t = 3.5$  h, unless stated otherwise.  
543 Fluorescence values are in maxGAL1 units. Vertical and horizontal bars around the values show 90% confidence  
544 intervals. *EL222 20%*, *EL222 80%*, *strongLOV*, and *GLIP* are defined in the caption of Fig. 2. The least squares  
545 regression was computed after excluding *PhyB-PIF3*, *EL222* induced with 20% light intensity, and *PHO5pr*, slope =  
546  $-0.34$ ,  $R^2 = 0.93$ , 95% confidence interval:  $[-0.42, -0.26]$ . Numbers of analyzed cells are given in the Supplementary  
547 Table 14.

548 As expected<sup>86,87</sup>, noise levels decreased with the increase in the mean expression level, meaning  
549 that the strongest inducible systems were also the least noisy ones. The coefficient of variation scaled  
550 linearly with the mean level of expression on a log-log scale (Fig. 9). *PhyB-PIF3* showed a high level of  
551 noise for its mean expression level compared to other systems. To test whether this observation can be  
552 associated with noise in the PCB internalization by cells, we constructed a plot similar to Fig. 9 but under  
553 non-induced conditions and in the absence of the PEST degron (Supplementary Figure 8). We observed a  
554 similar level of leakiness noise in the *PhyB-PIF3* system with and without PCB, indicating that high noise  
555 in this system is not due to PCB internalization. Interestingly, the *EL222-LIP* system induced under low  
556 light conditions (20% of maximal intensity) showed a comparatively high level of noise. *PHO5pr* was also  
557 noisy relative to its mean compared to other systems (Fig. 9). We wondered whether the additional slow  
558 step, in which the internal storage of inorganic phosphate has to be used up before *PHO5pr* is fully  
559 activated<sup>52</sup>, introduces additional noise. However, the level of noise for the *PHO5* promoter at  $t = 1.5$  h  
560 after induction, before the second activation of *PHO5*, was also substantially higher than expected from  
561 the linear regression line (Fig. 9). Given the relatively low noise of the non-induced *PHO5* promoter  
562 (Supplementary Fig. 8), these results point to other mechanisms that might be contributing to the  
563 particular pattern of *PHO5pr* noise such as chromatin remodeling.<sup>88,89</sup>

## 564 Characterization of the arginine-responsive promoter *ARG3pr*

565 We decided to expand our analysis by an additional promoter, *ARG3pr*, which is part of the arginine-  
566 synthesis pathway in budding yeast and has not previously been characterized for use as an inducible  
567 system. *ARG3* is essential for arginine biosynthesis, coding for ornithine carbamoyltransferase, which  
568 converts ornithine to citrulline, a precursor of arginine<sup>90</sup>. At the transcriptional level, *ARG3* is controlled  
569 by arginine availability through transcription factors Arg80, Arg81, and Arg82, which form the repressive  
570 ArgR complex<sup>91</sup> as well as by general amino acid control mechanisms through the Gcn4 activator<sup>92</sup>.

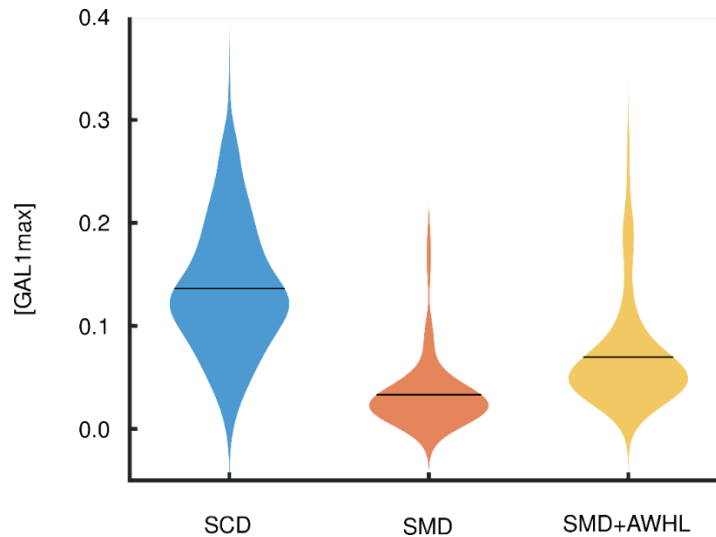

571

572 Figure 10. *ARG3* promoter is induced less in synthetic minimal medium than synthetic complete medium. SCM -  
573 Synthetic complete medium. SMM – Synthetic minimal medium. SMM+AWHL – Synthetic minimal medium with  
574 adenine, tryptophan, histidine, and leucine, for which our strain was auxotrophic. Horizontal bars denote the mean  
575 of the population. For details about media composition, see Supplementary Note 1. Numbers of analyzed cells are  
576 given in Supplementary Table 17.

577 We chose to characterize *ARG3pr* since the transcriptomic analysis of Gasch et al.<sup>93</sup> showed that  
578 *ARG3* is the 7<sup>th</sup> most upregulated transcript upon amino-acid starvation longer than 30 min. For  
579 comparison, *MET3* is the 8<sup>th</sup> most upregulated gene under the same conditions. The motivation to pursue  
580 *ARG3pr* came from our observation that many of the synthetic systems we benchmarked have important  
581 shortcomings and endogenous inducible systems such as *GAL1pr* and *MET3pr* are some of the overall best  
582 inducible promoters at least with respect to strength, speed, and reversibility. Furthermore, no additional  
583 transcription factors have to be introduced for endogenous systems, making them convenient in various  
584 situations where more cell or molecular biology work would be needed to introduce the synthetic  
585 transcription factor. For many applications, finding a third, good inducible transcriptional system in  
586 addition to the *GAL* promoters and *MET3pr* would be very useful.

587 As a first test, we transferred cells containing a single copy of an *ARG3pr-yEVENUS-PEST* construct  
588 from synthetic complete medium to medium lacking all amino acids and measured the expression level of  
589 the reporter after 1.5 h (Fig. 10). Unexpectedly, *ARG3pr* activity decreased in response to amino acid  
590 depletion; supplying only the essential nutrients did not change this result (Fig. 10). Since *ARG3* is known  
591 to be also post-transcriptionally regulated<sup>94</sup>, we hypothesized that in synthetic minimal medium, the  
592 overall transcript levels might still increase if degradation of *ARG3* mRNA decreased. To test this, we  
593 measured fluorescence levels in a strain with an *ARG3pr-ARG3-mNeonGreen* gene fusion<sup>95</sup>. Under the  
594 same starvation conditions, we observed an Arg3-mNeonGreen protein trend similar to *ARG3pr-*  
595 *yEVENUS-PEST* (Supplementary Fig. 10). Thus, neither transcription from *ARG3pr* nor Arg3 protein levels

596 reflect the strong upregulation of ARG3 mRNA reported by Gasch et al.<sup>93</sup>. The following results indicate  
597 that this could be due to minor but difficult-to-replicate or -control differences in media.

598         Since using media without amino acids has the drawback that it slows down growth and blocks  
599 growth completely when cells are auxotrophic for the amino acids not present in the medium, we moved  
600 on to characterize *ARG3pr* when only certain amino acids were removed. Cells grown in synthetic  
601 complete medium did not show a substantial difference in *ARG3pr* induction in response to arginine  
602 removal (Fig. 11, the two violin plots on the right). We assumed that this behavior could be explained by  
603 the combinatorial regulation of *ARG3pr* with other nutrients present in synthetic complete medium  
604 which mask arginine regulation<sup>96</sup>. Thus, we analyzed the effect of arginine in combination with  
605 methionine, one of the nutrients that strongly upregulates *ARG3*<sup>97</sup> and that would be used in combination  
606 with the *MET3pr* system. We found that methionine indeed activates *ARG3pr*. Interestingly, *ARG3pr* is  
607 turned on to a similar extent by either the absence of arginine, the presence of methionine, or both,  
608 resembling an OR logic function (-A OR +M) (Fig. 11 A). However, the basal level of activity in the  
609 presence of arginine and absence of methionine was relatively high, favoring the use of *ARG3pr* as a sensor  
610 in bulk culture.

611         Negative auto-regulation such as the repression of *ARG3* transcription by arginine is present in  
612 many other anabolic processes. Examples include the control of *LEU2*<sup>98</sup>, *URA3*<sup>99</sup>, *LYS20*<sup>100</sup>, and *MET3*<sup>42</sup>.  
613 On the other hand, the induction of *ARG3pr* by methionine was more puzzling since the biosynthesis of  
614 methionine and arginine are not obviously linked. We speculate that this is due to methionine serving as  
615 a global anabolic activation signal<sup>101,102</sup>. Gcn4, one of the *ARG3pr* regulators<sup>92</sup>, is essential for arginine  
616 biosynthesis and is induced in the presence of methionine<sup>102</sup>. It is unclear, however, what the functional  
617 role of the global regulation of metabolism by methionine is.

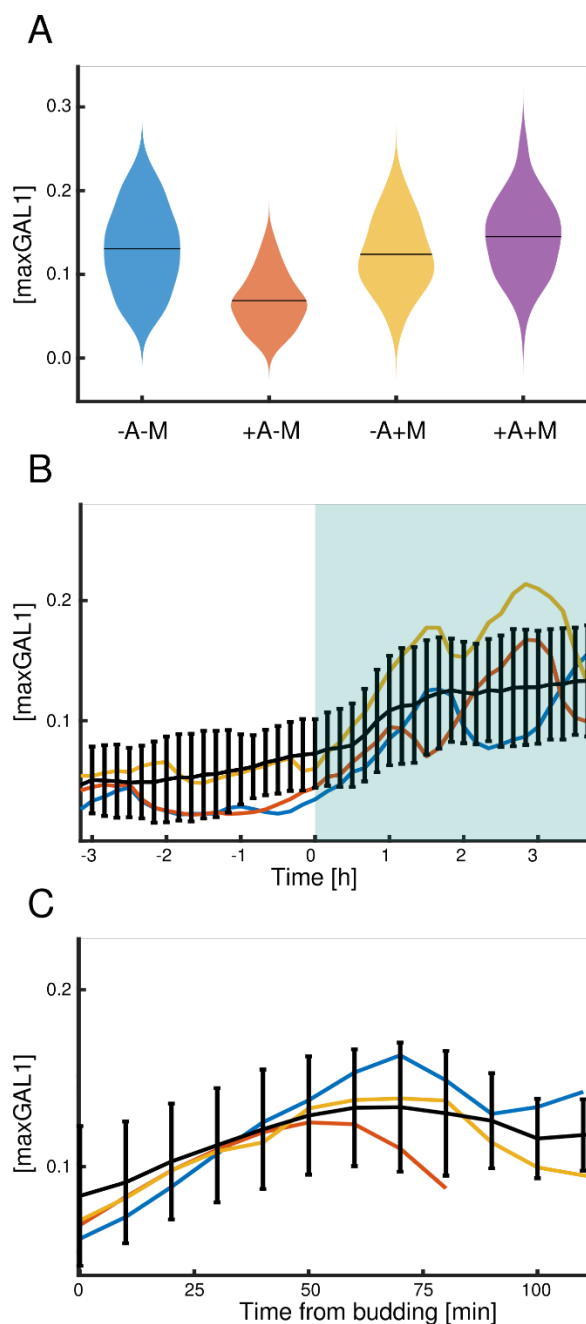

Figure 11. Dynamic properties of the *ARG3* promoter. A: Mean activity of *ARG3pr* in different media. +A or +M denote 10x concentrations of arginine or methionine, respectively, and -A and -M denote the lack of arginine or methionine in the medium. Numbers of analyzed cells are  $n = 131$  (-A-M),  $n = 79$  (+A-M),  $n = 83$  (-A+M),  $n = 110$  (+A+M). B: Time courses of ARG3-yEVENUS-PEST activity in medium lacking methionine. The switch from +A to -A occurred at 0 h. Black line represents the average of the cells' fluorescence levels and colored lines represent examples of single-cell fluorescence time courses. Number of cells present at  $t = 0$  h is  $n = 51$ . C: Alignment of the single-cell trajectories ( $n = 17$ ) using the time of budding shows that *ARG3pr* is likely cell-cycle regulated. In all panels, fluorescence is normalized with respect to steady-state levels of *GAL1pr* induction. Error bars indicate the standard deviation (SD).

618

619 To characterize the dynamics of arginine-controlled switching between the off state (in -M+A  
 620 medium) to the on state (in -M-A medium), we analyzed the *ARG3pr-yEVENUS-PEST* expression time  
 621 courses. *ARG3pr* responds quickly to the removal of arginine in medium lacking methionine (Fig. 11 B).  
 622 Although at the population level, the *ARG3* promoter showed stable changes in activity in the presence  
 623 of inducing medium, single-cell trajectories showed strong oscillations with a period close to the cell-cycle  
 624 period, which was not detected previously<sup>103</sup>. The transcriptional regulation of *ARG3* involves the  
 625 transcription factor Mcm1,<sup>104</sup> which controls the expression of several cell-cycle periodic genes.<sup>105,106</sup>  
 626 When analyzing the cell-cycle-dependent trajectories of *ARG3pr* expression (Fig. 11 C), we observed that  
 627 its expression peaked roughly after the middle of the cell cycle, potentially coinciding with peaks in other  
 628 Mcm1-regulated genes such as *CLB2*.

629 Given that *ARG3pr* is activated by methionine, while *MET3pr* suppressed, they can be used jointly  
 630 when inverted control of two circuits by a single input is needed.

## 631 strongLOV: a more light-sensitive El222 mutant

632 We sought to broaden the repertoire of optogenetics systems used for control of cellular processes by  
633 creating and characterizing a variant of the El222-*LIP* transcription-factor-promoter system that is more  
634 sensitive to light.

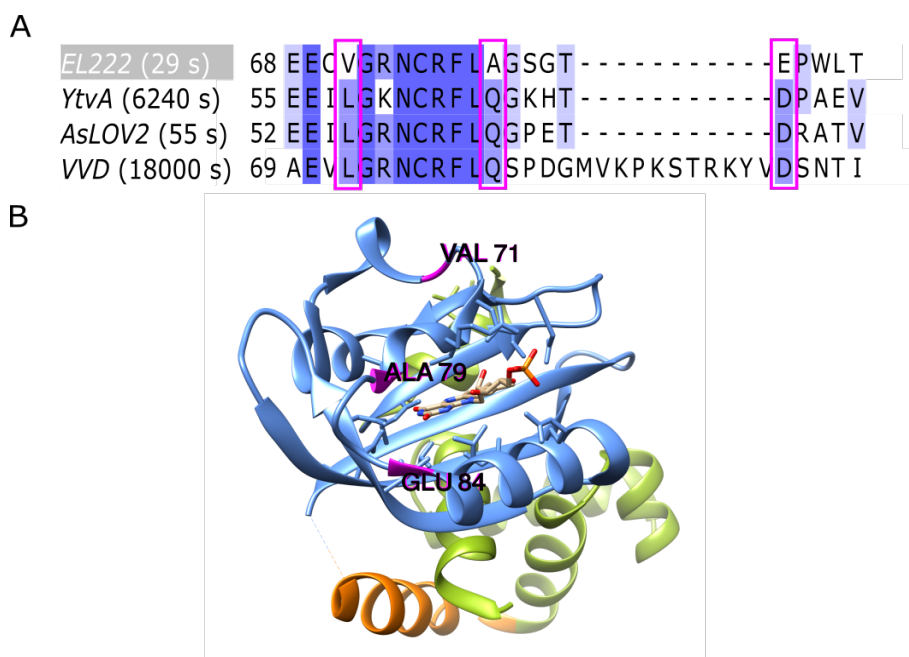

635

636 Figure 12. A comparison of LOV-domain sequences suggests candidates for mutations that stabilize the active state  
637 of El222. A: Multiple-sequence alignment of LOV-domain proteins with characterized dark-reversion kinetics.  
638 Amino acids are colored based on their similarity to the consensus sequence. The numbers next to the protein names  
639 indicate the half-life of the active state<sup>107</sup>. The residues that are conserved between YtvA, AsLOV2, and VVD but  
640 not present in El222 are marked by the pink boxes. (There are no more such residues outside of the subsequence of  
641 El222 shown.) B: The position of the identified residues (pink) in the El222 structure. The LOV domain is shown in  
642 blue, while the J $\alpha$  helix and the HTH domain are shown in orange and green, respectively. The light-absorption  
643 center, flavin-mononucleotide chromophore, is shown in the middle of the structure.

644 We focused on identifying mutations that increase the light sensitivity of El222. The output of  
645 El222 is thought to depend on the time the protein spends in the active state, bound to the promoter.<sup>57</sup> By  
646 comparing the dark-reversion kinetics and the amino acid sequences of El222 and other LOV-based  
647 photoswitches, we found several residues that are not present in El222 but are shared among other proteins  
648 with slower turn-off kinetics: Val71Leu, Ala79Gln, and Glu84Asp (amino acid identities given with  
649 respect to El222) (Fig. 12 A)<sup>107</sup>. Our hypothesis was that introducing a residue from the slow-cycling  
650 proteins (YtvA, AsLOV2 and VVD) into El222 would stabilize the light-activated state. A similar approach  
651 has been used to develop the AQTrip El222 mutant<sup>59</sup>, which incorporates the Ala79Gln<sup>108,109</sup> mutation,  
652 among others. However, this mutant has an active state with an *in vitro* half-life of around 30 min, which  
653 may impede its applications in experiments where faster off switching is needed. Thus, we considered the  
654 other two candidates for mutations (Val71Leu and Glu84Asp). Given the proximity of Glu84Asp to the  
655 chromophore in the tertiary structure of the protein (Fig. 12 B) and the milder nature of the residue  
656 exchange (aspartic for glutamic acid), we decided to characterize the Glu84Asp mutant, which we named  
657 strongLOV.

658 To compare the *in vivo* performance of strongLOV to wild-type El222, we introduced both  
659 transcription factors in single copies into the yeast genome harboring a single copy of *LIP-yEVENUS-PEST*



660 as a transcriptional reporter. We first measured the induction of both strains under low light conditions  
661 (20% of maximal light intensity). *strongLOV* indeed responded more strongly to light activation, with an  
662 increased maximal intensity of around 5.5x (Fig. 13 A). When activated by high-intensity light (80% of  
663 maximal intensity), *strongLOV* showed induction levels comparable to wild-type *EL222* (Supplementary  
664 Fig. 11), suggesting saturation under strong light induction.

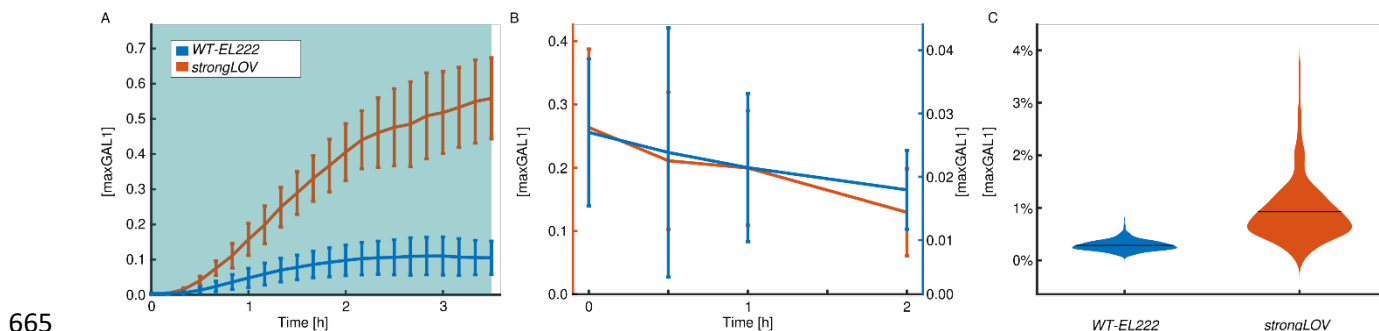

665  
666 Figure 13. The *strongLOV* variant responds more strongly compared to WT-*EL222* under low light conditions. A:  
667 Induction of wild-type and mutant *EL222* using light with 20% of maximal intensity (standard deviation shown  
668 around each timepoint). The blue background denotes the presence of continuous light. B: Turn-off dynamics  
669 obtained by sampling cells with *strongLOV* and *EL222* in bulk culture, which were previously pulsed with blue light  
670 for 1 min every 15 min, which is much weaker than 20% light induction in panel A. The light is turned off at  
671 timepoint 0, standard deviations around each timepoint shown. Note the different y-axes for *strongLOV* (orange,  
672 left) and WT-*EL222* (blue, right). C: Basal activity measured with the *LIP-yEVENUS* (no *PEST*) reporter strain.  
673 Horizontal bars denote mean values. Numbers of analyzed cells are given in Supplementary table 14.

674 To determine the turn-off dynamics of *strongLOV*, we could not use fluorescence microscopy,  
675 which continuously excited the system during measurements (Supplementary Fig. 11). We thus performed  
676 experiments in liquid culture where after long (> 12 h) log phase growth under low duty-cycle pulsing  
677 light (1 min of blue light every 15 min), we turned off the blue light source and monitored the dynamics  
678 of the fluorescent reporter by sampling the population of cells at different timepoints (Fig. 13 B). We  
679 observed a decline of the *strongLOV* activity with kinetics similar to WT-*EL222*.

680 To measure the leakiness of *strongLOV* we introduced it in a strain harboring the transcriptional  
681 reporter without the *PEST* sequence, as before. We observed a mean increase in the leakiness of the  
682 mutated protein of 3.2x compared to *EL222* (Fig. 13 C).

683 Taken together, these results show that the newly described Glu84Asp mutation effectively  
684 increases the sensitivity of *EL222* but also increases its leakiness.

## 685 **Multidimensional trade-offs**

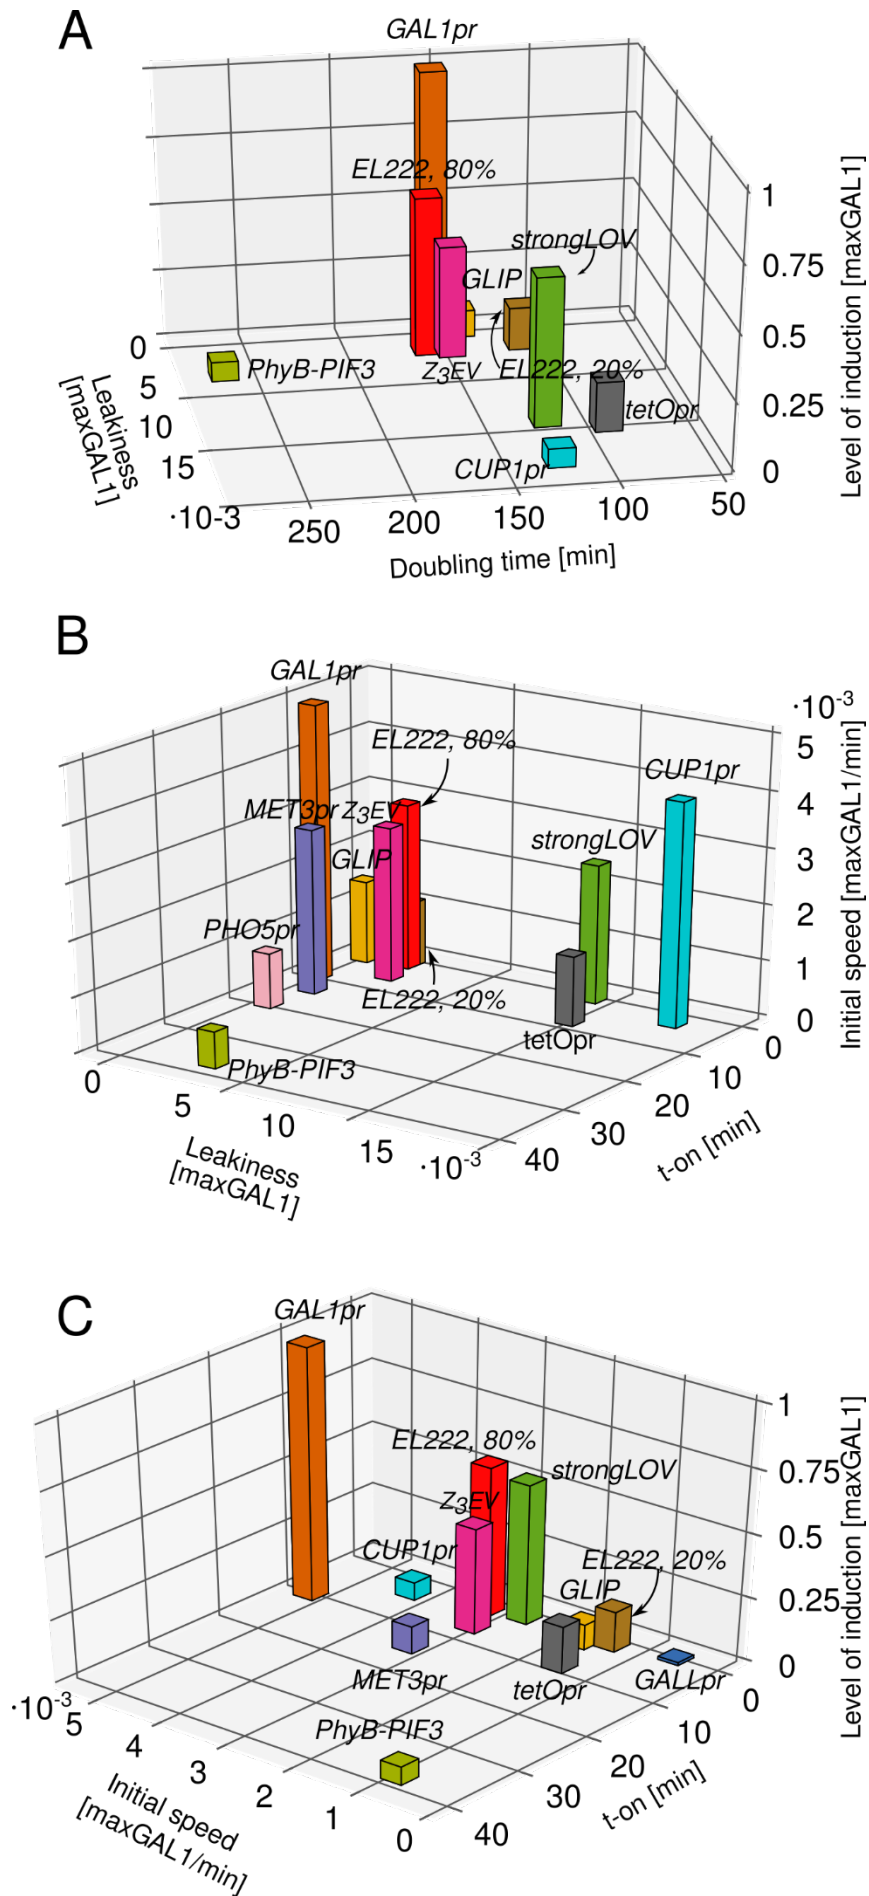

686  
687

688 Figure 14. Multidimensional benchmarking of inducible systems illustrates performance trade-offs. The underlying  
689 data is the same as in Figs. 5, 6 and 7. Levels of induction shown in panels A and C are the steady-state levels of  
690 induction, except for *PHO5pr*, for which we show the level of activation at  $t = 3.5$  h. *EL222* refers to the WT-*EL222*  
691 transcription factor induction of *LIP* under 20% or 80% light intensity, *strongLOV* refers to Glu84Asp *EL222*  
692 induction of *LIP* under 20% light, while *GLIP* is induced by *EL222* under 80% light. Numbers of analyzed cells are  
693 given in the Supplementary Table 14.

694 Different experiments might require systems with different maximal levels of induction, or may  
695 tolerate different levels of leakiness or growth burden. To show how the multidimensional  
696 characterization presented here highlights the drawbacks of the different inducible systems for budding  
697 yeast, we plotted the relationship between maximal levels of induction, leakiness, delay upon induction,  
698 and growth data (Fig. 14). Strong induction systems such as *EL222-LIP* induced at 80% of maximal light  
699 strength and *GALL1pr* are associated with slow cellular growth likely due to phototoxicity and a suboptimal  
700 carbon source, respectively. The weaker promoters *tetOpr*, *MET3pr*, *GALL*, and *CUP1pr*, either show  
701 substantial levels of leakiness (*tetOpr*) or show fluctuations (unstable expression) in time (*MET3pr*, *GALL*,  
702 and *CUP1pr*). The new strongLOV system is induced by less intense light; thus, it resolves the trade-off  
703 between phototoxicity and strength of induction – but has more leakiness in the dark.

#### 704 **Experimentally tuning the time between Start and mitosis**

705 One of the goals of synthetic biology is to engineer complex artificial cellular behaviors. This often requires  
706 multiple inducible systems to be controlled simultaneously with high temporal precision. A scenario  
707 where such precision is necessary is in controlling inherently dynamic systems such as the cell cycle. Here,  
708 we control the lag between cell cycle Start and mitosis by independently inducing the expression of Start  
709 and M-phase cyclins in succession.

710 Cyclins are regulatory proteins, which, together with the cyclin-dependent kinase Cdk1, control  
711 the processes required for cell cycle initiation, progression, and exit.<sup>110</sup> G1 cyclin (*CLN3*) and G1/S cyclins  
712 (*CLN1,2*) trigger entry into the cell cycle, while M phase cyclins (*CLB1*, *CLB2*) are needed for mitosis.<sup>110</sup>

713 In order to control entry into the cell cycle, we used a *MET3pr-CLN2* construct, which controls  
714 cell cycle Start in a strain in which all other Start cyclins have been deleted (*cln1-3Δ*).<sup>44</sup> To tune the  
715 expression of the major mitotic cyclin *CLB2*, whose rate of expression is known to be limiting for the  
716 speed of mitosis<sup>111,112</sup>, we put an undegradable version of this cyclin (*CLB2kd*)<sup>113</sup> under the control of  
717 *EL222-LIP*. We chose *EL222-LIP* among other tested systems because of its short response time (t-on),  
718 monotonicity, and relative strength. In addition, *EL222-LIP* induction can be modulated by varying the  
719 light intensity<sup>6,29</sup>. *LIP-CLB2kd* is solely responsible for mitotic entry in a strain in which both mitotic  
720 cyclins were deleted (*clb1,2Δ*). This strain is kept viable by a *GALL-CLB2* construct in galactose medium  
721 prior to the measurements.<sup>112</sup> Cells lacking all G1 and G1/S cyclins are arrested in G1 phase, while cells  
722 lacking *CLB1* and *CLB2* are arrested prior to M phase.

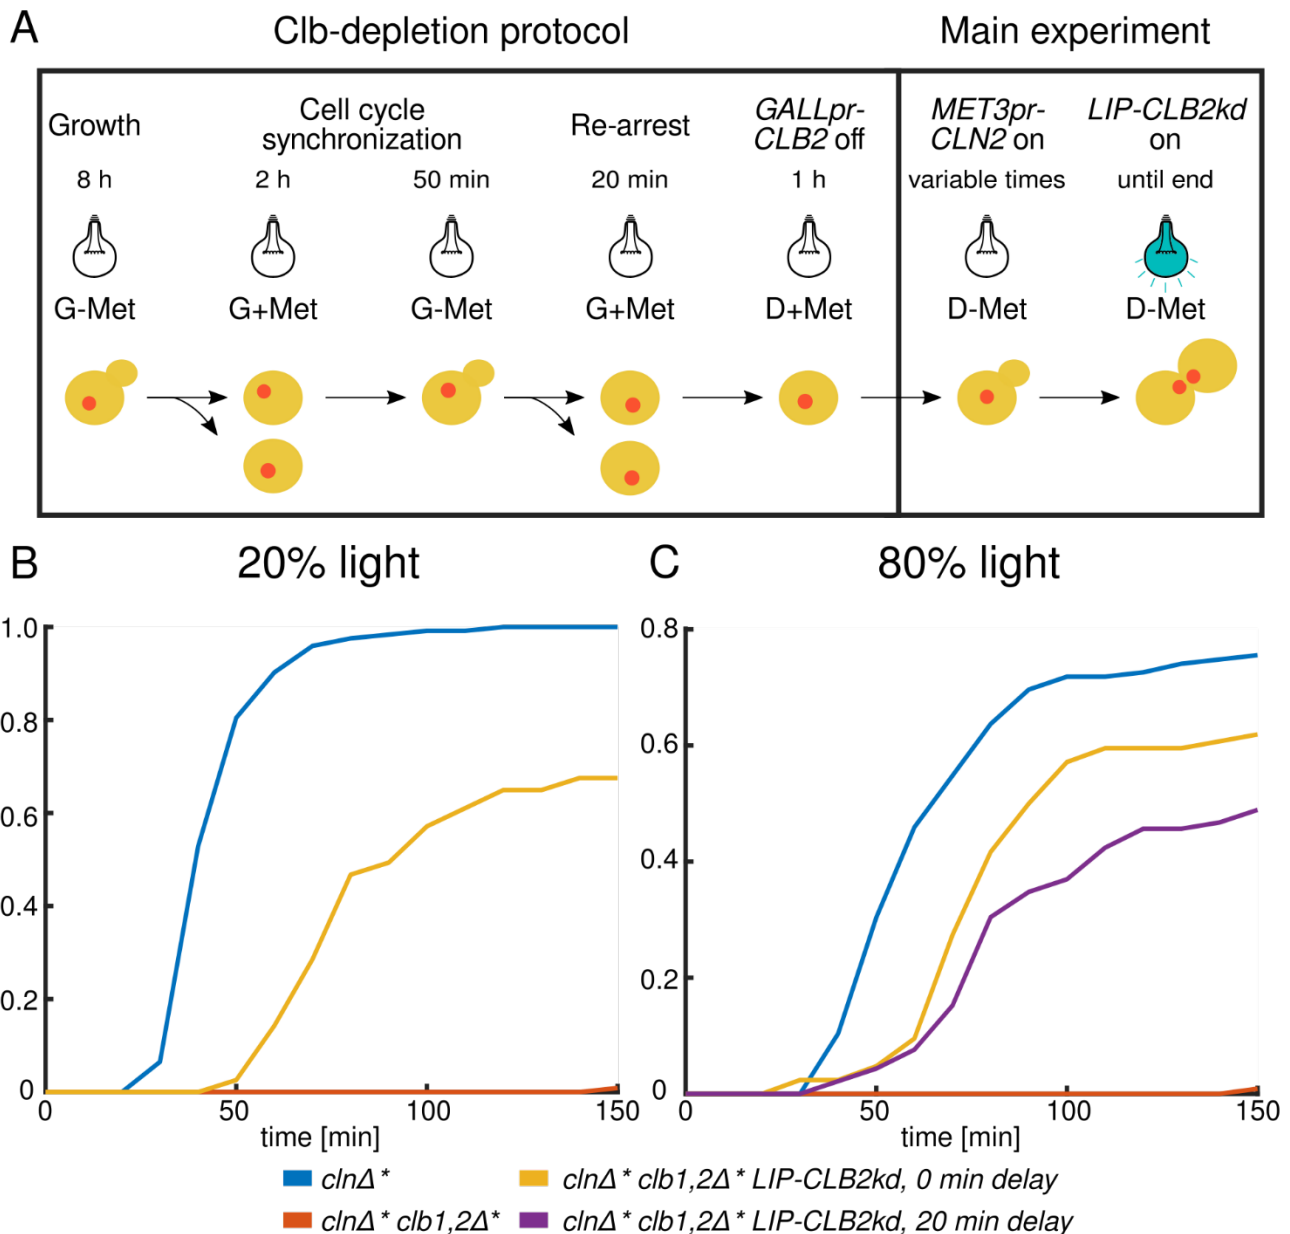

723  
 724 Figure 15. Independent triggering of cell cycle Start and mitosis to simulate wild-type timing. A: Illustration of the  
 725 protocol. B: Budding-to-anaphase duration with 20% diascopic light intensity. C: Budding-to-anaphase duration  
 726 with 80% light intensity. *clnΔ\** denotes *clnΔ MET3pr-CLN2pr* while *clb1,2Δ\** denotes *clb1,2Δ GALL-CLB2*. The same  
 727 experiment with control *clnΔ\* clb1,2Δ\** cells (without the *LIP-CLB2kd* construct) is shown in panels B and C.  
 728 Number of scored cells shown in Supplementary Table 18.

729 Before inducing *LIP-CLB2kd*, we ran cells through a sequence of media switches designed to  
 730 deplete the Clb2 protein expressed from *GALL-CLB2*. We call these steps the Clb-depletion protocol<sup>114</sup>  
 731 (Fig. 15 A): After growing cells in G-Met (synthetic complete medium containing galactose and no  
 732 methionine) medium, where the *MET3pr-CLN2* and *GALL-CLB2* constructs kept cells viable, we  
 733 synchronized the population by switching the medium to G+Met (in which cells arrest in G1) for 2 h.  
 734 Then, the medium was switched back to G-Met for 50 min, and cells restarted the cell cycle. After this,  
 735 *MET3pr-CLN2* was turned off to prevent a second cycle, and after 20 min, *GALL-CLB2* was turned off by  
 736 switching to medium that contains glucose instead of galactose, roughly at the end of mitosis to coincide  
 737 with the time of activation of the Clb inhibitors Cdh1 and Sic1. After Clb depletion, we released cells from  
 738 the G1 arrest by switching the medium from +Met to -Met and began the main experiment by turning on  
 739 the light source, which activated the *LIP-CLB2kd* construct.

740 We varied *LIP-CLB2kd* expression by changing the light intensity that cells were exposed to and  
741 by changing the delay between the –Met pulse, which triggered entry into the cell cycle, and the light  
742 pulse, which triggered mitotic entry. Given that the presence of Clb2 around Start is known to block  
743 budding<sup>115</sup>, we started the induction of *LIP-CLB2kd* either after or at the same time as *MET-CLN2*. To  
744 monitor the dynamics of the cell cycle, we included the fluorescently labeled *HTB2-mCherry*<sup>116</sup> construct  
745 in our strains, which marked the position of the nucleus throughout the cell cycle. For cell cycle timing,  
746 we measured the time from bud appearance to the separation of the fluorescently labeled nuclei in  
747 anaphase.

748 First, we applied 20% of the maximal light intensity to induce *LIP-CLB2kd* expression (Fig. 15 B)  
749 simultaneously with *MET3pr-CLN2* activation. Around 60% of cells with the *LIP-CLB2kd* construct that  
750 budded successfully finished mitosis. The effect was due to timely expression from the *LIP-CLB2kd*  
751 construct since residual Clb2 from the *GALL-CLB2* construct was not enough to drive cells through  
752 mitosis; this was verified by detecting almost no nuclear divisions in cells without the *LIP-CLB2kd*  
753 construct (Fig. 15 B and C). The Clb-depletion protocol had indeed removed Clb proteins effectively.  
754 However, their speed was slower than cells with wild-type *CLB1,2* (difference of the mean: 39.7 min).

755 In order to observe the effects of stronger *LIP-CLB2kd* induction, we applied light with 80% of  
756 the maximal intensity (Fig. 15 C) simultaneously with *MET3pr-CLN2* activation. This decreased the  
757 difference in time from bud emergence to nuclear separation compared to wild-type *CLB1,2* (difference  
758 of the mean: 16.8 min) with the proportion of *clnΔ\* clb1,2Δ\* LIP-CLB2kd* cells that finish mitosis similar  
759 to the experiment with 20% light intensity. Also, we could modulate the dynamics of mitosis progression  
760 by delaying the *LIP-CLB2kd* pulse relative to the *MET3pr-CLN2* pulse by +20 min. However, the  
761 proportion of wild-type *CLB1,2* cells that finished mitosis in the presence of 80% light was reduced, from  
762 around 100% in the presence of 20% light to around 75% in the presence of 80% light. This suggests that  
763 the higher intensity of light was toxic for cycling cells. Thus, different underlying effects may cause cells  
764 with the *LIP-CLB2kd* construct to not finish mitosis with 20% or 80% light: inappropriate rate or timing  
765 of the *CLB2kd* pulse in the former case and light toxicity in the latter.

## 766 Discussion

767 Quantitative characterizations of inducible systems are needed to guide experimental designs.  
768 Here, we systematically and comprehensively benchmarked the characteristics of inducible systems in  
769 budding yeast. For some inducible systems, the level of activity is known to depend on the level of the  
770 inducer. Given that the input-output relationships for most of the tunable systems investigated here are  
771 known to be highly sigmoidal<sup>40,75,117</sup>, we focused on the characterization of the systems' dynamic  
772 properties, not steady-state dose-response relationships.

773 We showed that the maximal levels of induction of these systems span a >50 fold range, suggesting  
774 that the library described here is diverse enough to guide different choices of inducible systems, at least,  
775 with respect to induction strength. With kinetic and steady-state parameters taken together, none of the  
776 tested systems performed optimally, emphasizing the need for the multidimensional characterization and  
777 the need for the development of novel tools for the precise dynamic control of cellular processes.

778 Although the naturally occurring yeast promoters can impose pleiotropic effects, our analysis of  
779 fundamental leakiness shows that, in cases where there are molecular mechanisms that actively inhibit  
780 their transcription (such as for *GAL1pr* and *MET3pr*), these promoters can exhibit substantially lower  
781 leakiness than other systems. This also validates the strategy for reducing leakiness of synthetic promoters

782 by borrowing the regulatory sequences that keep the naturally occurring promoters off, as in the case for  
783 *GLIP*. However, to achieve orthogonality of leakiness to metabolism, more elaborate constructs are  
784 needed, such as the synthetic systems that repress the transcription of their own activators, as in the newly  
785 developed self-repressible Tet-Off system<sup>118</sup>.

786 A benchmark has the benefit of making the characteristics of a comprehensive set of inducible  
787 systems that different subgroups of researchers may or may not know about, in principle, known to all. In  
788 addition, the quantitative nature of our benchmark, using an intuitive unit of activity (maxGAL1), enables  
789 more precise experiments. So, even some of the better known shortcomings of inducible transcriptional  
790 systems, e.g., the carbon source-dependent decrease of growth rates (*GAL* systems) and the high leakiness  
791 of the tetracycline-inducible system, can be accounted for precisely now. For example, the tetracycline-  
792 inducible system in its 'off' state can be used as a constitutive promoter that is roughly as strong as *GALL*  
793 in the 'on' state. Furthermore, at a qualitative level, many features of the systems we analyzed were  
794 unpublished, for example, the two-step activation of *PHO5pr*, small dynamic range of *CUP1pr*, long time  
795 delay after deactivation of *tetO* and Z3EV, non-monotonic activation of *MET3pr* and *GALL*, high  
796 stochasticity of PhyB-PIF3 and *PHO5pr*, and high relative leakiness of PhyB-PIF3 and *CUP1pr*.

797 The analysis of some of the inducible systems also adds to the description of their mechanisms.  
798 We worked out the different levels and sources of the *GAL1*-based promoters' leakiness. For example, we  
799 demonstrated that *GLIP* as a synthetic *GAL1*-based system is affected by the carbon source and requires  
800 glucose to keep it tightly off. Furthermore, by inducing *MET3pr* in a strain lacking Met17, an enzyme in  
801 the methionine biosynthetic pathway, we showed that the internal production of methionine contributes  
802 to the decline in *MET3pr* activity in the absence of external methionine. Through a comparison of the  
803 transcriptional Gal4-based PhyB-PIF3 system with the PhyB-PIF3 system for subcellular localization, we  
804 found that the large noise levels come from the Gal4 functionality, not the interaction of PhyB and PIF3.

805 We introduced strongLOV, a mutant El222 transcription factor that requires less light for the same  
806 level of activity and thus could reduce phototoxicity. As the El222 optogenetic system is extensively used  
807 in organisms other than budding yeast such as mammalian cell lines<sup>119</sup>, bacteria<sup>120</sup>, zebrafish<sup>58</sup>, and  
808 plants<sup>121</sup>, the new mutation described here ought to be useful for light control experiments in different  
809 fields of biology, as well as contribute to further understanding of LOV-domain proteins photochemistry.

810 The comparatively little explored *ARG3* promoter showed an interesting OR gate behavior as well  
811 as the opposite activation with respect to methionine compared to *MET3pr*. Although dynamic control  
812 using *ARG3pr* may be impeded by its small dynamic range and high leakiness, its level of expression in  
813 the ON state is comparable to *MET3pr*, which is useful in scenarios where this is the physiological level  
814 of expression.

815 Lastly, we showed that with two fast-acting inducible systems, we could simulate the succession  
816 of cell cycle Start and mitosis with nearly wild-type timing.

## 817 Methods

### 818 Plasmid library construction

819 All plasmids were constructed and propagated using *E. Coli* DH5 $\alpha$ . DNA digestion and ligation were  
820 performed using restriction endonucleases and T4 DNA ligase from New England Biolabs (USA). The  
821 *promoter-yEVenus-PEST* library was constructed by cloning different promoter sequences upstream of  
822 the *yEVenus* ORF using *PacI* and *BamHI* restriction enzymes. All PCRs were performed with Phusion

823 Polymerase (New England Biolabs, USA). All constructs were verified by Sanger sequencing (Microsynth  
824 AG, Switzerland). Summary and details of the construction of plasmids used in the study are given in  
825 Supplementary Table 1.

## 826 **Strain construction**

827 Wild-type haploid *W303* budding yeast strains (*MATa ade2-1 leu2-3 ura3-1 trp1-1 his3- 11,15 can1-100*)  
828 were transformed with plasmids with the inducible *promoter-yEVENUS-PEST* constructs by digesting the  
829 plasmids with *StuI* endonuclease inside the *URA3* gene. Transformations were performed using the  
830 standard lithium acetate method<sup>122</sup> and transformed strains were selected using -Uracil dropout plates. For  
831 systems involving synthetic transcription factors (light-, doxycycline-, and estradiol-inducible systems),  
832 constructs encoding transcription factors were transformed in a strain of the opposite mating type from  
833 the strain containing the *promoter-yEVENUS-PEST* construct and the transcription factor plasmids were  
834 integrated into the *HIS3* locus. The two strains were then crossed and the resulting progeny that contained  
835 both transcription factor and *promoter-yEVENUS-PEST* constructs were selected and used in further  
836 experiments. Plasmid integration and construct activity were verified by fluorescence microscopy after  
837 the appropriate induction of the constructs. Strains that showed fluorescence were screened for single-  
838 copy integrations using polymerase chain reaction (PCR) with primer sets that allowed one or several  
839 copies of the construct in the genome to be distinguished (Supplementary Note 4). Some researchers used  
840 the Gal4-based PhyB-PIF3 system in the *gal4Δ gal80Δ* background<sup>54,55</sup>. However, the system is shown to  
841 work well also in the absence of these two deletions<sup>123</sup>, and in our experiments we opted for the simpler  
842 version with the endogenous copies of *GAL4* and *GAL80* present. To remove the *PEST* sequence from  
843 strains that had the *promoter-yEVENUS-PEST-ADHI1t* construct, we created a *KanMX*-marked plasmid  
844 (pVG97) that, when cut with the *AfeI* restriction enzyme and used to transform strains with the *promoter-*  
845 *yEVENUS-PEST::URA3* construct results in genomic *promoter-yEVENUS-ADHI1t*. *PEST* removal was  
846 confirmed by the absence of the functional *URA3* copy and by PCR in all constructed strains. Summary  
847 and details of the strain construction used in this study are given in Supplementary Table 2.

## 848 **Media and growth conditions**

849 Cells were grown in CellASIC ONIX microfluidic plates for haploid yeast cells in media controlled by the  
850 ONIX2 microfluidics system (Merck, Germany). Details regarding the composition of the media used for  
851 different promoter induction experiments are given in Supplementary Note 1.

852 For experiments with light-induced *CLB2kd*, cells were first grown in G-M medium from a single  
853 cell to a colony for 8-12 h. After that, to ensure that no left-over Clb2 would affect the cell cycle in which  
854 the *LIP-CLB2kd* construct was induced, the Clb-depletion protocol<sup>114</sup> was applied as described in the main  
855 text.

## 856 **Microscopy**

857 Images were recorded using a Nikon Ti2-E microscope equipped with a 60x objective and a Hamamatsu  
858 Orca-Flash 4.0 camera. The microscope was operated using NIS-Elements software and the objective's  
859 axial position was controlled by the Nikon Perfect Focus System. To reduce photobleaching of the  
860 fluorescent protein, images were taken every 10 min with 100 ms exposure time.

## 861 **Image analysis**

862 Image analysis was performed using YeaZ, a Python-based tool for yeast cell segmentation<sup>34</sup>. Briefly, we  
863 first determined the boundaries of cells in phase-contrast images. The levels of fluorescence for each cell

864 were then calculated as an average of the pixel intensities in the yellow fluorescence channel for pixels  
865 that were within the cell boundaries. For further analyses, we subtracted the autofluorescence of  
866 unlabeled wild-type cells from the fluorescence values of *promoter-yEVENUS-PEST* carrying cells.

## 867 Data analysis and modeling of gene expression

868 To extract parameters for the systems' kinetic properties, we compared the single-cell expression data with  
869 a minimal model presented in Fig. 5 A. After solving the equations of the model, we obtained:

$$870 \quad F_{ON}(t) = \frac{f i + b}{d f + d} - \frac{i}{d(d + f)} e^{-d(t-t_{on})} (f + d(1 - e^{-f(t-t_{on})})), \quad t \geq 0$$

$$871 \quad F_{OFF}(t) = \frac{f b}{d f + d} + \frac{i}{d(d + f)} e^{-d(t-t_{off})} (f + d(1 - f e^{-f(t-t_{off})})), \quad t \geq 3.5h$$

872 To simplify the fitting procedure, we further reduced the complexity of the two functions  $F_{ON}(t)$  and  
873  $F_{OFF}(t)$  by expanding them in Taylor series and keeping only the first two terms:

$$874 \quad \tilde{F}_{ON}(t) = \frac{f b}{d d + f} + \frac{if}{2} (t - t_{on})^2, \quad t \geq 0$$

$$875 \quad \tilde{F}_{OFF}(t) = \frac{f b + i}{d d + f} - \frac{if}{2} (t - t_{off})^2, \quad t \geq 3.5 h$$

876 Based on  $\tilde{F}_{ON}(t)$  and  $\tilde{F}_{OFF}(t)$ , we could extract the induction parameters unambiguously. First, we  
877 extracted the term describing basal activity of the inducible transcriptional system,  $\frac{f b}{d d + f}$ , using the  
878 fluorescence values during the time prior to the induction (from  $t = -60$  min to  $t = 0$  min) for most of the  
879 systems, or at timepoint  $t = 0$  h for the optogenetic systems *LIP*, *GLIP*, and PhyB-PIF3. Next, we fitted the  
880 part of the curve around the start of the induction period; this allowed us to extract the initial speed of the  
881 induction  $i$  and the delay of the transcriptional induction  $t_{on}$ . To unambiguously extract  $i$  and  $t_{on}$  from  
882 the second term of the Taylor expansion, we used a fixed value for the yEVENUS maturation time  $f$  that we  
883 measured in an independent experiment (Supplementary Note 2). For most inducible systems, we fitted  
884 the timepoints from  $t = -50$  min to  $t = 50$  min. Exceptions were *GALL*, *CUP1pr*, which start showing non-  
885 monotonic activation soon after the initial rise and for which we used timepoints from  $t = -50$  min to  $t =$   
886  $30$  min. For PhyB-PIF3, which turned on very slowly, we used timepoints from  $t = 0$  to  $t = 60$  min. For  
887 *LIP* and *GLIP*, we fitted the expression values from  $t = 0$  min to  $t = 50$  min. To extract  $t_{off}$ , we fitted the  
888 fluorescence values after removal of the inducer. For this, we used timepoints from  $t = 210$  min to  $270$   
889 min. Next, we extracted the degradation-and-dilution rate  $d$  from the part of the plots in Fig. 2 that  
890 correspond to the decay of the fluorescent protein by fitting to an exponential decay function. For this,  
891 we used the timepoints starting from an hour after the circuit was switched off, which is roughly four  
892 maturation half-times,  $\ln(2)/f$  so that the exponential term in  $f$  became negligible. That is, we used  
893 timepoints from  $t = 270$  min to  $t = 390$  min. Finally, to extract the basal activity parameter  $b$  from the  
894 fitted  $\frac{f b}{d d + f}$  term of the Taylor expansion of the turn-on dynamics, we used the previously extracted  
895 parameter  $d$ . We note that since  $d$  was close to zero for the two systems that do not turn off well (*Z3EV*  
896 and PhyB-PIF3), the extracted parameter  $b$  might not represent the systems' leakiness well. However, we  
897 show their fundamental leakiness in maxGAL1 units in Fig. 5 E and Fig. 6 A. The model fits were obtained  
898 by minimizing the sum of the squared residuals using the `fminsearch` function in Matlab 2019a. The matlab



899 code to carry out these fits is made available as detailed in Code Availability below. For examples of fits of  
900 single-cell time courses, see Supplementary Fig. 5.

901 For making violin plots, we used a bandwidth of  $1.06 \frac{\text{std}}{\sqrt[5]{n}}$ , as suggested in ref.<sup>124</sup> (std - the standard  
902 deviation, n - the number of elements in the set).

## 903 Author contributions

904 VG performed microscopy experiments. VG and AS analyzed the microscopy data. VG performed  
905 modelling and analyzed the results. VG created genetic constructs and strains. VG and SJR wrote the  
906 manuscript. SJR supervised the work.

## 907 Acknowledgment

908 We thank Dr. Enrico Tenaglia, and Roxane Dervev for help with the experiments and media preparation;  
909 Prof. Sebastian Maerkl, Dr. Evan Olson, and Shiyu Cheng for help with preparation of media for *PHO5pr*  
910 induction; Prof. Mustafa Khammash and Dr. Dirk Benzinger for providing plasmids and technical advice  
911 on the optogenetics measurements; Prof. Anton Khmelinskii for providing the strains with fluorescently  
912 labeled Arg3; Prof. José L. Avalos and Dr. Evan Zhao for providing *EL222* plasmids; Prof. Attila Becskei  
913 for providing the plasmid with *tetO* and *rtTA*; Prof. David Botstein for providing plasmids with the *Z3EV*  
914 system; and Prof. Peter Quail for providing plasmids with *PhyB-PIF3*.

## 915 Competing interests

916 The authors declare to have no competing interests.

## 917 Code availability

918 The code generated for this study can be found at [https://github.com/lpbsscientist/promoter-benchmark-](https://github.com/lpbsscientist/promoter-benchmark-model)  
919 [model](https://github.com/lpbsscientist/promoter-benchmark-model) .

## 920 Data availability

921 Plasmids generated in the study are deposited with Addgene ([www.addgene.org](http://www.addgene.org)). Strains generated in the  
922 study are deposited with National BioResource Project – Yeast database (<https://yeast.nig.ac.jp/yeast/>). The  
923 data generated in the study (coarse-grained parameters and single-cell data) are available at  
924 <https://promoter-benchmark.epfl.ch/> .

## 925 References

- 926 1. Becskei, A., Séraphin, B. & Serrano, L. Positive feedback in eukaryotic gene networks: cell  
927 differentiation by graded to binary response conversion. *EMBO J.* **20**, 2528–2535 (2001).
- 928 2. Elowitz, M. B., Levine, A. J., Siggia, E. D. & Swain, P. S. Stochastic gene expression in a single cell.  
929 *Science* **297**, 1183–1186 (2002).
- 930 3. Rahi, S. J., Larsch, J., Pecani, K., Katsov, A. Y., Mansouri, N., Tsaneva-Atanasova, K., Sontag, E. D. &  
931 Cross, F. R. Oscillatory stimuli differentiate adapting circuit topologies. *Nat. Methods* **14**, 1010–1016  
932 (2017).

- 933 4. Witte, K., Strickland, D. & Glotzer, M. Cell cycle entry triggers a switch between two modes of Cdc42  
934 activation during yeast polarization. *eLife* **6**, e26722 (2017).
- 935 5. Liang, Z., Sunder, S., Nallasivam, S. & Wilson, T. E. Overhang polarity of chromosomal double-strand  
936 breaks impacts kinetics and fidelity of yeast non-homologous end joining. *Nucleic Acids Res.* **44**, 2769–  
937 2781 (2016).
- 938 6. Zhao, E. M., Zhang, Y., Mehl, J., Park, H., Lalwani, M. A., Toettcher, J. E. & Avalos, J. L. Optogenetic  
939 regulation of engineered cellular metabolism for microbial chemical production. *Nature* **555**, 683–687  
940 (2018).
- 941 7. DeJong, J. M., Liu, Y., Bollon, A. P., Long, R. M., Jennewein, S., Williams, D. & Croteau, R. B. Genetic  
942 engineering of taxol biosynthetic genes in *Saccharomyces cerevisiae*. *Biotechnol. Bioeng.* **93**, 212–224  
943 (2006).
- 944 8. Ro, D.-K., Paradise, E. M., Ouellet, M., Fisher, K. J., Newman, K. L., Ndungu, J. M., Ho, K. A., Eachus, R.  
945 A., Ham, T. S., Kirby, J., Chang, M. C. Y., Withers, S. T., Shiba, Y., Sarpong, R. & Keasling, J. D.  
946 Production of the antimalarial drug precursor artemisinic acid in engineered yeast. *Nature* **440**, 940–  
947 943 (2006).
- 948 9. Elowitz, M. B. & Leibler, S. A synthetic oscillatory network of transcriptional regulators. *Nature* **403**,  
949 335–338 (2000).
- 950 10. Gardner, T. S., Cantor, C. R. & Collins, J. J. Construction of a genetic toggle switch in *Escherichia coli*.  
951 *Nature* **403**, 339–342 (2000).
- 952 11. Lindstrom, D. L. & Gottschling, D. E. The mother enrichment program: A genetic system for facile  
953 replicative life span analysis in *Saccharomyces cerevisiae*. *Genetics* **183**, 413–422 (2009).
- 954 12. Blount, B. A., Weenink, T. & Ellis, T. Construction of synthetic regulatory networks in yeast. *FEBS Lett.*  
955 **586**, 2112–2121 (2012).
- 956 13. Morawska, M. & Ulrich, H. D. An expanded tool kit for the auxin-inducible degron system in budding  
957 yeast: A tool kit for the AID system. *Yeast* **30**, 341–351 (2013).
- 958 14. Portela, R. M. C., Vogl, T., Kniely, C., Fischer, J. E., Oliveira, R. & Glieder, A. Synthetic core promoters as  
959 universal parts for fine-tuning expression in different yeast species. *ACS Synth. Biol.* **6**, 471–484  
960 (2017).
- 961 15. Hong, K.-K. & Nielsen, J. Metabolic engineering of *Saccharomyces cerevisiae*: a key cell factory  
962 platform for future biorefineries. *Cell. Mol. Life Sci.* **69**, 2671–2690 (2012).
- 963 16. Da Silva, N. A. & Srikrishnan, S. Introduction and expression of genes for metabolic engineering  
964 applications in *Saccharomyces cerevisiae*. *FEMS Yeast Res.* **12**, 197–214 (2012).
- 965 17. Belli, G., Garí, E., Piedrafita, L., Aldea, M. & Herrero, E. An activator/repressor dual system allows tight  
966 tetracycline-regulated gene expression in budding yeast. *Nucleic Acids Res.* **26**, 942–947 (1998).
- 967 18. Ottoz, D. S. M., Rudolf, F. & Stelling, J. Inducible, tightly regulated and growth condition-independent  
968 transcription factor in *Saccharomyces cerevisiae*. *Nucleic Acids Res.* **42**, e130–e130 (2014).

- 969 19. Mclsaac, R. S., Gibney, P. A., Chandran, S. S., Benjamin, K. R. & Botstein, D. Synthetic biology tools for  
970 programming gene expression without nutritional perturbations in *Saccharomyces cerevisiae*. *Nucleic*  
971 *Acids Res.* **42**, e48–e48 (2014).
- 972 20. Mclsaac, R. S., Oakes, B. L., Wang, X., Dummit, K. A., Botstein, D. & Noyes, M. B. Synthetic gene  
973 expression perturbation systems with rapid, tunable, single-gene specificity in yeast. *Nucleic Acids*  
974 *Res.* **41**, e57–e57 (2013).
- 975 21. de Mena, L., Rizk, P. & Rincon-Limas, D. E. Bringing light to transcription: the optogenetics repertoire.  
976 *Front. Genet.* **9**, 518 (2018).
- 977 22. Olson, E. J. & Tabor, J. J. Optogenetic characterization methods overcome key challenges in synthetic  
978 and systems biology. *Nat. Chem. Biol.* **10**, 502–511 (2014).
- 979 23. Roggenkamp, E., Giersch, R. M., Wedeman, E., Eaton, M., Turnquist, E., Schrock, M. N., Alkotami, L.,  
980 Jirakittisonthon, T., Schluter-Pascua, S. E., Bayne, G. H., Wasko, C., Halloran, M. & Finnigan, G. C.  
981 CRISPR-UnLOCK: Multipurpose Cas9-based strategies for conversion of yeast libraries and strains.  
982 *Front. Microbiol.* **8**, 1773 (2017).
- 983 24. Sadeghi, A., Dervev, R., Gligorovski, V., Labagnara, M. & Rahi, S. J. The optimal strategy balancing risk  
984 and speed predicts DNA damage checkpoint override times. *Nat. Phys.* (2022). doi:10.1038/s41567-  
985 022-01601-3
- 986 25. Zhao, E. M., Lalwani, M. A., Lovelett, R. J., García-Echauri, S. A., Hoffman, S. M., Gonzalez, C. L.,  
987 Toettcher, J. E., Kevrekidis, I. G. & Avalos, J. L. Design and characterization of rapid optogenetic  
988 circuits for dynamic control in yeast metabolic engineering. *ACS Synth. Biol.* acssynbio.0c00305  
989 (2020). doi:10.1021/acssynbio.0c00305
- 990 26. Qi, L. S., Larson, M. H., Gilbert, L. A., Doudna, J. A., Weissman, J. S., Arkin, A. P. & Lim, W. A.  
991 Repurposing CRISPR as an RNA-guided platform for sequence-specific control of gene expression. *Cell*  
992 **152**, 1173–1183 (2013).
- 993 27. Labow, M. A., Baim, S. B., Shenk, T. & Levine, A. J. Conversion of the lac repressor into an allosterically  
994 regulated transcriptional activator for mammalian cells. *Mol. Cell. Biol.* **10**, 3343–3356 (1990).
- 995 28. Zalatan, J. G., Lee, M. E., Almeida, R., Gilbert, L. A., Whitehead, E. H., La Russa, M., Tsai, J. C.,  
996 Weissman, J. S., Dueber, J. E., Qi, L. S. & Lim, W. A. Engineering complex synthetic transcriptional  
997 programs with CRISPR RNA scaffolds. *Cell* **160**, 339–350 (2015).
- 998 29. Benzinger, D. & Khammash, M. Pulsatile inputs achieve tunable attenuation of gene expression  
999 variability and graded multi-gene regulation. *Nat. Commun.* **9**, 3521 (2018).
- 1000 30. Balleza, E., Kim, J. M. & Cluzel, P. Systematic characterization of maturation time of fluorescent  
1001 proteins in living cells. *Nat. Methods* **15**, 47–51 (2018).
- 1002 31. Cranfill, P. J., Sell, B. R., Baird, M. A., Allen, J. R., Lavagnino, Z., de Gruiter, H. M., Kremers, G.-J.,  
1003 Davidson, M. W., Ustione, A. & Piston, D. W. Quantitative assessment of fluorescent proteins. *Nat.*  
1004 *Methods* **13**, 557–562 (2016).

- 1005 32. Guerra, P., Vuilleminot, L.-A., Rae, B., Ladyhina, V. & Miliadis-Argeitis, A. Systematic *in vivo*  
1006 characterization of fluorescent protein maturation in budding yeast. *ACS Synth. Biol.*  
1007 *acssynbio.1c00387* (2022). doi:10.1021/acssynbio.1c00387
- 1008 33. Botman, D., de Groot, D. H., Schmidt, P., Goedhart, J. & Teusink, B. *In vivo* characterisation of  
1009 fluorescent proteins in budding yeast. *Sci. Rep.* **9**, 2234 (2019).
- 1010 34. Dietler, N., Minder, M., Gligorovski, V., Economou, A. M., Joly, D. A. H. L., Sadeghi, A., Chan, C. H. M.,  
1011 Koziński, M., Weigert, M., Bitbol, A.-F. & Rahi, S. J. A convolutional neural network segments yeast  
1012 microscopy images with high accuracy. *Nat. Commun.* **11**, 5723 (2020).
- 1013 35. Galbusera, L., Bellement-Theroue, G., Urchueguia, A., Julou, T. & van Nimwegen, E. Using  
1014 fluorescence flow cytometry data for single-cell gene expression analysis in bacteria. *PLOS ONE* **15**,  
1015 e0240233 (2020).
- 1016 36. Douglas, H. C. & Hawthorne, D. C. Enzymatic expression and genetic linkage of genes controlling  
1017 galactose utilization in *Saccharomyces*. *Genetics* **49**, 837–844 (1964).
- 1018 37. Bassel, J. & Mortimer, R. Genetic order of the galactose structural genes in *Saccharomyces cerevisiae*.  
1019 *J. Bacteriol.* **108**, 179–183 (1971).
- 1020 38. Ostergaard, S., Waløe, K. O., Gomes, C. S. G., Olsson, L. & Nielsen, J. The impact of *GAL6*, *GAL80*, and  
1021 *MIG1* on glucose control of the *GAL* system in *Saccharomyces cerevisiae*. *FEMS Yeast Res.* **1**, 47–55  
1022 (2001).
- 1023 39. Adams, B. G. Induction of galactokinase in *Saccharomyces cerevisiae*: Kinetics of Induction and  
1024 Glucose Effects. *J. Bacteriol.* **111**, 308–315 (1972).
- 1025 40. Mumberg, D., Muller, R. & Funk, M. Regulatable promoters of *Saccharomyces cerevisiae*: comparison  
1026 of transcriptional activity and their use for heterologous expression. *Nucleic Acids Res.* **22**, 5767–5768  
1027 (1994).
- 1028 41. Cherest, H., Eichler, F. & de Robichon-Szulmajster, H. Genetic and regulatory aspects of methionine  
1029 biosynthesis in *Saccharomyces cerevisiae*. *J. Bacteriol.* **97**, 328–336 (1969).
- 1030 42. Gierest, H., Thao, N. N. & Surdin-Kerjan, Y. Transcriptional regulation of the *MET3* gene of  
1031 *Saccharomyces cerevisiae*. *Gene* **34**, 269–281 (1985).
- 1032 43. Charvin, G., Cross, F. R. & Siggia, E. D. A microfluidic device for temporally controlled gene expression  
1033 and long-term fluorescent imaging in unperturbed dividing yeast cells. *PLoS ONE* **3**, e1468 (2008).
- 1034 44. Amon, A., Irniger, S. & Nasmyth, K. Closing the cell cycle circle in yeast: G2 cyclin proteolysis initiated  
1035 at mitosis persists until the activation of G1 cyclins in the next cycle. *Cell* **77**, 1037–1050 (1994).
- 1036 45. Talia, S. D., Skotheim, J. M., Bean, J. M., Siggia, E. D. & Cross, F. R. The effects of molecular noise and  
1037 size control on variability in the budding yeast cell cycle. *Nature* **448**, 947–951 (2007).
- 1038 46. Chen, K. C., Calzone, L., Csikasz-Nagy, A., Cross, F. R., Novak, B. & Tyson, J. J. Integrative analysis of cell  
1039 cycle control in budding yeast. *Mol. Biol. Cell* **15**, 3841–3862 (2004).

- 1040 47. Lew, D. J. & Reed, S. I. Morphogenesis in the yeast cell cycle: regulation by Cdc28 and cyclins. *J. Cell*  
1041 *Biol.* **120**, 1305–1320 (1993).
- 1042 48. Fürst, P., Hu, S., Hackett, R. & Hamer, D. Copper activates metallothionein gene transcription by  
1043 altering the conformation of a specific DNA binding protein. *Cell* **55**, 705–717 (1988).
- 1044 49. Mascorro-Gallardo, J. O., Covarrubias, A. A. & Gaxiola, R. Construction of a *CUP1* promoter-based  
1045 vector to modulate gene expression in *Saccharomyces cerevisiae*. *Gene* **172**, 169–170 (1996).
- 1046 50. Korber, P. & Barbaric, S. The yeast PHO5 promoter: from single locus to systems biology of a paradigm  
1047 for gene regulation through chromatin. *Nucleic Acids Res.* **42**, 10888–10902 (2014).
- 1048 51. Lenburg, M. & Oshea, E. Signaling phosphate starvation. *Trends Biochem. Sci.* **21**, 383–387 (1996).
- 1049 52. Thomas, M. R. & O’Shea, E. K. An intracellular phosphate buffer filters transient fluctuations in  
1050 extracellular phosphate levels. *Proc. Natl. Acad. Sci.* **102**, 9565–9570 (2005).
- 1051 53. Meyer-Ficca, M. L., Meyer, R. G., Kaiser, H., Brack, A. R., Kandolf, R. & Küpper, J.-H. Comparative  
1052 analysis of inducible expression systems in transient transfection studies. *Anal. Biochem.* **334**, 9–19  
1053 (2004).
- 1054 54. Shimizu-Sato, S., Huq, E., Tepperman, J. M. & Quail, P. H. A light-switchable gene promoter system.  
1055 *Nat. Biotechnol.* **20**, 1041–1044 (2002).
- 1056 55. Pathak, G. P., Strickland, D., Vrana, J. D. & Tucker, C. L. Benchmarking of optical dimerizer systems.  
1057 *ACS Synth. Biol.* **3**, 832–838 (2014).
- 1058 56. Quail, P. H. Phytochromes. *Curr. Biol.* **20**, R504–R507 (2010).
- 1059 57. Motta-Mena, L. B., Reade, A., Mallory, M. J., Glantz, S., Weiner, O. D., Lynch, K. W. & Gardner, K. H. An  
1060 optogenetic gene expression system with rapid activation and deactivation kinetics. *Nat. Chem. Biol.*  
1061 **10**, 196–202 (2014).
- 1062 58. Reade, A., Motta-Mena, L. B., Gardner, K. H., Stainier, D. Y., Weiner, O. D. & Woo, S. TAE1: A zebrafish-  
1063 optimized optogenetic gene expression system with fine spatial and temporal control. *Development*  
1064 dev.139238 (2016). doi:10.1242/dev.139238
- 1065 59. Zoltowski, B. D., Motta-Mena, L. B. & Gardner, K. H. Blue light-induced dimerization of a bacterial  
1066 LOV–HTH DNA-binding protein. *Biochemistry* **52**, 6653–6661 (2013).
- 1067 60. Nagai, T., Ibata, K., Park, E. S., Kubota, M., Mikoshiba, K. & Miyawaki, A. A variant of yellow  
1068 fluorescent protein with fast and efficient maturation for cell-biological applications. *Nat. Biotechnol.*  
1069 **20**, 87–90 (2002).
- 1070 61. Mateus, C. & Avery, S. V. Destabilized green fluorescent protein for monitoring dynamic changes in  
1071 yeast gene expression with flow cytometry. *Yeast Chichester Engl.* **16**, 1313–1323 (2000).
- 1072 62. Mazo-Vargas, A., Park, H., Aydin, M. & Buchler, N. E. Measuring fast gene dynamics in single cells with  
1073 time-lapse luminescence microscopy. *Mol. Biol. Cell* **25**, 3699–3708 (2014).

- 1074 63. Wu, X.-L., Li, B.-Z., Zhang, W.-Z., Song, K., Qi, H., Dai, J. & Yuan, Y.-J. Genome-wide landscape of  
1075 position effects on heterogeneous gene expression in *Saccharomyces cerevisiae*. *Biotechnol. Biofuels*  
1076 **10**, 189 (2017).
- 1077 64. Bai Flagfeldt, D., Siewers, V., Huang, L. & Nielsen, J. Characterization of chromosomal integration sites  
1078 for heterologous gene expression in *Saccharomyces cerevisiae*. *Yeast* **26**, 545–551 (2009).
- 1079 65. Crook, N. C., Freeman, E. S. & Alper, H. S. Re-engineering multicloning sites for function and  
1080 convenience. *Nucleic Acids Res.* **39**, e92–e92 (2011).
- 1081 66. Curran, K. A., Karim, A. S., Gupta, A. & Alper, H. S. Use of expression-enhancing terminators in  
1082 *Saccharomyces cerevisiae* to increase mRNA half-life and improve gene expression control for  
1083 metabolic engineering applications. *Metab. Eng.* **19**, 88–97 (2013).
- 1084 67. Gordon, A., Colman-Lerner, A., Chin, T. E., Benjamin, K. R., Yu, R. C. & Brent, R. Single-cell  
1085 quantification of molecules and rates using open-source microscope-based cytometry. *Nat. Methods*  
1086 **4**, 175–181 (2007).
- 1087 68. Lee, M. E., DeLoache, W. C., Cervantes, B. & Dueber, J. E. A highly characterized yeast toolkit for  
1088 modular, multipart assembly. *ACS Synth. Biol.* **4**, 975–986 (2015).
- 1089 69. Brophy, J. A. N. & Voigt, C. A. Principles of genetic circuit design. *Nat. Methods* **11**, 508–520 (2014).
- 1090 70. Ratna, P. & Becskei, A. in *Yeast Genet. Netw.* (ed. Becskei, A.) **734**, 45–61 (Humana Press, 2011).
- 1091 71. Krebber, A., Burmester, J. & Plückthun, A. Inclusion of an upstream transcriptional terminator in  
1092 phage display vectors abolishes background expression of toxic fusions with coat protein g3p. *Gene*  
1093 **178**, 71–74 (1996).
- 1094 72. Song, W., Li, J., Liang, Q. & Marchisio, M. A. Can terminators be used as insulators into yeast synthetic  
1095 gene circuits? *J. Biol. Eng.* **10**, 19 (2016).
- 1096 73. Fischer, J. A., Giniger, E., Maniatis, T. & Ptashne, M. GAL4 activates transcription in *Drosophila*. *Nature*  
1097 **332**, 853–856 (1988).
- 1098 74. Kakidani, H. & Ptashne, M. GAL4 activates gene expression in mammalian cells. *Cell* **52**, 161–167  
1099 (1988).
- 1100 75. Peng, B., Williams, T. C., Henry, M., Nielsen, L. K. & Vickers, C. E. Controlling heterologous gene  
1101 expression in yeast cell factories on different carbon substrates and across the diauxic shift: a  
1102 comparison of yeast promoter activities. *Microb. Cell Factories* **14**, 91 (2015).
- 1103 76. Masselot, M. & de Robichon-Szulmajster, H. Methionine biosynthesis in *Saccharomyces cerevisiae*: I.  
1104 Genetical analysis of auxotrophic mutants. *Mol. Gen. Genet. MGG* **139**, 121–132 (1975).
- 1105 77. Van Oss, S. B., Parikh, S. B., Coelho, N. C., Wacholder, A., Belashov, I., Michaca, M., Xu, J., Kang, Y. P.,  
1106 McCourt, K. M., McKee, J., Ideker, T., VanDemark, A. P., DeNicola, G. M. & Carvunis, A.-R. *Unexpected*  
1107 *growth of a classic yeast auxotroph*. (Molecular Biology, 2022). doi:10.1101/2022.01.19.476918

- 1108 78. Giots, F., Donaton, M. C. V. & Thevelein, J. M. Inorganic phosphate is sensed by specific phosphate  
1109 carriers and acts in concert with glucose as a nutrient signal for activation of the protein kinase A  
1110 pathway in the yeast *Saccharomyces cerevisiae*. *Mol. Microbiol.* **47**, 1163–1181 (2003).
- 1111 79. Zoltowski, B. D., Nash, A. I. & Gardner, K. H. Variations in protein–flavin hydrogen bonding in a light,  
1112 oxygen, voltage domain produce non-arrhenius kinetics of adduct decay. *Biochemistry* **50**, 8771–8779  
1113 (2011).
- 1114 80. Flick, J. S. & Johnston, M. Two systems of glucose repression of the *GAL1* promoter in *Saccharomyces*  
1115 *cerevisiae*. *Mol. Cell. Biol.* **10**, 4757–4769 (1990).
- 1116 81. Sood, V. & Brickner, J. H. Genetic and epigenetic strategies potentiate Gal4 activation to enhance  
1117 fitness in recently diverged yeast species. *Curr. Biol.* **27**, 3591–3602.e3 (2017).
- 1118 82. Melcher, K. Gal80-Gal80 interaction on adjacent Gal4p binding sites is required for complete *GAL*  
1119 gene repression. *EMBO J.* **20**, 841–851 (2001).
- 1120 83. Roney, I. J., Rudner, A. D., Couture, J.-F. & Kærn, M. Improvement of the reverse tetracycline  
1121 transactivator by single amino acid substitutions that reduce leaky target gene expression to  
1122 undetectable levels. *Sci. Rep.* **6**, 27697 (2016).
- 1123 84. Carey, L. B., van Dijk, D., Sloom, P. M. A., Kaandorp, J. A. & Segal, E. Promoter sequence determines the  
1124 relationship between expression level and noise. *PLoS Biol.* **11**, e1001528 (2013).
- 1125 85. Sharon, E., van Dijk, D., Kalma, Y., Keren, L., Manor, O., Yakhini, Z. & Segal, E. Probing the effect of  
1126 promoters on noise in gene expression using thousands of designed sequences. *Genome Res.* **24**,  
1127 1698–1706 (2014).
- 1128 86. Bar-Even, A., Paulsson, J., Maheshri, N., Carmi, M., O’Shea, E., Pilpel, Y. & Barkai, N. Noise in protein  
1129 expression scales with natural protein abundance. *Nat. Genet.* **38**, 636–643 (2006).
- 1130 87. Shahrezaei, V. & Swain, P. S. The stochastic nature of biochemical networks. *Curr. Opin. Biotechnol.*  
1131 **19**, 369–374 (2008).
- 1132 88. Fascher, K.-D., Schmitz, J. & Hörz, W. Structural and functional requirements for the chromatin  
1133 transition at the *PHO5* promoter in *Saccharomyces cerevisiae* upon *PHO5* Activation. *J. Mol. Biol.* **231**,  
1134 658–667 (1993).
- 1135 89. Raser, J. M. & O’Shea, E. K. Control of stochasticity in eukaryotic gene expression. *Science* **304**, 1811–  
1136 1814 (2004).
- 1137 90. Messenguy, F. Regulation of arginine biosynthesis in *Saccharomyces cerevisiae*: isolation of a cis-  
1138 dominant, constitutive mutant for ornithine carbamoyltransferase synthesis. *J. Bacteriol.* **128**, 49–55  
1139 (1976).
- 1140 91. Bechet, J., Grenson, M. & Wiame, J. M. Mutations affecting the repressibility of arginine biosynthetic  
1141 enzymes in *Saccharomyces cerevisiae*. *Eur. J. Biochem.* **12**, 31–39 (1970).

- 1142 92. Natarajan, K., Meyer, M. R., Jackson, B. M., Slade, D., Roberts, C., Hinnebusch, A. G. & Marton, M. J.  
1143 Transcriptional profiling shows that Gcn4p is a master regulator of gene expression during amino acid  
1144 starvation in yeast. *Mol. Cell. Biol.* **21**, 4347–4368 (2001).
- 1145 93. Gasch, A. P., Spellman, P. T., Kao, C. M., Carmel-Harel, O., Eisen, M. B., Storz, G., Botstein, D. & Brown,  
1146 P. O. Genomic expression programs in the response of yeast cells to environmental changes. *Mol.*  
1147 *Biol. Cell* **11**, 4241–4257 (2000).
- 1148 94. Messenguy, F. & Dubois, E. Participation of transcriptional and post-transcriptional regulatory  
1149 mechanisms in the control of arginine metabolism in yeast. *Mol. Gen. Genet. MGG* **189**, 148–156  
1150 (1983).
- 1151 95. Meurer, M., Duan, Y., Sass, E., Kats, I., Herbst, K., Buchmuller, B. C., Dederer, V., Huber, F., Kirrmaier,  
1152 D., Štefl, M., Van Laer, K., Dick, T. P., Lemberg, M. K., Khmelinskii, A., Levy, E. D. & Knop, M. Genome-  
1153 wide C-SWAT library for high-throughput yeast genome tagging. *Nat. Methods* **15**, 598–600 (2018).
- 1154 96. Crabeel, M., Huygen, R., Verschueren, K., Messenguy, F., Tinel, K., Cunin, R. & Glansdorff, N. General  
1155 amino acid control and specific arginine repression in *Saccharomyces cerevisiae*: physical study of the  
1156 bifunctional regulatory region of the ARG3 gene. *Mol. Cell. Biol.* **5**, 3139–3148 (1985).
- 1157 97. Godard, P., Urrestarazu, A., Vissers, S., Kontos, K., Bontempi, G., van Helden, J. & André, B. Effect of  
1158 21 different nitrogen sources on global gene expression in the yeast *Saccharomyces cerevisiae*. *Mol.*  
1159 *Cell. Biol.* **27**, 3065–3086 (2007).
- 1160 98. Satyanarayana, T., Umbarger, H. E. & Lindegren, G. Biosynthesis of branched-chain amino acids in  
1161 yeast: regulation of leucine biosynthesis in prototrophic and leucine auxotrophic strains. *J. Bacteriol.*  
1162 **96**, 2018–2024 (1968).
- 1163 99. Lacroute, F. Regulation of pyrimidine biosynthesis in *Saccharomyces cerevisiae*. *J. Bacteriol.* **95**, 824–  
1164 832 (1968).
- 1165 100. Feller, A., Ramos, F., Pierard, A. & Dubois, E. In *Saccharomyces cerevisiae*, feedback inhibition of  
1166 homocitrate synthase isoenzymes by lysine modulates the activation of LYS gene expression by  
1167 Lys14p. *Eur. J. Biochem.* **261**, 163–170 (1999).
- 1168 101. Sutter, B. M., Wu, X., Laxman, S. & Tu, B. P. Methionine inhibits autophagy and promotes growth by  
1169 inducing the SAM-responsive methylation of PP2A. *Cell* **154**, 403–415 (2013).
- 1170 102. Walvekar, A. S., Srinivasan, R., Gupta, R. & Laxman, S. Methionine coordinates a hierarchically  
1171 organized anabolic program enabling proliferation. *Mol. Biol. Cell* **29**, 3183–3200 (2018).
- 1172 103. Spellman, P. T., Sherlock, G., Zhang, M. Q., Iyer, V. R., Anders, K., Eisen, M. B., Brown, P. O., Botstein,  
1173 D. & Futcher, B. Comprehensive identification of cell cycle-regulated genes of the yeast  
1174 *Saccharomyces cerevisiae* by microarray hybridization. *Mol. Biol. Cell* **9**, 3273–3297 (1998).
- 1175 104. Messenguy, F. & Dubois, E. Genetic evidence for a role for *MCM1* in the regulation of arginine  
1176 metabolism in *Saccharomyces cerevisiae*. *Mol. Cell. Biol.* **13**, 2586–2592 (1993).



- 1177 105. Maher, M., Cong, F., Kindelberger, D., Nasmyth, K. & Dalton, S. Cell cycle-regulated transcription of  
1178 the CLB2 gene is dependent on Mcm1 and a ternary complex factor. *Mol. Cell. Biol.* **15**, 3129–3137  
1179 (1995).
- 1180 106. Oehlen, L. J., McKinney, J. D. & Cross, F. R. Ste12 and Mcm1 regulate cell cycle-dependent  
1181 transcription of *FAR1*. *Mol. Cell. Biol.* **16**, 2830–2837 (1996).
- 1182 107. Pudasaini, A., El-Arab, K. K. & Zoltowski, B. D. LOV-based optogenetic devices: light-driven modules to  
1183 impart photoregulated control of cellular signaling. *Front. Mol. Biosci.* **2**, (2015).
- 1184 108. Zhao, E. M., Lalwani, M. A., Chen, J.-M., Orillac, P., Toettcher, J. E. & Avalos, J. L. Optogenetic  
1185 amplification circuits for light-induced metabolic control. *ACS Synth. Biol.* **10**, 1143–1154 (2021).
- 1186 109. Rivera-Cancel, G., Motta-Mena, L. B. & Gardner, K. H. Identification of natural and artificial DNA  
1187 substrates for light-activated LOV–HTH transcription factor EL222. *Biochemistry* **51**, 10024–10034  
1188 (2012).
- 1189 110. Morgan, D. O. *The cell cycle: Principles of control*. (Published by New Science Press in association with  
1190 Oxford University Press ; Distributed inside North America by Sinauer Associates, Publishers, 2007).
- 1191 111. Barik, D., Ball, D. A., Peccoud, J. & Tyson, J. J. A stochastic model of the yeast cell cycle reveals roles  
1192 for feedback regulation in limiting cellular variability. *PLOS Comput. Biol.* **12**, e1005230 (2016).
- 1193 112. Oikonomou, C. & Cross, F. R. Rising Cyclin-CDK Levels Order Cell Cycle Events. *PLoS ONE* **6**, e20788  
1194 (2011).
- 1195 113. Wäsch, R. & Cross, F. R. APC-dependent proteolysis of the mitotic cyclin Clb2 is essential for mitotic  
1196 exit. *Nature* **418**, 556–562 (2002).
- 1197 114. Rahi, S. J., Pecani, K., Ondracka, A., Oikonomou, C. & Cross, F. R. The CDK-APC/C oscillator  
1198 predominantly entrains periodic cell-cycle transcription. *Cell* **165**, 475–487 (2016).
- 1199 115. Drapkin, B. J., Lu, Y., Procko, A. L., Timney, B. L. & Cross, F. R. Analysis of the mitotic exit control  
1200 system using locked levels of stable mitotic cyclin. *Mol. Syst. Biol.* **5**, 328 (2009).
- 1201 116. Skotheim, J. M., Di Talia, S., Siggia, E. D. & Cross, F. R. Positive feedback of G1 cyclins ensures coherent  
1202 cell cycle entry. *Nature* **454**, 291–296 (2008).
- 1203 117. Garí, E., Piedrafita, L., Aldea, M. & Herrero, E. A set of vectors with a tetracycline-regulatable  
1204 promoter system for modulated gene expression in *Saccharomyces cerevisiae*. *Yeast Chichester Engl.*  
1205 **13**, 837–848 (1997).
- 1206 118. Azizoglu, A., Brent, R. & Rudolf, F. A precisely adjustable, variation-suppressed eukaryotic  
1207 transcriptional controller to enable genetic discovery. *eLife* **10**, e69549 (2021).
- 1208 119. Blomeier, T., Fischbach, P., Koch, L., Andres, J., Miñambres, M., Beyer, H. M. & Zurbriggen, M. D. Blue  
1209 Light-Operated CRISPR/Cas13b-Mediated mRNA Knockdown (Lockdown). *Adv. Biol.* **5**, 2000307  
1210 (2021).

- 1211 120. Jayaraman, P., Devarajan, K., Chua, T. K., Zhang, H., Gunawan, E. & Poh, C. L. Blue light-mediated  
1212 transcriptional activation and repression of gene expression in bacteria. *Nucleic Acids Res.* **44**, 6994–  
1213 7005 (2016).
- 1214 121. Ochoa-Fernandez, R., Abel, N. B., Wieland, F.-G., Schlegel, J., Koch, L.-A., Miller, J. B., Engesser, R.,  
1215 Giuriani, G., Brandl, S. M., Timmer, J., Weber, W., Ott, T., Simon, R. & Zurbriggen, M. D. Optogenetic  
1216 control of gene expression in plants in the presence of ambient white light. *Nat. Methods* **17**, 717–725  
1217 (2020).
- 1218 122. Daniel Gietz, R. & Woods, R. A. in *Methods Enzymol.* **350**, 87–96 (Elsevier, 2002).
- 1219 123. Miliadis-Argeitis, A., Summers, S., Stewart-Ornstein, J., Zuleta, I., Pincus, D., El-Samad, H., Khammash,  
1220 M. & Lygeros, J. *In silico* feedback for in vivo regulation of a gene expression circuit. *Nat. Biotechnol.*  
1221 **29**, 1114–1116 (2011).
- 1222 124. Silverman, B. W. *Density estimation for statistics and data analysis.* (Routledge, 2018).  
1223 doi:10.1201/9781315140919
- 1224 125. Allard, C. A. H., Decker, F., Weiner, O. D., Toettcher, J. E. & Graziano, B. R. A size-invariant bud-  
1225 duration timer enables robustness in yeast cell size control. *PLOS ONE* **13**, e0209301 (2018).
- 1226 126. Synthetic complete (SC) medium. *Cold Spring Harb. Protoc.* **2016**, pdb.rec090589 (2016).
- 1227 127. Natarajan, A., Subramanian, S. & Srienc, F. Comparison of mutant forms of the green fluorescent  
1228 protein as expression markers in Chinese hamster ovary (CHO) and *Saccharomyces cerevisiae* cells. *J.*  
1229 *Biotechnol.* **62**, 29–45 (1998).

1230

1231

1232

1233

1234

1235

1236

1237

1238

1239

1240

1241

1242

1243

1244

1245

1246 **Supplementary Information**

1247 **Supplementary Figure 1.**

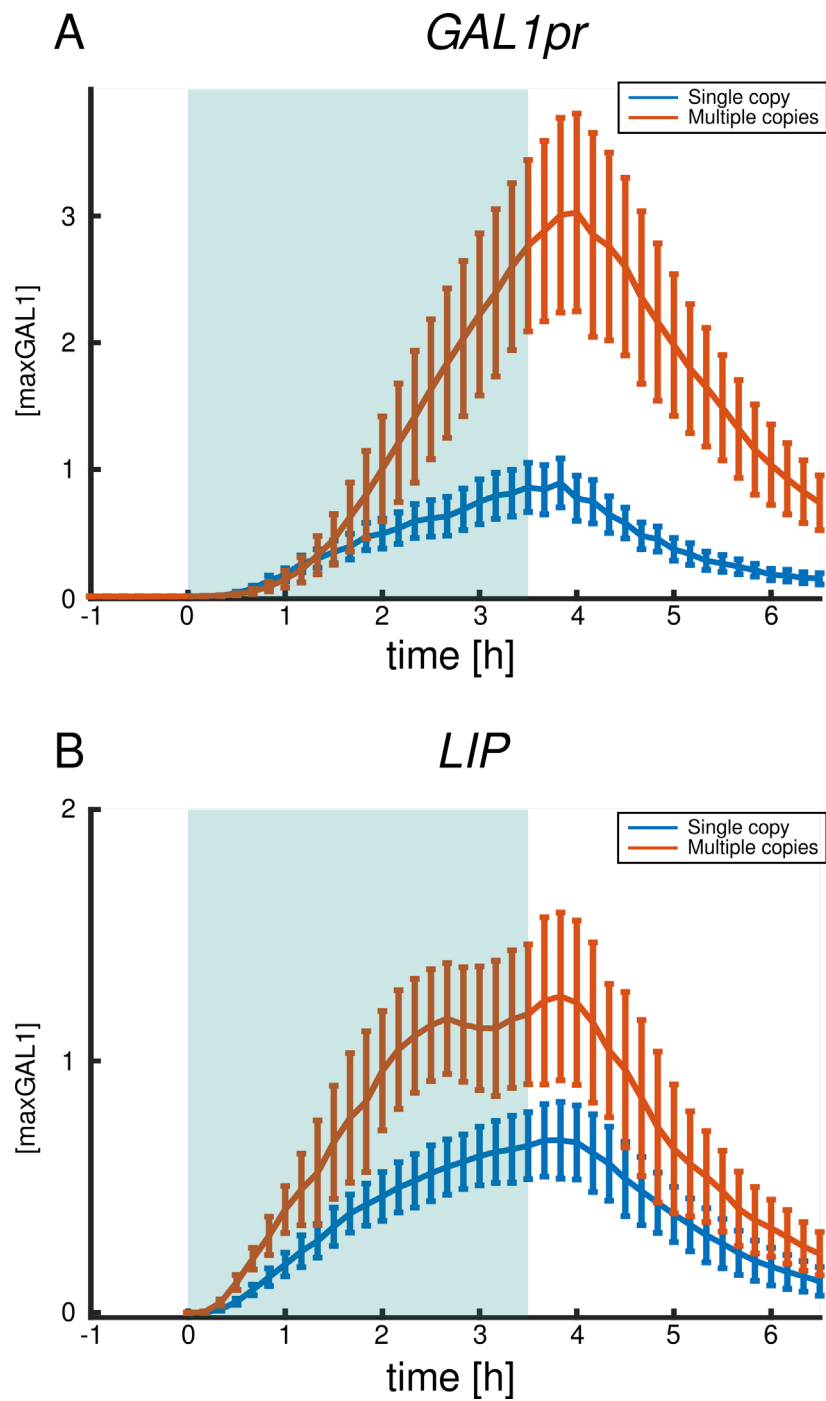

1248

1249 Supplementary Figure 1. The number of copies of the reporter construct influences the observed activity level,  
1250 rendering data from different sources with unknown reporter copy numbers not comparable. A: *GAL1pr-yEVENUS*  
1251 construct integrated as single (blue) or multiple copies (red) at the *URA3* locus. B: Similarly for *El222-LIP*. A, B:  
1252 Time courses of the inducible system activity during dynamic perturbation. The blue background represents the  
1253 induction period. Vertical error bars indicate the standard deviation around each timepoint.

1254

1255 Supplementary Figure 2

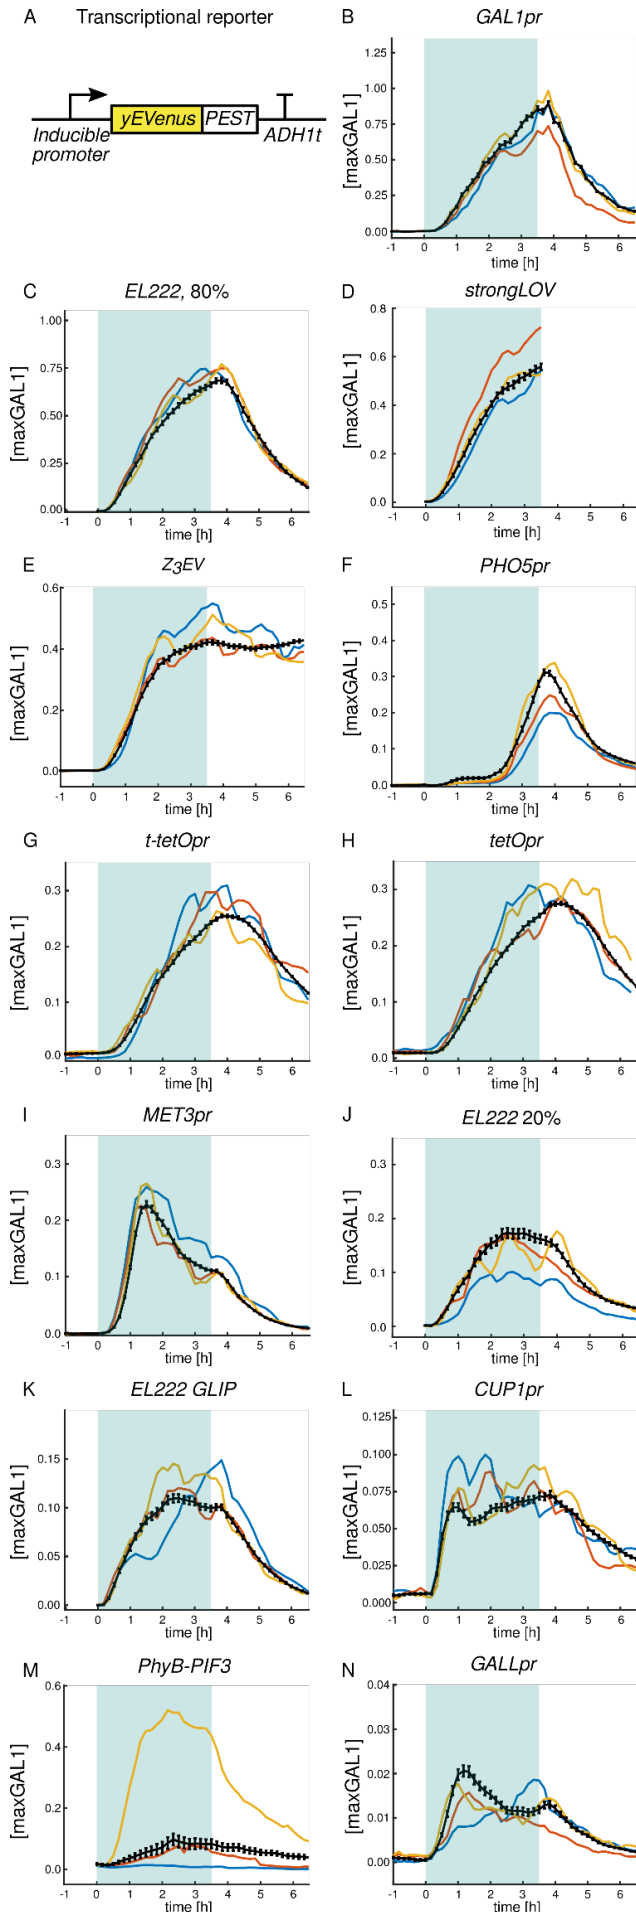

Supplementary Figure 2. On and off dynamics of inducible systems with standard error of the mean (SEM) shown (instead of the standard deviation as in Fig. 2). The small SEMs show that the mean activity has been determined with high confidence based on the number of cells analyzed. A: The reporter for transcriptional activity consists of an inducible promoter and the fast-folding yellow fluorescent protein *yEVENUS* gene fused to a constitutive degron (*PEST*) and the *ADHI1* terminator. B-J: Time courses of activation and deactivation for different inducible systems sorted in descending order by peak strength. Induction starts at  $t = 0$  h and finishes at  $t = 3.5$  h. The blue background represents the induction period. Promoter activity is given in maxGAL1 units. Black lines show the average of the mean cellular expression and standard error of the mean. Colored lines show different representative single-cell time courses. For the light-inducible systems, fluorescence was not measured prior to induction in order to avoid possible activation by the light source used for fluorescent protein excitation. *EL222 20%*, *EL222 80%*, *strongLOV*, and *GLIP* are defined in the caption of Fig. 2. Due to the high sensitivity of strongLOV to the light used for fluorescent protein activation, microscopy measurement of the off dynamics was not possible; for turn-off experiments in bulk culture see Fig. 13.

1257 Supplementary Figure 3

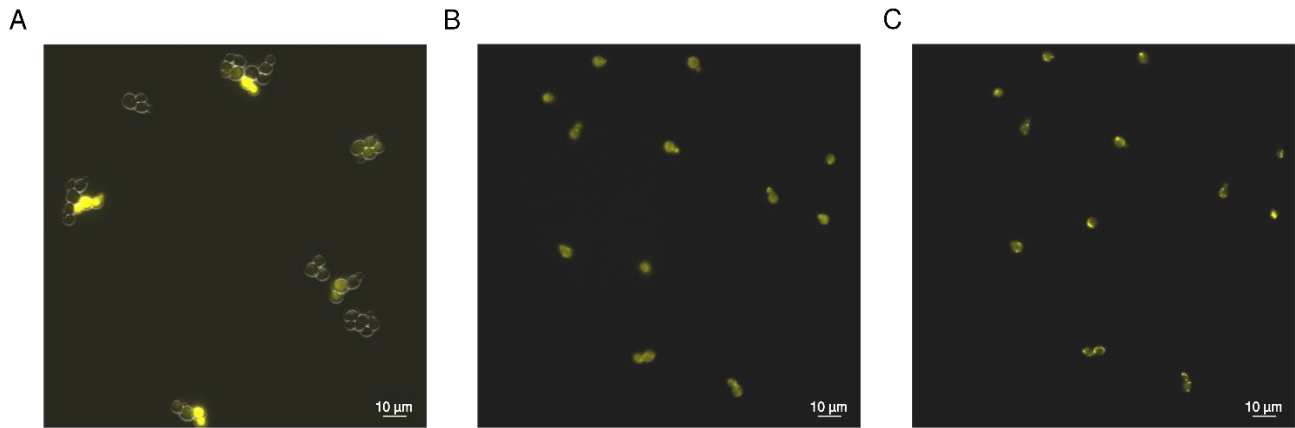

1258

1259 Supplementary Figure 3. The PhyB-PIF3 system for transcriptional control of *GAL1pr* shows higher cell-to-cell  
1260 variability in response to red light compared to the PhyB-PIF3 system used for subcellular relocalization. A: The  
1261 PhyB-PIF3 system for transcriptional control. B, C: Using the same experimental setup, we measured the  
1262 responsiveness of the PhyB-PIF3 system used for inducing mitochondrial localization of a yellow fluorescent protein.  
1263 B: After incubation with PCB, cells with *PhyB-mCherry-Tom7* and *Bem1-mCitrine-PIF3*<sup>25</sup> constructs were  
1264 illuminated with far-red light for 30 s (diodes with 740 nm emission peak), and a snapshot of the off state was taken  
1265 30 s later. These cells show the off state of the system, where Bem1-mCitrine is allowed to assume its diffuse  
1266 localization. C: Cells with the PhyB-PIF3-based mitochondrial tethering construct responded uniformly to red light  
1267 by changing the location of Bem1-mCitrine-PIF3. Induction was performed by illuminating the cells with red light  
1268 (650 nm emission peak) for 30 s and imaging after 1 min from the start of the induction to allow for localization  
1269 (same cells shown as in panel B with the same normalization of the pixel intensity). Given the high reliability of the  
1270 system shown in panels B and C, these experiments suggest that the stochasticity of the transcriptional PhyB-PIF3  
1271 system does not come from noise in the PhyB-PIF3 interaction.

1272

1273 Supplementary Figure 4

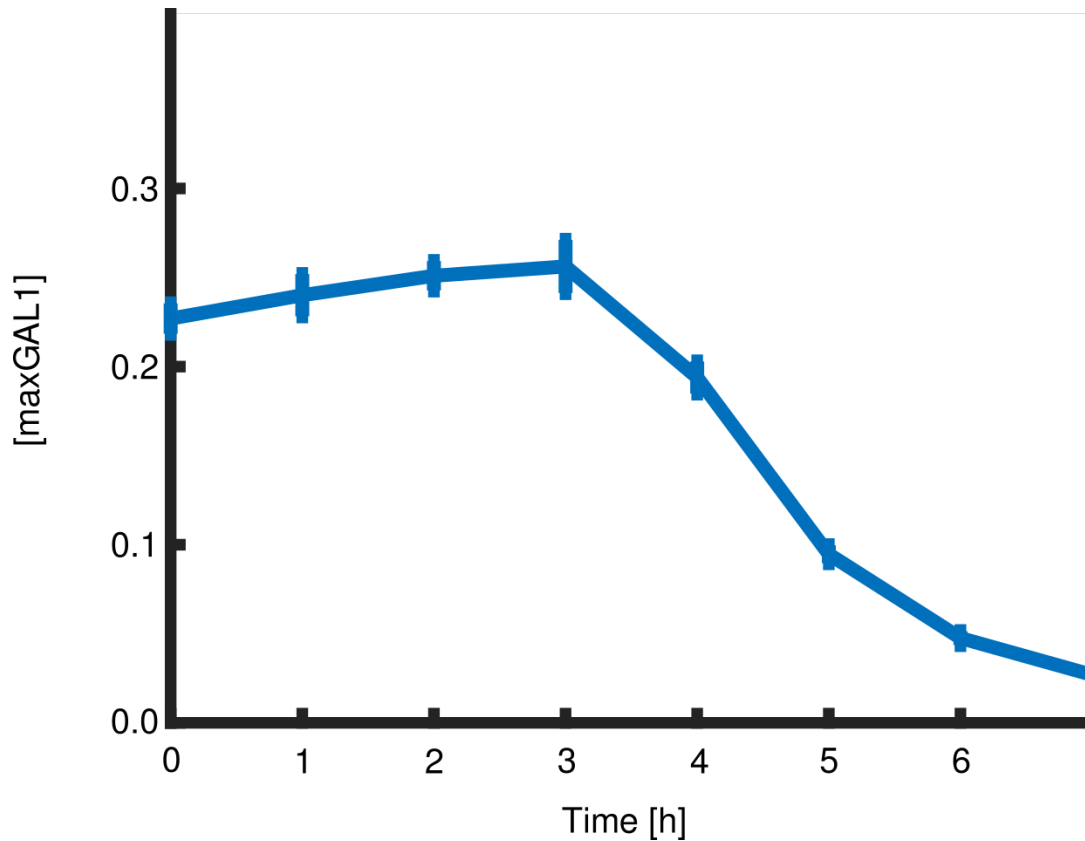

1274

1275 Supplementary Figure 4. Expression under the control of Z<sub>3</sub>EV remains on for hours after estradiol is depleted from  
1276 the media. The experiment was performed in liquid culture by transferring cells carrying *yE<sub>Venus</sub>-PEST* expressed  
1277 by the Z<sub>3</sub>EV system induced with 0.5 μM estradiol to non-inducing media at t = 0. Vertical bars indicate the standard  
1278 error of the mean (SEM). To make sure that no residual estradiol was carried to the off-state medium, we washed the  
1279 cells 3 times by centrifugation and resuspension. The concentration of the inducer that we used before these washes  
1280 was half of what is used in most of the experiments in the publication<sup>19</sup> where the system was first presented.

1281

1282 Supplementary Figure 5

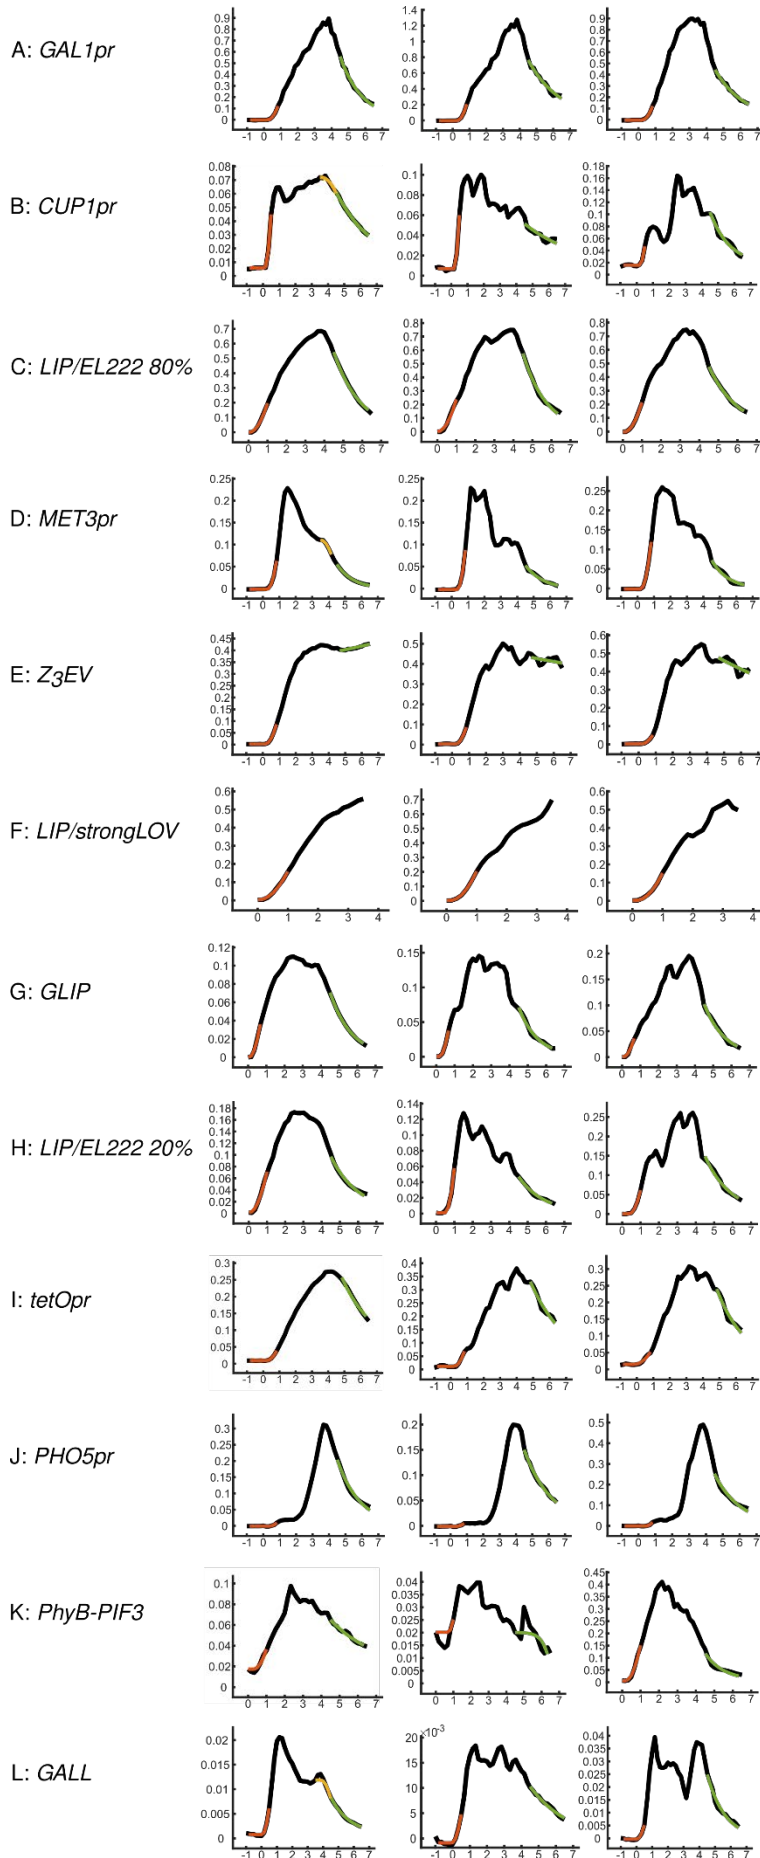

Supplementary Figure 5. Single-cell fits. A-L: The first column shows the fits to the curve averaged across the population of the cells while the next two columns show examples of fits to single-cell time courses. The black curve represents the measured data; the orange curve denotes the fit to the initial part of the dynamics from which  $b$ ,  $\tau_{on}$ , and  $i$  are extracted; the green curve represents the fit to the part of the time course from which the degradation-and-dilution rates ( $d$ ) are extracted. In the cases where the turn-off delay was estimated from the average time-course data (*CUP1pr*, *MET3pr*, *PHO5pr*, and *GALL*), the yellow curve shows the fit from which  $t_{off}$  is extracted. The y-axis on all plots is in maxGAL1 units, while the x-axis is in hours.



1283 Supplementary Figure 6

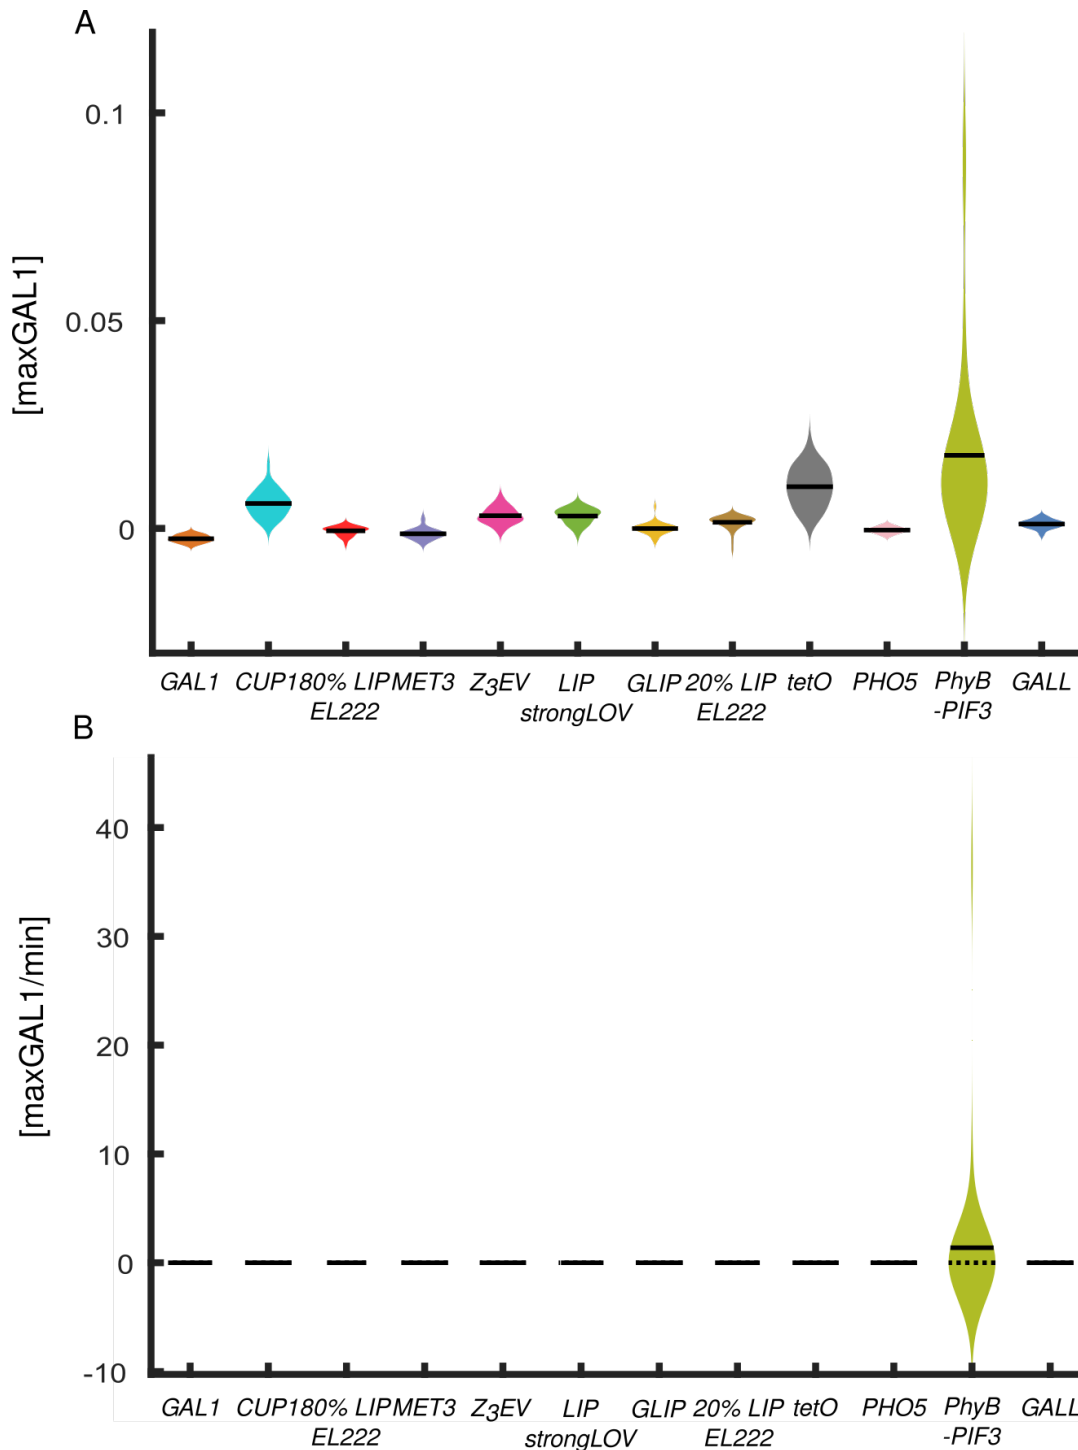

1284

1285 Supplementary Figure 6. Single-cell characteristics of the inducible systems, shown with the whole population of  
1286 *PhyB-PIF3* cells, including the outlier cells that were excluded in Fig. 5. A: Basal fluorescence (compare with panel  
1287 E in Fig. 5). B: Basal level parameter (b) (compare with panel F in Fig. 5). Few ( $n = 3$ ) out of 33 cells with the *PhyB-*  
1288 *PIF3* system have leakiness much higher than the mean of the population. This results in the higher estimated  
1289 bandwidth used for plotting violin plots and obstructs the comparison between the systems, hence we excluded them  
1290 from the main plot in Fig. 5 but show them here.

1291

1292 Supplementary Figure 7

A: *GAL1pr*

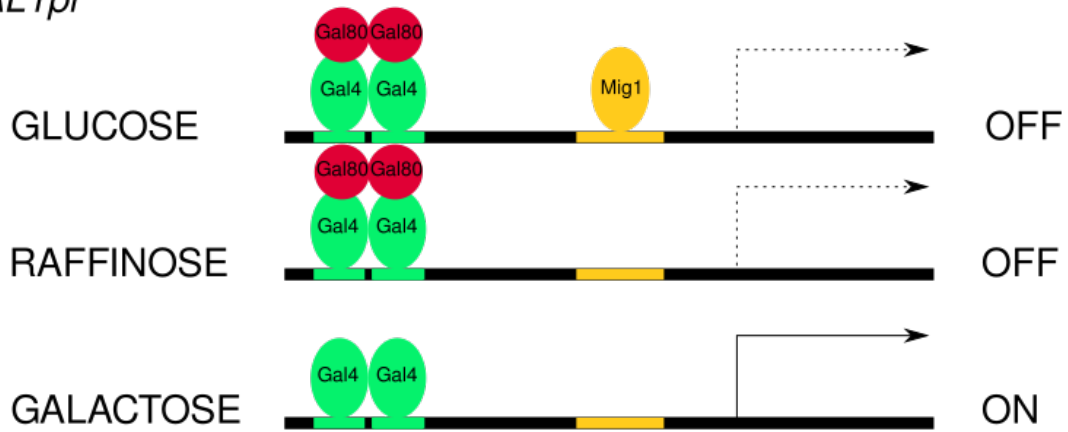

B: *GALLpr*

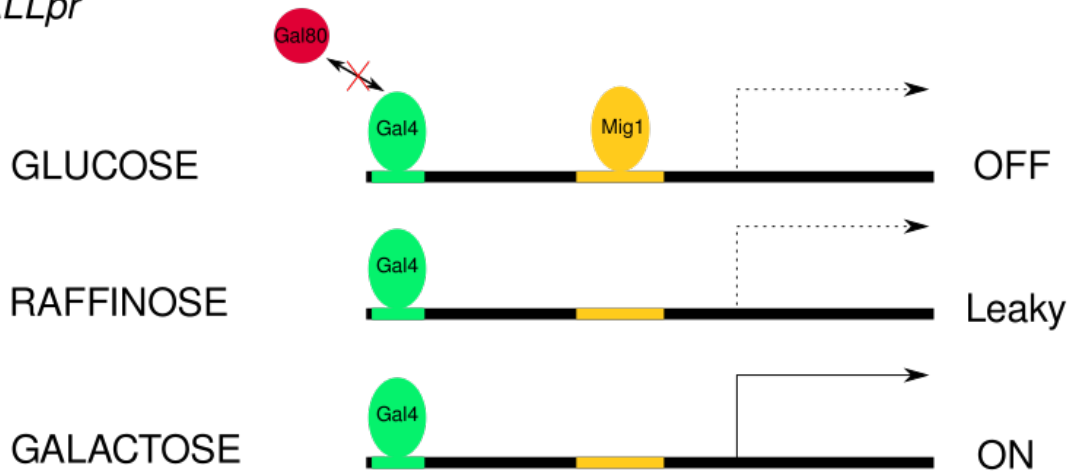

C: *GLIP*

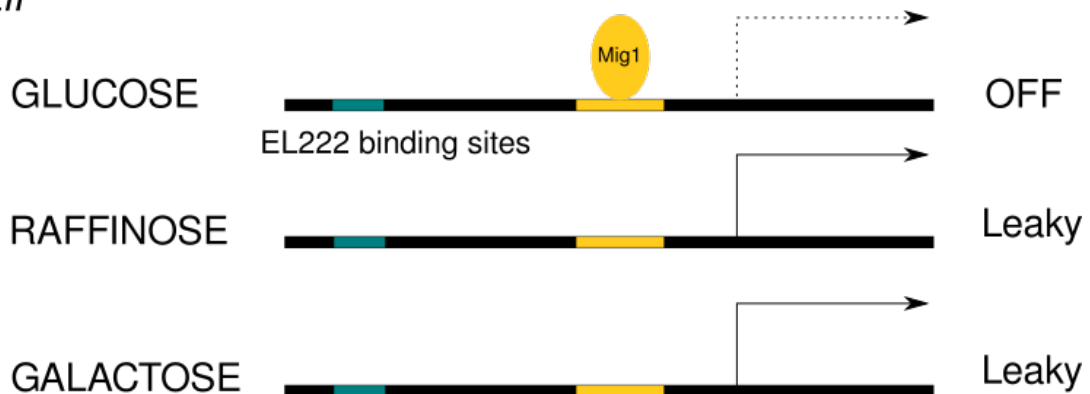

1293

1294 Supplementary Figure 7. A simple molecular model based on past findings explains the leakiness of *GAL1pr*, *GALL*,  
 1295 and *GLIP* in different carbon sources. A: In glucose, *GAL1pr* is repressed by Mig1 and the Gal80 homodimer<sup>38</sup>. In  
 1296 raffinose, *GAL1pr* is only repressed by the Gal80 homodimer<sup>80</sup>. Repression by Gal80 alone is strong enough to  
 1297 suppress leakiness below the detection limit of our transcriptional reporter without the *PEST* sequence. B: Once the  
 1298 repression of *GALL* by Mig1 is relieved in *raffinose*, it exhibits substantially higher leakiness compared to *GAL1pr*,  
 1299 presumably due to the less efficient binding of the Gal80 homodimer to the Gal4 monomer, as demonstrated  
 1300 previously<sup>82</sup>. C: The *GAL1pr*-based light-inducible promoter (*GLIP*) inherited its Mig1 binding sites from *GAL1pr*,  
 1301 which is reflected in low *GLIP* leakiness in glucose media. Inactivation of Mig1 in raffinose or galactose leads to the  
 1302 same level of leaky transcription presumably due to basal activity of the system.

1303 Supplementary Figure 8

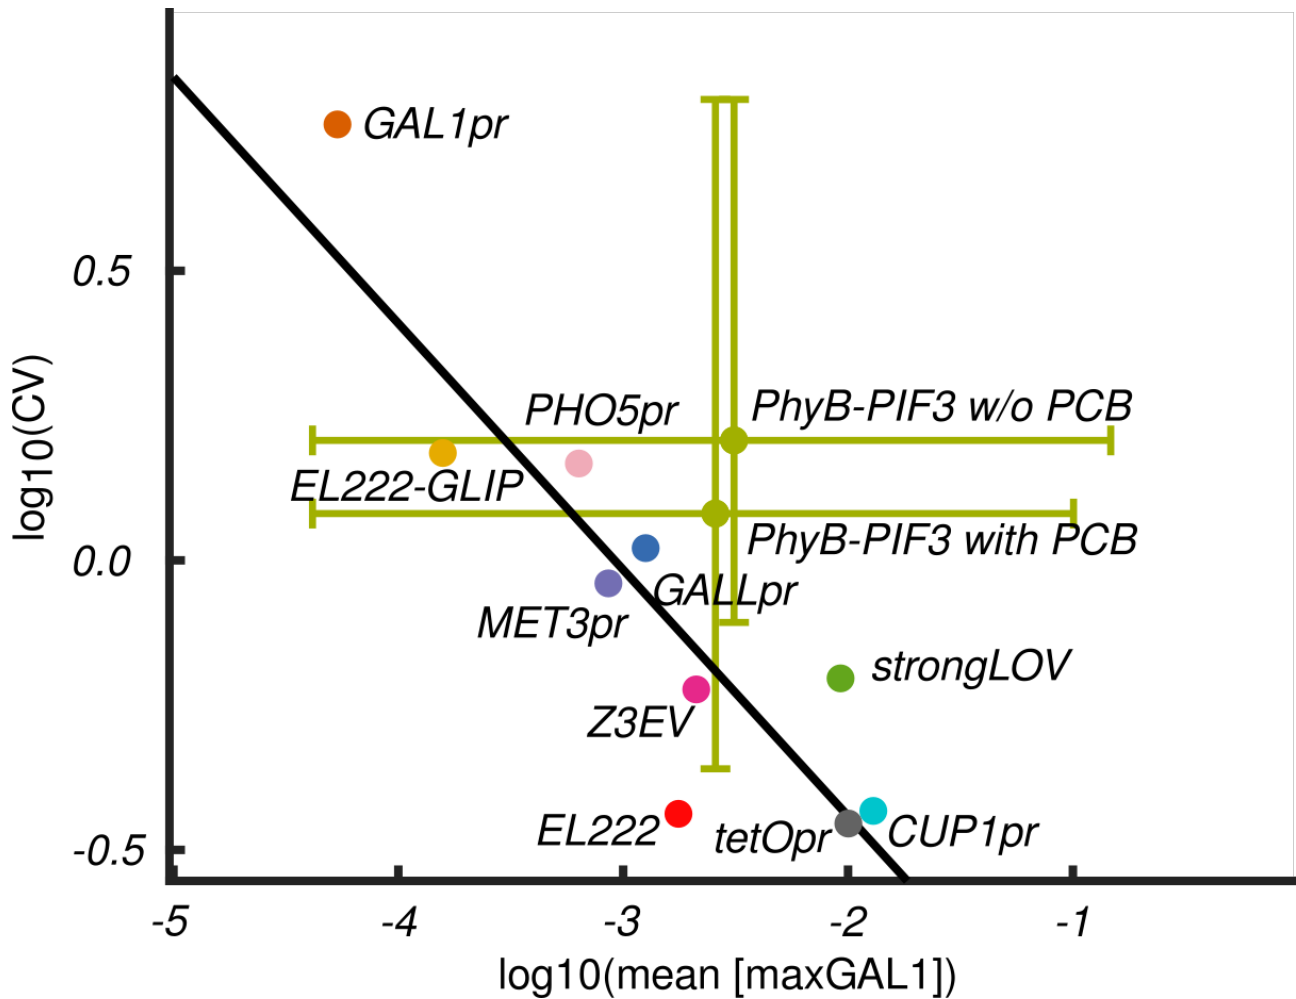

1312 Supplementary Figure 9

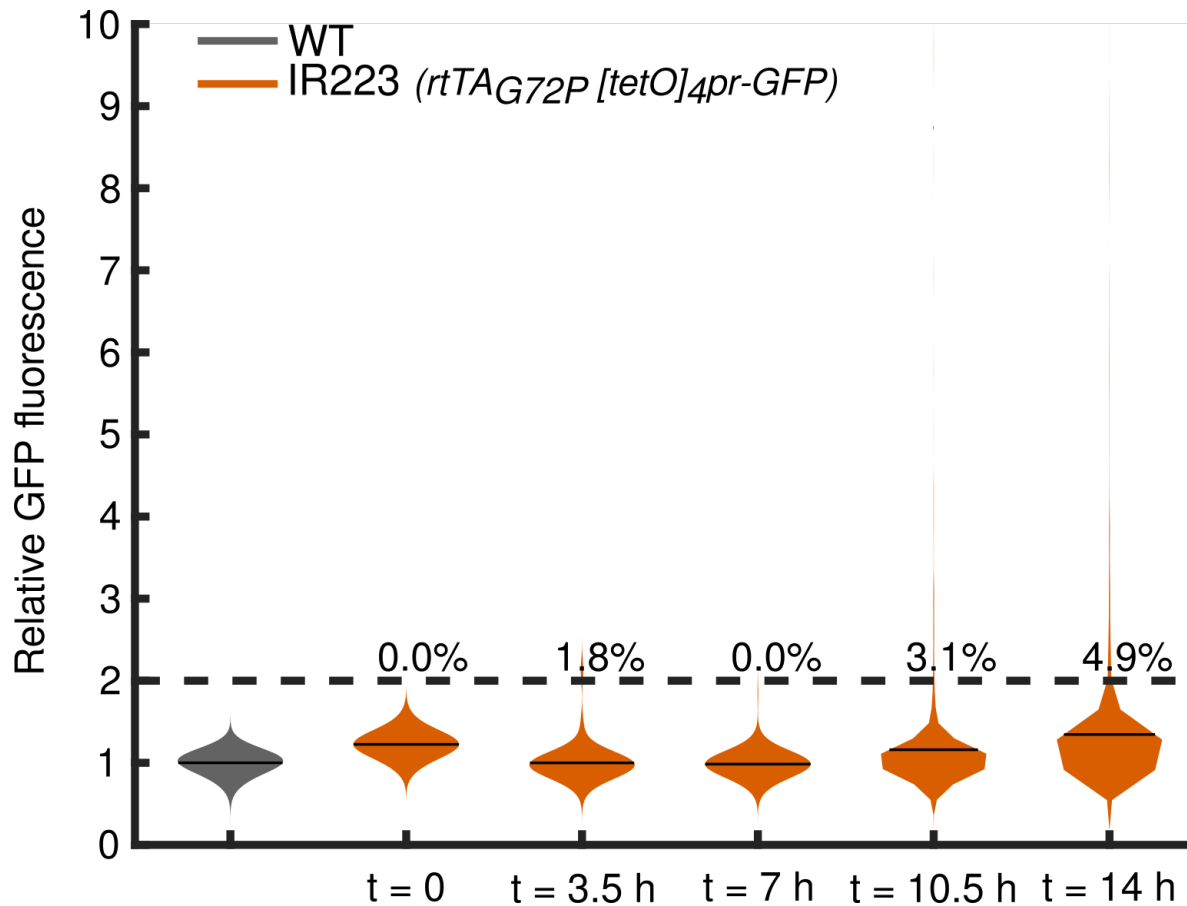

1313

1314 Supplementary Figure 9. The IR223 strain containing the least leaky Tet-On system in ref. <sup>83</sup> was tested for induction  
1315 for 14 hrs. We used the concentration of doxycycline tested in ref. <sup>83</sup> (100 mg/L doxycycline, a concentration 22.5x  
1316 higher than the one used for the induction of the non-mutated Tet-On system). Values of GFP fluorescence are  
1317 scaled relative to WT autofluorescence. Percentages indicate the fraction of cells that have fluorescence levels above  
1318 200% of WT autofluorescence (dashed line).

1319

1320 Supplementary Figure 10

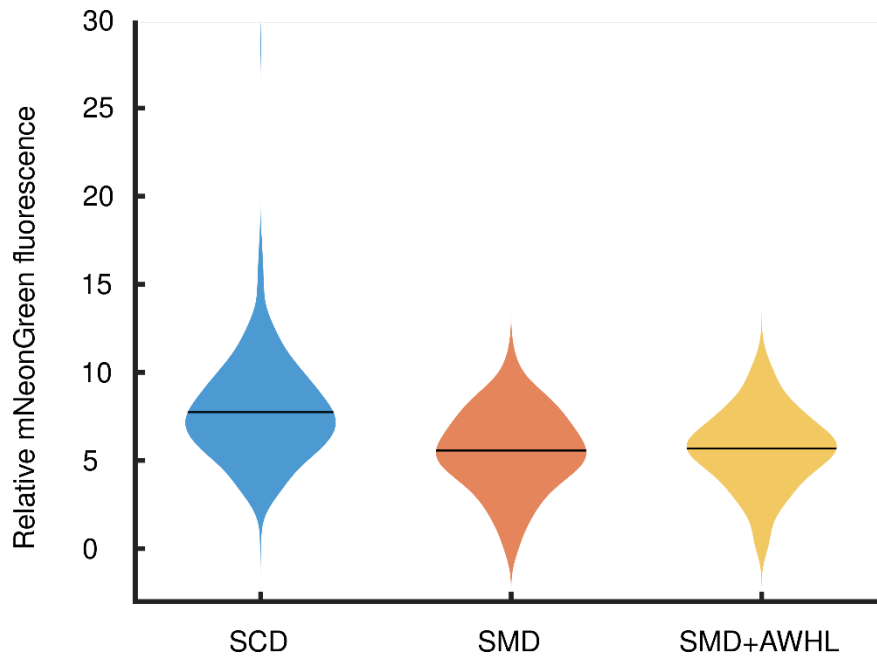

1321

1322 Supplementary Figure 10. Expression of *ARG3pr-ARG3-mNeonGreen* measured in synthetic complete and in  
1323 synthetic minimal media. SCM - Synthetic complete media; SMM – Synthetic minimal media; SMM+AWHL –  
1324 Synthetic minimal media with adenine, tryptophan, histidine and leucine, for which the tested strain was  
1325 auxotrophic. Fluorescence values are relative to wild-type autofluorescence in the green channel. Numbers of  
1326 analyzed cells are given in Supplementary Table 17. Black horizontal bars indicate the mean.

1327

1328 Supplementary Figure 11

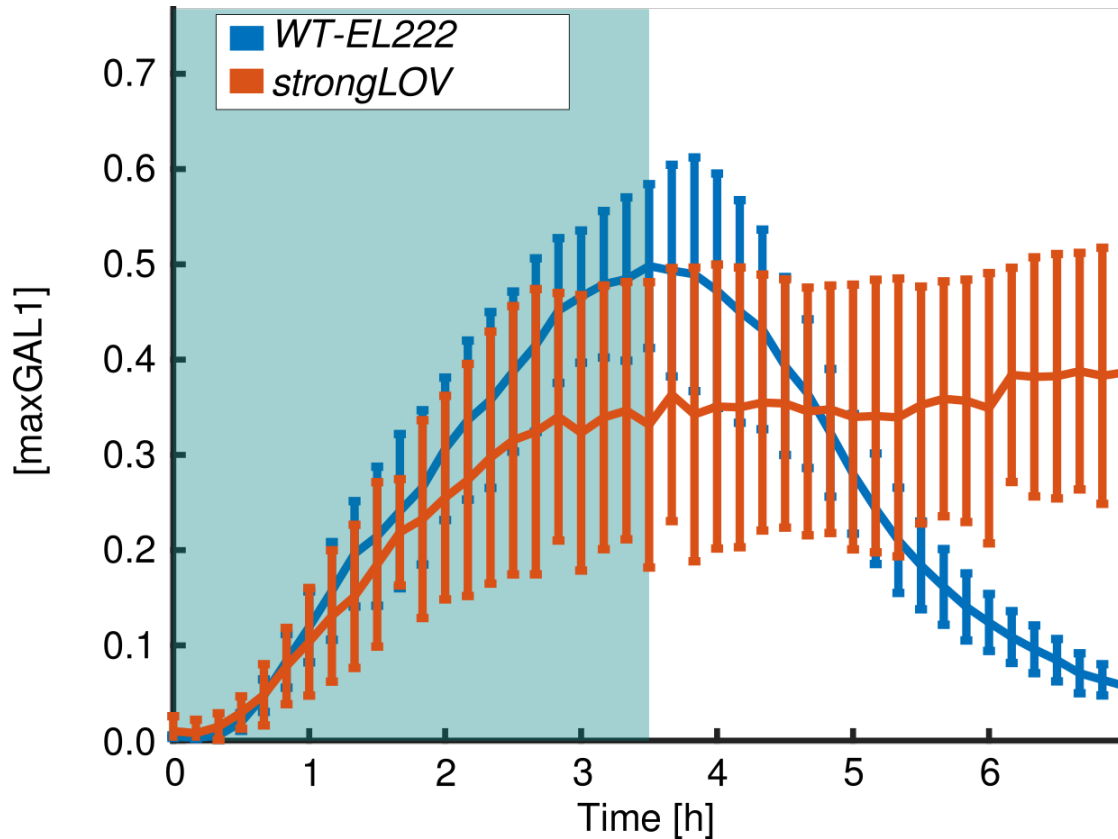

1329

1330 Supplementary Figure 11. Comparison of wild-type El222 and strongLOV (El222 Glu84Asp) under induction with  
1331 80% of the maximal light intensity. Unlike for WT El222, we did not observe the decline in strongLOV after turning  
1332 off the diasopic illumination used for induction at  $t = 3.5$  h. This could either be due to the long-lasting active state  
1333 of strongLOV or due to high sensitivity of strongLOV to the light used for exciting the *LIP-yEVENUS-PEST* reporter,  
1334 which partly overlaps with the El222 activation spectrum. To differentiate these possibilities, we performed  
1335 experiments in liquid culture shown in Fig. 13 B in which we turned off the blue light source for inducing  
1336 strongLOV-*LIP* and monitored the dynamics of the fluorescent reporter by sampling the population of cells, which  
1337 were kept in the dark, at various times. We found that when kept in absolute darkness, the strongLOV system  
1338 switched off with the same kinetics as El222 (Fig. 13 B). Blue background denotes the presence of light. Vertical bars  
1339 denote the standard deviation.

1340 Supplementary Table 1: Plasmids used in the study

| Plasmid | Backbone            | Insert                                                                          | Restriction enzymes used for cloning | Bacterial selection marker | Source            |
|---------|---------------------|---------------------------------------------------------------------------------|--------------------------------------|----------------------------|-------------------|
| pVG9    | pCL10               | <i>pC120 – yEVENus – CLN2 PEST – ADH1t</i>                                      | <i>PacI</i> and <i>BamHI</i>         | AmpR                       | <i>This study</i> |
| pVG10   | pCL10               | <i>GALL – yEVENus – CLN2 PEST – ADH1t</i>                                       | <i>PacI</i> and <i>BamHI</i>         | AmpR                       | <i>This study</i> |
| pVG11   | pCL10               | <i>[GAL1pr-pC120-GAL1pr] – yEVENus – CLN2 PEST – ADH1t</i>                      | <i>PacI</i> and <i>BamHI</i>         | AmpR                       | <i>This study</i> |
| pVG45   | pCL10               | <i>CUP1pr – yEVENus – CLN2 PEST – ADH1t</i>                                     | <i>PacI</i> and <i>BamHI</i>         | AmpR                       | <i>This study</i> |
| pVG46   | pCL10               | <i>PHO5pr – yEVENus – CLN2 PEST – ADH1t</i>                                     | <i>BsWI</i> and <i>BamHI</i>         | AmpR                       | <i>This study</i> |
| pVG47   | pCL10               | <i>tetOpr – yEVENus – CLN2 PEST – ADH1t</i>                                     | <i>PacI</i> and <i>BamHI</i>         | AmpR                       | <i>This study</i> |
| pVG48   | EZL105 <sup>6</sup> | <i>PGK1pr – rtTA – CYC1t</i>                                                    | <i>NheI</i> and <i>XhoI</i>          | AmpR                       | <i>This study</i> |
| pVG49   | pCL10               | <i>GAL1pr – yEVENus – CLN2 PEST – ADH1t</i>                                     | <i>PacI</i> and <i>BamHI</i>         | AmpR                       | <i>This study</i> |
| pVG50   | pCL10               | <i>ADH1t – tetOpr – yEVENus – CLN2 PEST – ADH1t</i>                             | <i>PacI</i> and <i>BamHI</i>         | AmpR                       | <i>This study</i> |
| pVG88   | pCL10               | <i>ARG3pr – yEVENus – CLN2 PEST – ADH1t</i>                                     | <i>PacI</i> and <i>BamHI</i>         | AmpR                       | <i>This study</i> |
| EZL105  | -                   | <i>PGK1pr – EL222 – CYC1t</i>                                                   | -                                    | AmpR                       | <sup>6</sup>      |
| pVG52   | pVG35 (unpublished) | <i>pC120 – CLB2kd – yEVENus – ADH1t</i>                                         | <i>XbaI</i> and <i>SapI</i>          | AmpR                       | <i>This study</i> |
| pVG97   | pVG94 (unpublished) | <i>yEVENus – STOP – URA3 5'UTR</i>                                              | <i>KpnI</i>                          | AmpR                       | <i>This study</i> |
| pVG106  | pVG48               | <i>PGK1pr – Z3EV – CYC1t</i>                                                    | <i>NheI</i> and <i>XhoI</i>          | AmpR                       | <i>This study</i> |
| pVG107  | pCL10               | <i>Z3EVpr – yEVENus – CLN2 PEST – ADH1t</i>                                     | <i>BamHI</i> and <i>PacI</i>         | AmpR                       | <i>This study</i> |
| pVG108  | pRD14 (unpublished) | <i>ADH1pr – PhyB – GAL4BD – ADH1t</i> and <i>ADH1pr – PIF3 – GAL4AD – ADH1t</i> | <i>DraIII</i> and <i>AflII</i>       | AmpR                       | <i>This study</i> |
| pVG109  | pCL10               | <i>MET3pr – yEVENus – CLN2 PEST – ADH1t</i> for integration in chromosome I     | <i>KpnI</i>                          | AmpR                       | <i>This study</i> |
| pVG122  | EZL105 <sup>6</sup> | <i>PGK1pr – EL222 (Glu84Asp) – CYC1t</i>                                        | <i>EcoRI</i> and <i>XhoI</i>         | AmpR                       | <i>This study</i> |
| pCL10   | -                   | <i>MET3pr – yEVENus – CLN2 PEST – ADH1t</i>                                     | -                                    | AmpR                       | <i>LPBS</i>       |

1342 Supplementary Table 2: Yeast strains used in the study

| Strain                  | Mating type<br>(N.D. = not determined) | Genotype                                                                                                                                          |
|-------------------------|----------------------------------------|---------------------------------------------------------------------------------------------------------------------------------------------------|
| yVG408 (met3.3)         | <i>a</i>                               | <i>ura3-1::MET3pr – yEVENUS – CLN2 PEST – ADH1t::URA3</i><br>(single copy)                                                                        |
| yVG597<br>(cup1.22-sc2) | <i>a</i>                               | <i>ura3-1::CUP1pr – yEVENUS – CLN2 PEST – ADH1t::URA3</i><br>(single copy)                                                                        |
| yVG301 (gal1.17)        | <i>a</i>                               | <i>ura3-1::GAL1pr – yEVENUS – CLN2 PEST – ADH1t::URA3</i><br>(single copy)                                                                        |
| yVG302 (gal1.15)        | <i>a</i>                               | <i>ura3-1::GALL – yEVENUS – CLN2 PEST – ADH1t::URA3</i><br>(single copy)                                                                          |
| yVG303<br>(lip27)       | N.D.                                   | <i>ura3-1::pC120 – yEVENUS – CLN2 PEST – ADH1t::URA3</i><br>(single copy)<br><i>PGK1pr::PGK1pr – EL222 – CYC1t::HIS3</i>                          |
| yVG297 (hame7)          | N.D.                                   | <i>ura3-1::[GAL1-pCL120-GAL1] – yEVENUS – CLN2 PEST – ADH1t::URA3</i> (single copy)<br><i>PGK1pr::PGK1pr – EL222 – CYC1t::HIS3</i>                |
| yVG300 (tetO10)         | N.D.                                   | <i>ura3-1::tetO – yEVENUS – CLN2 PEST – ADH1t::URA3</i><br>(single copy)<br><i>PGK1pr::PGK1pr – rtTA – CYC1t::HIS3</i>                            |
| yVG305 (1cV11)          | N.D.                                   | <i>ura3-1::ADH1t – tetO – yEVENUS – CLN2 PEST – ADH1t::URA3</i> (single copy)<br><i>PGK1pr::PGK1pr – rtTA – CYC1t::HIS3</i>                       |
| yVG411 (pho1.3)         | <i>a</i>                               | <i>ura3-1::PHO5pr – yEVENUS – CLN2 PEST – ADH1t::URA3</i><br>(single copy)                                                                        |
| yVG1703                 | <i>a</i>                               | <i>ura3-1::GAL1pr – yEVENUS – CLN2 PEST – ADH1t::URA3</i><br>(single copy)<br><i>ADH1pr – PhyB – ADH1t::ADH1pr – PIF3 – ADH1t::NatMX</i>          |
| yVG1648                 | N.D.                                   | <i>ura3-1::pC120 – yEVENUS – CLN2 PEST – ADH1t::URA3</i><br>(single copy)<br><i>PGK1pr::PGK1pr – EL222 – CYC1t::HIS3</i> (single copy)            |
| yVG1654                 | N.D.                                   | <i>ura3-1::pC120 – yEVENUS – CLN2 PEST – ADH1t::URA3</i><br>(single copy)<br><i>PGK1pr::PGK1pr – EL222 (Glu84Asp) – CYC1t::HIS3</i> (single copy) |
| yVG1279 (es1)           | N.D.                                   | <i>ura3-1::Z3EVpr – yEVENUS – CLN2 PEST – ADH1t::URA3</i><br>(single copy)<br><i>PGK1pr::PGK1pr – Z3EV – CYC1t::HIS3</i>                          |
| yVG649<br>(97gal1-1)    | N.D.                                   | <i>ura3-1::GALL – yEVENUS – ADH1t::KanMX</i> (single copy)                                                                                        |
| yVG651<br>(97met-9)     | N.D.                                   | <i>ura3-1::MET3pr – yEVENUS – ADH1t::KanMX</i> (single copy)                                                                                      |
| yVG652<br>(97cup-14)    | N.D.                                   | <i>ura3-1::CUP1pr – yEVENUS – ADH1t::KanMX</i> (single copy)                                                                                      |



|                       |          |                                                                                                                                                                                          |
|-----------------------|----------|------------------------------------------------------------------------------------------------------------------------------------------------------------------------------------------|
| yVG654<br>(97teto-22) | N.D.     | <i>ura3-1::tetO – yEVENUS – ADH1t::KanMX</i> (single copy)<br><i>PGK1pr – rtTA – CYC1t::HIS3</i>                                                                                         |
| yVG656<br>(97pho-30)  | N.D.     | <i>ura3-1::PHO5pr – yEVENUS – ADH1t::KanMX</i> (single copy)                                                                                                                             |
| yVG658<br>(97lip-38)  | N.D.     | <i>ura3-1::pC120 – yEVENUS – ADH1t::KanMX</i> (single copy)<br><i>PGK1pr – EL222 – CYC1t::HIS3</i>                                                                                       |
| yVG663<br>(97glip-47) | N.D.     | <i>ura3-1::[GAL1-pCL120-GAL1] – yEVENUS – ADH1t::KanMX</i><br>(single copy)<br><i>PGK1pr::PGK1pr – EL222 – CYC1t::HIS3</i>                                                               |
| yVG664<br>(97gal1-27) | N.D.     | <i>ura3-1::GAL1pr – yEVENUS – ADH1t::KanMX</i><br>(single copy)                                                                                                                          |
| yVG1706               | N.D.     | <i>ura3-1::GAL1pr – yEVENUS – ADH1t::KanMX</i><br>(single copy)<br><i>ADH1pr – PhyB – ADH1t::ADH1pr – PIF3 –</i><br><i>ADH1t::NatMX</i>                                                  |
| yVG1637               | N.D.     | <i>ura3-1::pC120 – yEVENUS – ADH1t::KanMX</i> (single copy)<br><i>PGK1pr::PGK1pr – EL222 – CYC1t::HIS3</i> (single copy)                                                                 |
| yVG1643               | N.D.     | <i>ura3-1::pC120 – yEVENUS – ADH1t::KanMX</i> (single copy)<br><i>PGK1pr::PGK1pr – EL222 (Glu84Asp) – CYC1t::HIS3</i> (single<br>copy)                                                   |
| yVG1282 (pes1)        | N.D.     | <i>ura3-1::Z3EVpr – yEVENUS – ADH1t::KanMX</i> (single copy)<br><i>PGK1pr::PGK1pr – Z3EV – CYC1t::HIS3</i>                                                                               |
| yVG540<br>(arg3-12)   | <i>a</i> | <i>ura3-1::ARG3pr – yEVENUS – CLN2 PEST – ADH1t::URA3</i><br>(single copy)                                                                                                               |
| yVG1627               | N.D.     | <i>met17</i><br><i>ura3-1::MET3pr – yEVENUS – CLN2 PEST – ADH1t::URA3</i><br>(single copy)                                                                                               |
| yVG539<br>(50cV29)    | N.D.     | <i>cln1,3 cln2::MET3pr-CLN2</i><br><i>clb1 clb2::GALL – CLB2::URA3</i><br><i>HTB2::HTB2-mCherry::HIS3</i>                                                                                |
| yVG338                | N.D.     | <i>cln1,3 cln2::MET3pr-CLN2</i><br><i>clb1 clb2::GALL – CLB2::URA3</i><br><i>HTB2::HTB2-mCherry::HIS3</i><br><i>PGK1pr::PGK1pr – EL222 – CYC1t::LIP-CLB2kd-</i><br><i>yEVENUS::NatMX</i> |
| yVG284 (1dV35)        | N.D.     | <i>cln1 cln2::TRP1 trp1-1::MET3pr-CLN2::TRP1 cln3::LEU2</i><br><i>CLB2::CLB2-YFP::HIS3</i><br><i>HTB2::HTB2-mCherry::HIS3</i>                                                            |

1344 Supplementary Tables 3-12. p-values for significance of the differences between all pairs of  
 1345 measurements described in the main text. Red background denotes  $p < 0.05$ . In cases where the  
 1346 t-score or z-score, based on which the p values were calculated, was bigger than 50, we  
 1347 approximated the Student distribution by a standard  $N(0,1)$  distribution. The number of degrees  
 1348 of freedom in these cases was always bigger than 30.

1349

|           | GAL1     | CUP1     | LIP_80p  | MET3     | Z3EV     | stron... | GLIP     | LIP_20p  | tetO     | PHO5     | PhyB     | GALL |
|-----------|----------|----------|----------|----------|----------|----------|----------|----------|----------|----------|----------|------|
| GAL1      |          |          |          |          |          |          |          |          |          |          |          |      |
| CUP1      | 5.56e-02 |          |          |          |          |          |          |          |          |          |          |      |
| LIP_80p   | 4.63e-05 | 2.34e-03 |          |          |          |          |          |          |          |          |          |      |
| MET3      | 4.28e-05 | 2.73e-03 | 8.78e-01 |          |          |          |          |          |          |          |          |      |
| Z3EV      | 1.19e-05 | 3.35e-04 | 2.22e-01 | 3.75e-01 |          |          |          |          |          |          |          |      |
| strongLOV | 1.97e-06 | 2.34e-05 | 9.67e-03 | 3.23e-02 | 1.34e-01 |          |          |          |          |          |          |      |
| GLIP      | 6.38e-09 | 1.96e-10 | 4.58e-14 | 3.58e-11 | 2.22e-11 | 1.23e-06 |          |          |          |          |          |      |
| LIP_20p   | 9.13e-10 | 6.01e-12 | 1.44e-16 | 1.05e-13 | 5.60e-14 | 6.81e-09 | 5.87e-02 |          |          |          |          |      |
| tetO      | 1.53e-09 | 1.36e-11 | 5.01e-16 | 3.18e-13 | 1.71e-13 | 1.99e-08 | 1.26e-01 | 6.76e-01 |          |          |          |      |
| PHO5      | 2.50e-10 | 3.01e-11 | 1.16e-09 | 3.94e-09 | 2.13e-08 | 2.14e-06 | 9.61e-02 | 7.08e-01 | 5.02e-01 |          |          |      |
| PhyB      | 1.60e-11 | 3.32e-13 | 6.11e-12 | 1.66e-11 | 1.02e-10 | 1.20e-08 | 1.78e-03 | 5.21e-02 | 2.55e-02 | 1.83e-01 |          |      |
| GALL      | 7.46e-11 | 5.12e-15 | 2.03e-24 | 2.74e-22 | 1.43e-23 | 1.34e-13 | 3.94e-13 | 1.44e-07 | 7.12e-09 | 3.07e-03 | 2.24e-01 |      |

1350

1351 Supplementary Table 3: p-values calculated by one-tailed t-test for initial slope ( $\dot{y}$ ) data, Figure 5 B.

1352

|           | GAL1     | CUP1     | LIP_80p  | MET3     | Z3EV     | stron... | GLIP     | LIP_20p  | tetO     | PHO5     | PhyB     | GALL |
|-----------|----------|----------|----------|----------|----------|----------|----------|----------|----------|----------|----------|------|
| GAL1      |          |          |          |          |          |          |          |          |          |          |          |      |
| CUP1      | 1e-1152  |          |          |          |          |          |          |          |          |          |          |      |
| LIP_80p   | 2.28e-21 | 1e-1107  |          |          |          |          |          |          |          |          |          |      |
| MET3      | 5.96e-82 | 3.89e-47 | 7.91e-81 |          |          |          |          |          |          |          |          |      |
| Z3EV      | 3.82e-55 | 1e-1768  | 8.18e-37 | 1.33e-15 |          |          |          |          |          |          |          |      |
| strongLOV | 8.29e-43 | 3.73e-55 | 1.69e-15 | 5.43e-50 | 1.69e-06 |          |          |          |          |          |          |      |
| GLIP      | 2.95e-83 | 2.06e-10 | 3.53e-82 | 1.43e-22 | 1e-1510  | 6.41e-53 |          |          |          |          |          |      |
| LIP_20p   | 2.74e-92 | 8.53e-25 | 2.59e-93 | 1.19e-01 | 3.13e-10 | 2.47e-55 | 6.34e-14 |          |          |          |          |      |
| tetO      | 3.75e-70 | 7.17e-20 | 1.39e-63 | 8.51e-92 | 2.52e-93 | 5.65e-35 | 1.34e-13 | 1.36e-30 |          |          |          |      |
| PHO5      | 1.04e-76 | 3.17e-94 | 4.57e-70 | 6.55e-52 | 2.90e-60 | 8.93e-35 | 7.34e-80 | 8.85e-30 | 8.40e-03 |          |          |      |
| PhyB      | 6.39e-72 | 6.53e-03 | 6.22e-53 | 1.38e-01 | 9.19e-31 | 3.65e-38 | 2.01e-01 | 3.84e-02 | 8.41e-12 | 1.51e-13 |          |      |
| GALL      | 1e-1420  | 8.48e-68 | 1e-1480  | 3.57e-12 | 1e-3195  | 1.85e-57 | 4.39e-72 | 2.42e-58 | 1e-3951  | 2.87e-11 | 1.60e-09 |      |

1353

1354 Supplementary Table 4: p-values calculated by one-tailed t-test for pairs of maximum fluorescence data, Figure 5 C.

1355

|           | GAL1     | CUP1     | LIP_80p  | MET3     | Z3EV     | stron... | GLIP     | LIP_20p  | tetO     | PHO5     | PhyB     | GALL |
|-----------|----------|----------|----------|----------|----------|----------|----------|----------|----------|----------|----------|------|
| GAL1      |          |          |          |          |          |          |          |          |          |          |          |      |
| CUP1      | 2.73e-99 |          |          |          |          |          |          |          |          |          |          |      |
| LIP_80p   | 8.81e-41 | 7.72e-67 |          |          |          |          |          |          |          |          |          |      |
| MET3      | 6.11e-96 | 4.02e-31 | 6.50e-63 |          |          |          |          |          |          |          |          |      |
| Z3EV      | 1.43e-68 | 1.03e-11 | 1.29e-21 | 2.07e-10 |          |          |          |          |          |          |          |      |
| strongLOV | 2.18e-46 | 5.53e-54 | 4.84e-02 | 8.59e-51 | 9.80e-16 |          |          |          |          |          |          |      |
| GLIP      | 1.16e-97 | 6.02e-12 | 3.15e-65 | 2.18e-03 | 2.87e-10 | 5.74e-53 |          |          |          |          |          |      |
| LIP_20p   | 1.32e-98 | 2.47e-24 | 3.59e-66 | 4.96e-10 | 2.86e-81 | 3.46e-56 | 4.23e-13 |          |          |          |          |      |
| tetO      | 1.49e-91 | 5.50e-67 | 6.48e-58 | 1.02e-39 | 5.99e-81 | 1.16e-47 | 8.07e-44 | 3.87e-03 |          |          |          |      |
| PHO5      | 4.36e-82 | 1.08e-90 | 8.14e-42 | 1.03e-74 | 3.56e-22 | 2.00e-34 | 1.05e-79 | 3.81e-37 | 2.08e-36 |          |          |      |
| PhyB      | 5.50e-10 | 9.08e-01 | 8.36e-72 | 3.25e-03 | 7.47e-56 | 2.48e-63 | 4.06e-02 | 5.31e-09 | 1.34e-14 | 5.18e-37 |          |      |
| GALL      | 5.13e-10 | 5.77e-71 | 2.36e-70 | 1.42e-15 | 1e-1233  | 2.58e-56 | 2.85e-62 | 9.01e-52 | 2.96e-96 | 1.35e-10 | 2.20e-06 |      |

1356

1357 Supplementary Table 5: p-values calculated by one-tailed t-test for pairs of steady-state fluorescence data, Figure 5  
 1358 D.

|           | GAL1     | CUP1     | LIP_80p  | MET3     | Z3EV     | stron... | GLIP     | LIP_20p  | tetO     | PHO5     | PhyB     | GALL |
|-----------|----------|----------|----------|----------|----------|----------|----------|----------|----------|----------|----------|------|
| GAL1      |          |          |          |          |          |          |          |          |          |          |          |      |
| CUP1      | 3.06e-20 |          |          |          |          |          |          |          |          |          |          |      |
| LIP_80p   | 3.76e-09 | 3.58e-16 |          |          |          |          |          |          |          |          |          |      |
| MET3      | 4.35e-05 | 6.91e-18 | 8.36e-03 |          |          |          |          |          |          |          |          |      |
| Z3EV      | 1.13e-21 | 6.36e-06 | 1.71e-14 | 5.56e-18 |          |          |          |          |          |          |          |      |
| strongLOV | 1.22e-13 | 1.48e-05 | 2.63e-09 | 3.64e-11 | 8.73e-01 |          |          |          |          |          |          |      |
| GLIP      | 2.34e-11 | 6.30e-15 | 6.25e-02 | 4.33e-05 | 2.08e-11 | 9.31e-08 |          |          |          |          |          |      |
| LIP_20p   | 2.38e-19 | 7.65e-11 | 2.58e-09 | 3.33e-14 | 1.41e-04 | 2.12e-03 | 1.88e-05 |          |          |          |          |      |
| tetO      | 2.47e-19 | 3.78e-05 | 7.79e-17 | 7.89e-18 | 3.38e-11 | 4.55e-11 | 3.30e-16 | 6.24e-14 |          |          |          |      |
| PHO5      | 8.14e-11 | 1.65e-15 | 4.65e-01 | 2.85e-04 | 6.38e-14 | 9.67e-09 | 1.53e-01 | 3.74e-09 | 2.17e-16 |          |          |      |
| PhyB      | 5.69e-12 | 1.60e-04 | 1.64e-10 | 4.47e-11 | 2.08e-07 | 1.83e-07 | 4.31e-10 | 7.84e-09 | 2.32e-01 | 2.41e-10 |          |      |
| GALL      | 9.17e-19 | 5.16e-12 | 2.50e-09 | 5.86e-16 | 3.82e-07 | 8.21e-05 | 1.61e-04 | 1.48e-01 | 2.42e-14 | 4.83e-10 | 3.74e-09 |      |

1359

1360

Supplementary Table 6: p-values calculated by one-tailed t-test for pairs of basal fluorescence data, Figure 5 E.

|           | GAL1     | CUP1     | LIP_80p  | MET3     | Z3EV     | stron... | GLIP     | LIP_20p  | tetO     | PHO5     | PhyB     | GALL |
|-----------|----------|----------|----------|----------|----------|----------|----------|----------|----------|----------|----------|------|
| GAL1      |          |          |          |          |          |          |          |          |          |          |          |      |
| CUP1      | 4.35e-14 |          |          |          |          |          |          |          |          |          |          |      |
| LIP_80p   | 7.23e-09 | 7.73e-10 |          |          |          |          |          |          |          |          |          |      |
| MET3      | 1.16e-01 | 8.20e-13 | 1.42e-03 |          |          |          |          |          |          |          |          |      |
| Z3EV      | 1.28e-12 | 2.06e-08 | 5.83e-03 | 5.61e-07 |          |          |          |          |          |          |          |      |
| strongLOV | 6.00e-10 | 2.72e-02 | 3.97e-06 | 6.46e-09 | 7.80e-05 |          |          |          |          |          |          |      |
| GLIP      | 1.29e-09 | 1.12e-07 | 4.89e-02 | 2.23e-05 | 7.00e-01 | 3.62e-04 |          |          |          |          |          |      |
| LIP_20p   | 2.20e-20 | 1.18e-04 | 1.73e-09 | 6.70e-13 | 1.05e-07 | 1.09e-01 | 7.20e-04 |          |          |          |          |      |
| tetO      | 5.32e-16 | 6.68e-03 | 7.12e-13 | 1.58e-15 | 1.47e-11 | 5.75e-06 | 1.88e-11 | 9.38e-09 |          |          |          |      |
| PHO5      | 2.65e-11 | 3.06e-09 | 3.24e-01 | 7.71e-05 | 4.41e-02 | 1.40e-05 | 1.71e-01 | 8.45e-09 | 2.51e-12 |          |          |      |
| PhyB      | 9.02e-04 | 8.52e-01 | 1.51e-02 | 2.46e-03 | 3.39e-02 | 4.39e-01 | 4.21e-02 | 1.93e-01 | 1.26e-01 | 2.13e-02 |          |      |
| GALL      | 7.24e-19 | 6.02e-05 | 5.81e-08 | 1.03e-11 | 5.02e-06 | 6.61e-02 | 3.42e-03 | 6.54e-01 | 4.76e-09 | 3.50e-07 | 1.66e-01 |      |

1361

1362

1363

Supplementary Table 7: p-values calculated by one-tailed t-test for pairs of basal fluorescence parameter (*b*), Figure 5 F.

|         | GAL1     | CUP1     | LIP_80p  | MET3     | Z3EV     | GLIP     | LIP_20p  | tetO     | PHO5     | PhyB     | GALL |
|---------|----------|----------|----------|----------|----------|----------|----------|----------|----------|----------|------|
| GAL1    |          |          |          |          |          |          |          |          |          |          |      |
| CUP1    | 1.79e-55 |          |          |          |          |          |          |          |          |          |      |
| LIP_80p | 2.23e-01 | 1.31e-50 |          |          |          |          |          |          |          |          |      |
| MET3    | 9.20e-51 | 5.69e-13 | 5.89e-55 |          |          |          |          |          |          |          |      |
| Z3EV    | 1.12e-12 | 7.42e-76 | 4.58e-11 | 1e-2238  |          |          |          |          |          |          |      |
| GLIP    | 4.08e-07 | 2.73e-67 | 1.45e-09 | 4.72e-23 | 4.68e-12 |          |          |          |          |          |      |
| LIP_20p | 5.37e-09 | 1.03e-33 | 2.43e-06 | 1.16e-84 | 4.29e-14 | 3.56e-22 |          |          |          |          |      |
| tetO    | 1.90e-61 | 4.11e-01 | 2.98e-56 | 3.20e-18 | 1.41e-12 | 1.37e-67 | 1.90e-45 |          |          |          |      |
| PHO5    | 7.35e-01 | 1.56e-55 | 1.46e-01 | 3.97e-47 | 2.65e-15 | 8.08e-06 | 9.88e-09 | 1.57e-67 |          |          |      |
| PhyB    | 2.07e-85 | 1.39e-43 | 9.94e-83 | 1e-1323  | 1.94e-03 | 1.83e-96 | 3.09e-82 | 1.99e-45 | 3.49e-97 |          |      |
| GALL    | 4.56e-02 | 6.00e-04 | 9.35e-02 | 1.81e-10 | 4.28e-18 | 5.07e-04 | 7.14e-01 | 9.86e-04 | 3.73e-02 | 1.20e-15 |      |

1364

1365

Supplementary Table 8: p-values calculated by one-tailed t-test for pairs of degradation rates (*d*) data, Figure 5 G.

|           | GAL1     | CUP1     | LIP_80p  | MET3     | Z3EV     | stron... | GLIP     | LIP_20p  | tetO     | PHO5     | PhyB     | GALL |
|-----------|----------|----------|----------|----------|----------|----------|----------|----------|----------|----------|----------|------|
| GAL1      |          |          |          |          |          |          |          |          |          |          |          |      |
| CUP1      | 1e-3924  |          |          |          |          |          |          |          |          |          |          |      |
| LIP_80p   | 1e-5525  | 1.73e-57 |          |          |          |          |          |          |          |          |          |      |
| MET3      | 1.71e-64 | 1e-4345  | 1e-5703  |          |          |          |          |          |          |          |          |      |
| Z3EV      | 2.84e-92 | 6.79e-81 | 1e-1194  | 1e-1466  |          |          |          |          |          |          |          |      |
| strongLOV | 1e-2928  | 4.28e-36 | 8.48e-01 | 1e-3710  | 3.79e-97 |          |          |          |          |          |          |      |
| GLIP      | 1e-1874  | 6.77e-28 | 4.24e-01 | 1e-2612  | 1.27e-77 | 4.00e-01 |          |          |          |          |          |      |
| LIP_20p   | 2.69e-76 | 2.97e-23 | 2.99e-04 | 1e-1450  | 1.47e-55 | 4.28e-04 | 5.74e-03 |          |          |          |          |      |
| tetO      | 5.38e-02 | 8.82e-60 | 3.74e-70 | 3.71e-17 | 2.25e-37 | 1.42e-75 | 8.52e-81 | 7.13e-85 |          |          |          |      |
| PHO5      | 3.26e-60 | 1e-1563  | 1e-1896  | 1.64e-48 | 4.90e-77 | 1e-1773  | 1e-1663  | 1e-1430  | 2.64e-66 |          |          |      |
| PhyB      | 4.21e-31 | 2.57e-49 | 5.61e-53 | 1.99e-22 | 6.69e-42 | 1.07e-53 | 1.08e-54 | 3.00e-58 | 2.47e-30 | 3.08e-01 |          |      |
| GALL      | 1e-4801  | 1.66e-89 | 2.20e-71 | 1e-5555  | 1e-2026  | 6.13e-73 | 2.42e-62 | 6.12e-34 | 1e-1341  | 1e-2564  | 1.52e-62 |      |

1366

1367

Supplementary Table 9: p-values calculated by one-tailed t-test for pairs of t-on data from Figure 5 H.

|      | GAL1     | CUP1     | MET3     | Z3EV     | tetO     | GALL |
|------|----------|----------|----------|----------|----------|------|
| GAL1 |          |          |          |          |          |      |
| CUP1 | 7.68e-26 |          |          |          |          |      |
| MET3 | 8.93e-22 | 1.69e-18 |          |          |          |      |
| Z3EV | 1.07e-03 | 8.21e-04 | 1.00e-03 |          |          |      |
| tetO | 8.41e-27 | 1.26e-12 | 9.15e-24 | 5.70e-04 |          |      |
| GALL | 1e-1872  | 1.47e-25 | 1e-1535  | 6.31e-04 | 2.04e-02 |      |

1368

1369

Supplementary Table 10: p-values calculated by one-tailed t-test for pairs of t-off data, Figure 5 I.

|           | WT       | GAL1     | CUP      | EL222    | MET      | Z3EV     | stron... | GLIP     | TETO     | PHO      | PhyB_PIF | GALL |
|-----------|----------|----------|----------|----------|----------|----------|----------|----------|----------|----------|----------|------|
| WT        |          |          |          |          |          |          |          |          |          |          |          |      |
| GAL1      | 9.12e-07 |          |          |          |          |          |          |          |          |          |          |      |
| CUP       | 1e-2689  | 1e-2667  |          |          |          |          |          |          |          |          |          |      |
| EL222     | 1e-2223  | 1e-2124  | 1e-1973  |          |          |          |          |          |          |          |          |      |
| MET       | 2.12e-75 | 5.45e-69 | 1e-2232  | 1.48e-73 |          |          |          |          |          |          |          |      |
| Z3EV      | 4.15e-60 | 1.95e-58 | 1e-1458  | 1.73e-04 | 3.28e-30 |          |          |          |          |          |          |      |
| strongLOV | 1.03e-10 | 4.90e-10 | 5.64e-25 | 9.93e-82 | 5.92e-94 | 1.86e-76 |          |          |          |          |          |      |
| GLIP      | 1.04e-54 | 2.55e-34 | 1e-2628  | 1e-1998  | 8.29e-57 | 4.15e-55 | 1.04e-10 |          |          |          |          |      |
| TETO      | 1e-1774  | 1e-1756  | 8.87e-36 | 1e-1183  | 1e-1405  | 4.68e-20 | 2.36e-02 | 1e-1722  |          |          |          |      |
| PHO       | 1.94e-24 | 2.67e-21 | 1e-2183  | 6.11e-55 | 9.69e-04 | 9.06e-36 | 3.25e-97 | 1.24e-15 | 1e-1383  |          |          |      |
| PhyB_PIF  | 6.95e-12 | 1.40e-11 | 2.53e-54 | 1.49e-03 | 2.79e-07 | 2.03e-02 | 2.45e-27 | 5.40e-11 | 1.55e-35 | 2.40e-08 |          |      |
| GALL      | 2.62e-13 | 3.98e-12 | 1e-2057  | 4.63e-24 | 4.50e-12 | 3.58e-16 | 1.14e-88 | 1.18e-11 | 1e-1266  | 9.95e-18 | 1.85e-05 |      |

1370

1371

1372

Supplementary Table 11: p-values calculated by one-tailed t-test for pairs of leakiness measurements data from Figure 6 A.

1373

|            | WT_D     | GAL1_D   | GAL1_R   | GALL...  | GALL...  | GLIP_D   | GLIP_R   | GLIP_RG  | PhyB_R   | PhyB...  | PhyB... |
|------------|----------|----------|----------|----------|----------|----------|----------|----------|----------|----------|---------|
| WT_D       |          |          |          |          |          |          |          |          |          |          |         |
| GAL1_D     | 5.88e-05 |          |          |          |          |          |          |          |          |          |         |
| GAL1_R     | 9.12e-07 | 3.81e-01 |          |          |          |          |          |          |          |          |         |
| GALL_in_D  | 1.11e-16 | 3.12e-05 | 1.08e-03 |          |          |          |          |          |          |          |         |
| GALL_in_R  | 2.62e-13 | 1.72e-12 | 3.98e-12 | 1.21e-12 |          |          |          |          |          |          |         |
| GLIP_D     | 1.04e-54 | 1.07e-36 | 2.55e-34 | 1.26e-23 | 1.18e-11 |          |          |          |          |          |         |
| GLIP_R     | 1.61e-18 | 7.89e-18 | 1.78e-18 | 2.83e-18 | 5.76e-13 | 1.82e-17 |          |          |          |          |         |
| GLIP_RG    | 1e-2233  | 1e-2203  | 1e-2198  | 1e-2181  | 1e-1145  | 1e-2134  | 3.26e-02 |          |          |          |         |
| PhyB_R     | 1.37e-06 | 6.33e-06 | 8.63e-06 | 2.37e-05 | 1.75e-06 | 2.28e-04 | 1.02e-10 | 1.79e-10 |          |          |         |
| PhyB_R_PCB | 6.95e-12 | 1.24e-11 | 1.40e-11 | 2.10e-11 | 1.85e-05 | 5.40e-11 | 5.42e-09 | 1.92e-11 | 4.11e-08 |          |         |
| PhyB_D_PCB | 5.75e-18 | 1.58e-17 | 1.95e-17 | 3.93e-17 | 1.57e-06 | 2.05e-16 | 9.74e-23 | 3.38e-28 | 9.92e-11 | 2.72e-01 |         |

1374

1375

Supplementary Table 12: p-values calculated by one-tailed t-test for pairs of the leakiness data from Figure 6 B.

1376

|           | GAL1     | CUP1     | LIP      | MET      | Z3EV     | stron... | GLIP     | LIP_20p  | tetO     | PHO      | PhyB     | GALL |
|-----------|----------|----------|----------|----------|----------|----------|----------|----------|----------|----------|----------|------|
| GAL1      |          |          |          |          |          |          |          |          |          |          |          |      |
| CUP1      | 1.09e-03 |          |          |          |          |          |          |          |          |          |          |      |
| LIP       | 2.87e-01 | 8.09e-24 |          |          |          |          |          |          |          |          |          |      |
| MET       | 4.86e-09 | 1.27e-13 | 2.32e-66 |          |          |          |          |          |          |          |          |      |
| Z3EV      | 3.54e-01 | 2.53e-08 | 2.56e-02 | 1.01e-27 |          |          |          |          |          |          |          |      |
| strongLOV | 1.06e-03 | 2.21e-01 | 3.02e-09 | 1.56e-03 | 2.28e-05 |          |          |          |          |          |          |      |
| GLIP      | 8.43e-02 | 2.84e-07 | 7.21e-09 | 2.27e-37 | 2.00e-02 | 7.30e-04 |          |          |          |          |          |      |
| LIP_20p   | 1.41e-05 | 4.70e-03 | 1.22e-14 | 1.31e-01 | 5.04e-09 | 8.27e-02 | 2.45e-07 |          |          |          |          |      |
| tetO      | 1.67e-16 | 4.13e-25 | 1.59e-62 | 1.53e-08 | 1.10e-38 | 1.56e-10 | 1.78e-42 | 1.22e-06 |          |          |          |      |
| PHO       | 6.85e-08 | 2.04e-10 | 3.68e-62 | 7.87e-02 | 2.80e-24 | 1.10e-02 | 4.87e-33 | 3.32e-01 | 3.07e-11 |          |          |      |
| PhyB      | 9.12e-08 | 1.49e-67 | 9.33e-24 | 2.43e-11 | 1.69e-23 | 6.72e-31 | 4.15e-47 | 1.20e-39 | 8.72e-10 | 4.31e-10 |          |      |
| GALL      | 2.74e-01 | 8.88e-15 | 1.75e-04 | 4.33e-56 | 3.33e-01 | 7.62e-06 | 4.58e-03 | 3.01e-10 | 4.68e-53 | 5.94e-52 | 2.20e-39 |      |

1377

1378

Supplementary Table 13: p-values calculated by one-tailed z-test for pairs of area doubling time data from Figure 7.

1379

1380 Supplementary Table 14-16: Numbers of cells used in the experiments

| Inducible system                       | Number of cells at time t = 0 h | Number of cells at time t = 3.5 h | Number of cells present at the time of shut-off | Relevant figures |
|----------------------------------------|---------------------------------|-----------------------------------|-------------------------------------------------|------------------|
| <i>GAL1pr</i>                          | 30                              | 129                               |                                                 | 2, 5, 6, 7, 8, 9 |
| <i>LIP</i>                             | 35                              | 110                               |                                                 | 2, 5, 6, 7, 8, 9 |
| <i>PHO5pr</i>                          | 46                              | 232                               |                                                 | 2, 5, 6, 7, 8, 9 |
| <i>t-tetOpr</i>                        | 92                              | 534                               |                                                 | 2, 5, 6, 7, 8, 9 |
| <i>tetOpr</i>                          | 66                              | 366                               |                                                 | 2, 5, 6, 7, 8, 9 |
| <i>MET3pr</i>                          | 84                              | 306                               |                                                 | 2, 5, 6, 7, 8, 9 |
| <i>GLIP</i>                            | 37                              | 135                               |                                                 | 2, 5, 6, 7, 8, 9 |
| <i>CUP1pr</i>                          | 62                              | 229                               |                                                 | 2, 5, 6, 7, 8, 9 |
| <i>GALL</i>                            | 73                              | 177                               |                                                 | 2, 5, 6, 7, 8, 9 |
| Z <sub>3</sub> EV                      | 66                              | 190                               |                                                 | 2, 5, 6, 7, 8, 9 |
| PhyB-PIF3                              | 37                              | 81                                |                                                 | 2, 5, 6, 7, 8, 9 |
| wt-El222- <i>LIP</i><br>20% induction  | 70                              | 300                               |                                                 | 13               |
| strongLOV- <i>LIP</i><br>20% induction | 22                              | 78                                |                                                 | 13               |
| <i>GAL1pr</i> shut-off                 |                                 |                                   | 185                                             | 5                |
| <i>LIP</i> shut-off                    |                                 |                                   | 113                                             | 5                |
| <i>tetOpr</i> shut-off                 |                                 |                                   | 103                                             | 5                |

1381 Supplementary Table 14: Number of cells used in experiments shown in Figures 2, 5, 6, 7, 8, 9 and 13.

1382

| Construct                                                          | Number of cells at t = 0 | Number of cells at time t = 3.5 h | Relevant figures |
|--------------------------------------------------------------------|--------------------------|-----------------------------------|------------------|
| <i>MET3pr-yEVenus</i> integrated at chrV in <i>MET17-WT</i> strain | 24                       | 73                                | 3A, B            |
| <i>MET3pr-yEVenus</i> integrated at chrI in <i>MET17-WT</i> strain | 22                       | 60                                | 3A               |
| <i>MET3pr-yEVenus</i> integrated at chrV in <i>met17Δ</i> strain   | 27                       | 39                                | 3B               |

1383 Supplementary Table 15: Number of cells in experiments shown in Figure 3.

1384

| Inducible system   | Number of cells | Relevant figures |
|--------------------|-----------------|------------------|
| WT cells           | 329             | 6 A, 6 B         |
| <i>CUP1pr</i>      | 846             | 6 A              |
| <i>GAL1pr</i> in R | 1703            | 6 A, 6 B         |
| <i>GALL</i> in R   | 951             | 6 A, 6 B         |
| <i>GLIP</i> in D   | 3510            | 6 A              |

|                            |      |          |
|----------------------------|------|----------|
| <i>LIP</i>                 | 762  | 6 A      |
| <i>PHO5pr</i>              | 277  | 6 A      |
| <i>MET3pr</i>              | 431  | 6 A      |
| <i>tetOpr</i>              | 505  | 6 A      |
| Z <sub>3</sub> EV          | 201  | 6 A      |
| PhyB-PIF3 with PCB in R    | 143  | 6 A, 6 B |
| PhyB-PIF3 without PCB in R | 145  | 6 B      |
| PhyB-PIF3 with PCB in D    | 111  | 6 B      |
| <i>GAL1pr</i> in D         | 586  | 6 B      |
| <i>GALL</i> in D           | 820  | 6 B      |
| <i>GLIP</i> in R           | 758  | 6 B      |
| <i>GLIP</i> in RG          | 1364 | 6 B      |

Supplementary Table 16: Number of cells used in experiments shown in Figure 6.

1385

1386

| Genetic construct/condition                                | Number of cells | Relevant figures        |
|------------------------------------------------------------|-----------------|-------------------------|
| <i>ARG3pr-yEVENUS</i> in SCD+Met                           | 321             | 10                      |
| <i>ARG3pr-yEVENUS</i> in SMM                               | 69              | 10                      |
| <i>ARG3pr-yEVENUS</i> in SMM + essential nutrients         | 120             | 10                      |
| <i>ARG3pr-ARG3-mNeonGreen</i> in SCD+Met                   | 560             | Supplementary Figure 10 |
| <i>ARG3pr-ARG3-mNeonGreen</i> in SMM                       | 179             | Supplementary Figure 10 |
| <i>ARG3pr-ARG3-mNeonGreen</i> in SMM + essential nutrients | 677             | Supplementary Figure 10 |

Supplementary Table 17: Number of cells used in experiments shown in Figure 10.

1387

1388

| Strain                           | Experiment              | Number of scored cells | Relevant figures |
|----------------------------------|-------------------------|------------------------|------------------|
| <i>clnΔ*</i>                     | 20% light, 0 min delay  | 124                    | 15 B             |
| <i>clnΔ* clb1,2Δ* LIP-CLB2kd</i> | 20% light, 0 min delay  | 47                     | 15 B             |
| <i>clnΔ*</i>                     | 80% light, 0 min delay  | 137                    | 15 C             |
| <i>clnΔ* clb1,2Δ* LIP-CLB2kd</i> | 80% light, 0 min delay  | 86                     | 15 C             |
| <i>clnΔ* clb1,2Δ* LIP-CLB2kd</i> | 80% light, 20 min delay | 99                     | 15 C             |
| <i>clnΔ* clb1,2Δ*</i>            | N/A                     | 114                    | 15 B, 15 C       |

Supplementary Table 18: Number of cells used in experiments shown in Figure 15.

1389

1390

1391 Supplementary Note 1: Environments used for system induction and deactivation

1392 *Media used for induction experiments*

1393 Standard synthetic complete media without methionine (SC-Met)<sup>126</sup> was used as the basis for other media, with  
1394 modifications specific for each system detailed below. We used 2% w/v glucose (D), 3% w/v raffinose (R), or 3% w/v  
1395 glucose (G).

1396 *Media for MET3pr induction experiments*

1397 Non-inducing: SCD+10x Met (1x Met = 0.02g/mL). Inducing condition: SCD-Met.

1398 *Media for CUP1pr induction experiments*

1399 Non-inducing condition: To make SCD-Met-Cu<sup>2+</sup>, we used yeast nitrogen base without copper (Formedium, UK).

1400 Inducing condition: SCD-Met-Cu<sup>2+</sup> with CuSO<sub>4</sub> added (0.3 mM).

1401 *Media for PHO5pr induction experiments*

1402 Non-inducing condition: SCD-Met. Inducing condition: To make SCD-Met-Pi (Pi – inorganic phosphate) we used  
1403 yeast nitrogen base without ammonium-sulfate, without phosphates and without sodium-chloride (MP Biomedicals  
1404 4027-812).

1405 *Media for GAL1pr and GALL induction experiments*

1406 Non-inducing condition: SCR-Met. Inducing condition: SCRG-Met (1x raffinose and 1x galactose).

1407 *Media for tetOpr and t-tetOpr induction experiments*

1408 Non-inducing condition: SCD-Met. Inducing condition: SCD-Met with doxycycline added (10 μM).

1409 *Media for ARG3pr induction experiments*

1410 Non-inducing condition: SDC-Met+10xArg (1x Arg = 0.02 g/L of L-arginine monohydrochloride). Inducing  
1411 condition: SCD-Met-Arg.

1412 For experiments with *ARG3pr*, we also used synthetic minimal media (SMM), containing yeast nitrogen base without  
1413 all amino acids and without ammonium sulfate, sodium hydroxide, succinic acid, and glucose; as well as  
1414 SMM+AWHL – Synthetic minimal media with adenine, tryptophan, histidine and leucine, for which the strain we  
1415 used was auxotrophic.

1416 *Media for Z3EVpr induction experiments*

1417 Non-inducing condition: SCD-Met. Inducing condition: SCD-Met+0.5 μM β-estradiol (diluted from 100x ethanol  
1418 solution; kept in glass container).

1419 *Light conditions for the El222-LIP, El222-GLIP, and strongLOV-LIP system*

1420 We used the diascopic LED light source of the Nikon Ti2-E microscope for induction. To tune the strength of the  
1421 inducer, we scaled the level of the input white light to 20%, 40%, or 80% of the maximal intensity, depending on  
1422 the experiment presented in the manuscript. At maximal strength, the diascopic light produces a beam of white light  
1423 with 19.60 mW power distributed over a planar circle area with diameter 8.5 mm (average light intensity of 443.67  
1424 W/m<sup>2</sup>), as measured by an optical power meter (Thorlabs, US) equipped with an ND2 filter and a S120C sensor  
1425 (Thorlabs, US) set to a wavelength of 447 nm.

1426 *Light conditions for the PhyB-PIF3 system*

1427 Unless otherwise stated, cells in which PhyB-PIF3 was induced were incubated with PCB for at least 2 h (final  
1428 concentration of 31.25  $\mu$ M, diluted from 100x DMSO stock) in the SCR media in darkness. Manipulations during the  
1429 pre-induction period were performed under green light which does not cause the degradation of PCB. Non-inducing  
1430 condition: 16 far-red LEDs with a radiation power of 200 mW each and 750 nm emission peak (Roithner  
1431 LaserTechnik, Austria) assembled on a breadboard and placed above the cell microfluidic chamber at a  $\approx$  5 cm  
1432 distance. Inducing condition: 16 red LEDs with a luminosity of 2500 mcd each and 648 nm emission peak (Mouser  
1433 Electronics, US) assembled on a breadboard and placed above the cell microfluidic chamber at a  $\approx$  5 cm distance.

1434



## 1435 Supplementary Note 2: Measuring yEVENUS maturation rate

1436 To limit the space of model parameters to fit to experimental data, we measured the yEVENUS protein  
1437 maturation rate,  $f$ , directly under our experimental conditions. We blocked protein translation using  
1438 cycloheximide in cells in which the fluorescent protein is expressed briefly, as in ref.<sup>43</sup>. Specifically, after  
1439 growing cells in non-inducing media, we turned on *MET3pr-yEVENUS* (without the *PEST* sequence) for  
1440 30 min, and then turned it off while at the same administering cycloheximide (at a final concentration of  
1441 20  $\mu\text{g}/\text{mL}$ ) which blocks protein synthesis. For an accurate estimation of the maturation rate, we used  
1442 frequent imaging (every 3 min) but of only a small number of large colonies to avoid photobleaching.

1443 In this experiment, fluorescence levels increase upon brief promoter induction and remain stable  
1444 after fluorescent protein maturation (Supplementary Fig. 12 A). Since cells stop growing due to the  
1445 translational block and fluorescent proteins have a half-life of several hours in these cells<sup>127</sup>, the maturation  
1446 of the already translated fluorescent protein is the only process affecting fluorescence levels. With respect  
1447 to the model presented in Fig. 5 A, this means that  $d$  is approximately zero, which leaves  $f$  as the only  
1448 parameter influencing the fluorescence. We thus estimated  $f$ , the maturation rate of yEVENUS, by fitting  
1449 the observed single cell fluorescence levels to:

$$1450 \quad F(t) = F_0 + (F_\infty - F_0) (1 - e^{-ft}),$$

1451 where  $F(t)$  is the level of fluorescence over time,  $F_0$  is the level in the beginning of the experiment and  
1452  $F_\infty$  is the final level. Since there is a lag in the induction of *MET3pr-yEVENUS* with respect to the media  
1453 change, to estimate the maturation rate accurately, we used the timepoints during which the fluorescence  
1454 level averaged across the population was rising from 5% of  $(F_\infty - F_0)$  to 95% of  $(F_\infty - F_0)$ . After fitting  
1455 the expression levels on single-cell data ( $N = 34$ ) to the linearized equation for maturation dynamics ( $f \cdot$   
1456  $t = \ln(\frac{F_\infty - F(0)}{F_\infty - F(t)})$ ), we obtained the mean maturation half-life,  $T_m = \frac{\ln(2)}{f}$ , of  $(16.74 \pm 0.69)$  min (mean  $\pm$   
1457 s.e.m.) (Supplementary Fig. 12 B), a value which is in agreement with previous measurements of Venus  
1458 maturation dynamics *in vivo*<sup>30,32,43</sup>.

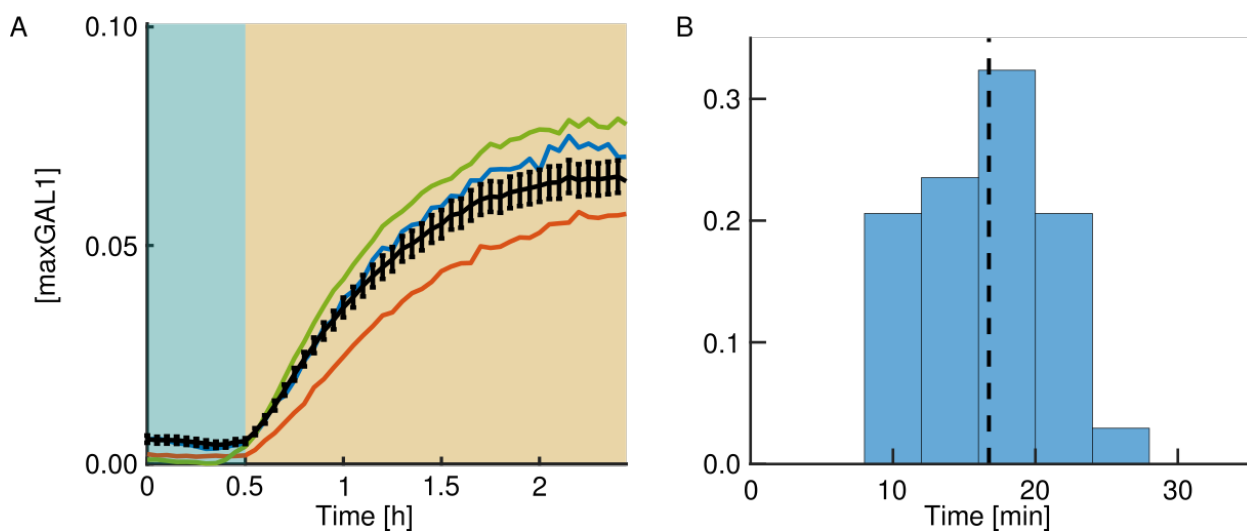

1459 Supplementary Figure 12. Estimation of yEVENUS maturation rate in budding yeast using a translational block A:  
1460 Cells with the *MET3pr-yEVENUS* construct were grown in methionine-rich medium ( $t < 0$  h), then exposed to a brief  
1461 pulse of no-methionine medium from  $t = 0$  h to  $t = 0.5$  h, which induces the circuit (blue background). After this,  
1462 cycloheximide was added (yellow background). Black line denotes the average fluorescence level over time (standard  
1463 errors of the mean (SEM) shown). Colored lines show representative single-cell time courses. B: Histogram of  
1464 estimated yEVENUS maturation half-lives from the single-cell data. Dashed line shows the mean maturation half-life,  
1465  $T_m = 16.74$  min.  
1466

### 1467 Supplementary Note 3: Measuring half-life of yEVENUS-PEST fusion protein

1468 The fit in Fig. 8 suggests that active degradation mediated by the PEST degron and dilution due to growth  
1469 in glucose media contribute about equally to the degradation-and-dilution parameter  $d$  with half-lives of  
1470 around 90 min each. However, previous work on the PEST degron also used the last 178 amino acids from  
1471 the Cln2 protein's C-terminus and showed that the half-life of yEGfp3 fused to PEST is between 20 and  
1472 30 min.<sup>61</sup> This value was determined by observing fluorescence decay after a cycloheximide block in a  
1473 *S150-2B* budding yeast strain grown in YPD medium, and was validated by western blot quantification.  
1474 To verify the degradation rate we obtained from the model fit under our experimental conditions, we  
1475 measured the half-life of *yEVENUS-PEST* in our *W303* cells directly.

1476 We performed a time-course experiment in which we monitored the decay of fluorescence after  
1477 a cycloheximide translational block. Cells with the *MET3pr-yEVENUS-PEST* construct were initially  
1478 grown in conditions that induce the circuit. Then, we either added methionine to shut off *yEVENUS-PEST*  
1479 expression in control cells or methionine and cycloheximide to additionally shut off translation. By fitting  
1480 a linear regression to the log of the fluorescence values at timepoints after which cycloheximide takes  
1481 effect as judged by the abrupt decline of growth, we estimated the growth rate of the cells and the decay  
1482 rate of yEVENUS-PEST for both experimental conditions (Supplementary Fig. 13). The extracted growth  
1483 doubling time of cells without cycloheximide is  $T_{g1/2} = 89.71$  min (95% confidence interval: 88.89 min –  
1484 90.56 min) while the degradation-and-dilution half-life of yEVENUS-PEST is  $T_{d1/2} = 43.62$  min (95%  
1485 confidence interval: 43.62 min – 45.59 min). As expected, cells effectively stop growing in cycloheximide,  
1486 and we measured the growth doubling time to be  $T_{g1/2} = 24.83$  h (95% confidence interval: 22.98 h – 27.00  
1487 h), and is reflected in the larger protein degradation-and-dilution half-life of  $T_{d1/2} = 86.10$  min (95%  
1488 confidence interval: 84.40 min – 87.86 min). The differences between the degradation rates and the  
1489 growth rates give the half-lives for the component of the decay which is due to active degradation  
1490 mediated by the PEST degron. These values are  $T_{PEST} = 91.37$  min in the case where cycloheximide is  
1491 present, and  $T_{PEST} = 88.62$  min for cells in rich media with methionine.

1492 These values are in agreement with the results in Fig. 8, suggesting that PEST indeed destabilized  
1493 the yEVENUS-PEST in our *W303* cells less compared to yEGfp3-PEST in the *S150-2B* background in  
1494 previous work<sup>61</sup> Moreover, the overall degradation-and-dilution half-life of yEVENUS-PEST expressed  
1495 from *MET3pr* in the *W303* genetic background and in synthetic complete media with methionine studied  
1496 elsewhere was around 39 min<sup>43</sup> which is in agreement with 43 min we observe. Thus, the differences in  
1497 the PEST degradation rate can be due to differences in media or, more plausibly, genetic backgrounds of  
1498 the strains, or specifically differences in the *PEST* sequence encoding the last 178 amino acids (exact *PEST*  
1499 sequence in *S150-2B* budding yeast strain was not available from the research article<sup>61</sup> nor from  
1500 yeastgenome.org).

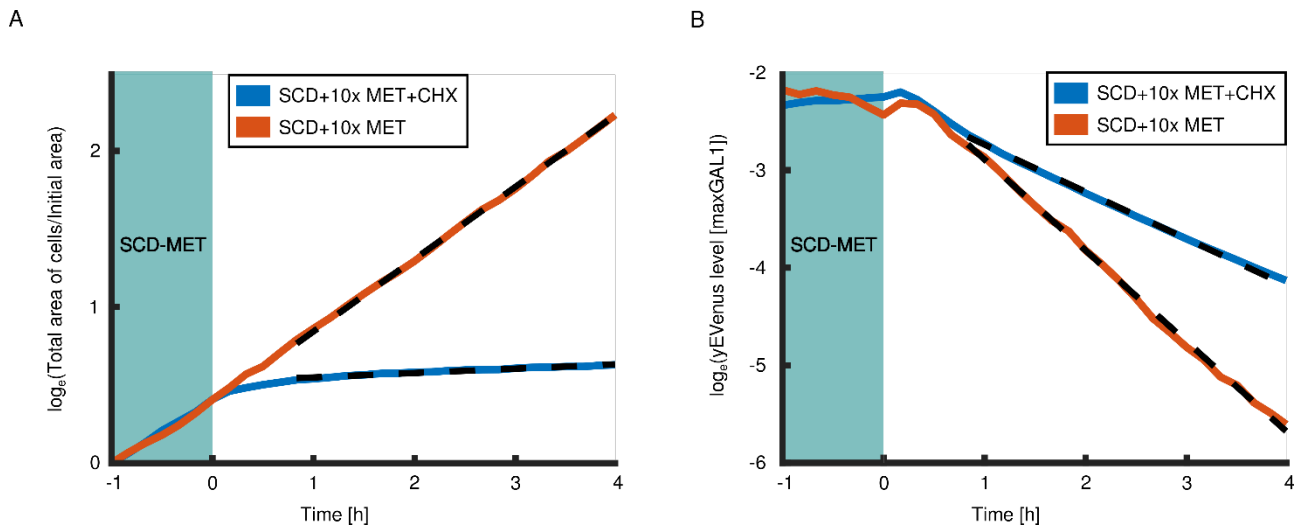

1501

1502 Supplementary Figure 13. Measuring the half-life of yEVENUS-PEST using a translational block. We exposed cells  
1503 expressing *MET3pr-yEVENUS-PEST* to cycloheximide (CHX,  $c = 20 \mu\text{g}/\text{mL}$ ) and monitored yellow fluorescence  
1504 (orange curve, panel A) and growth (orange curve, panel B). At the same time, we administered only methionine  
1505 (MET) at 10x concentration, which turns off the genetic circuit, to another group of cells (blue curve in panels A and  
1506 B). Prior to exposure to different media ( $t < 0$  h), both groups of cells were grown in synthetic complete media lacking  
1507 methionine (SCD-MET, blue background in panels A and B). Due to faster growth and dilution, yellow fluorescence  
1508 averaged over cell area decayed faster in cells without cycloheximide. To extract the growth and decay rates, we fit  
1509 linear functions to the log of the fluorescence values (dashed lines close to orange and blue curves in panels A and  
1510 B). To subtract the delay with which cycloheximide shuts down translation, we used the timepoints from  $t = 40$  min  
1511 to  $t = 4$  h for the fit. By finding the differences in the overall degradation rate and the dilution rate, we determined  
1512 the half-life of yEVENUS-PEST for both groups of cells (values in the main text). The number of cells at  $t = 0$  h was  
1513 163 for the group of cells treated with cycloheximide and 26 for the group of cells grown in SCD+10xMET, while at  
1514  $t = 4$  h these values were 170 and 160, respectively. In panel A, the total area of cells was scaled by the initial area,  
1515 hence starting at zero after the logarithm was applied.

1516

1517 Supplementary Note 4: Single-copy integration search procedure

1518 To verify that cells have only one copy of the *promoter-yEVENUS-PEST* reporter, we devised a PCR-based  
 1519 procedure that allowed us to distinguish between single and multiple copy insertions. For this, we  
 1520 designed two pairs of primers: p fwd /p rev (p - plasmid) and g fwd /g rev (g - genome) (sequences given  
 1521 in Supplementary Table 19). Both pairs of primers amplify the region containing the *URA3* gene with the  
 1522 difference that the p primers anneal to the plasmid backbone only, while the g primers anneal to the yeast  
 1523 genome only. Since the plasmids were cut inside the plasmid's *URA3* gene for transformation and  
 1524 insertion, in case of single copy integrations, the p pair of primers should not give a PCR amplicon  
 1525 (Supplementary Figure 14). On the other hand, if the plasmid is integrated in the genome in multiple  
 1526 copies, the p pair of primers will produce an amplicon. With this test, we screened for colonies that showed  
 1527 no PCR product with the p primer pair. To be certain that the lack of amplification was not due to low  
 1528 DNA quality or problems with the PCR reaction, we also performed PCR using the g fwd/p rev and p  
 1529 fwd/g rev pairs of primers, which should show amplification of the DNA regardless of the copy numbers  
 1530 of the reporters. We then only used the strains that showed amplification with g fwd/p rev and p fwd/g  
 1531 rev and no amplification with the p fwd/p rev pair of primers. This also confirmed that the construct is  
 1532 integrated in the *URA3* locus. We repeated this analysis at least twice with PCR reactions performed on  
 1533 independent genomic DNA extractions.

1534 To perform an additional check that strains contained only one copy of the genetic circuit, we  
 1535 designed our *PEST* removal strategy so that strains that do not contain the *PEST* sequence become uracil  
 1536 auxotrophs only in case there is a single copy of *URA3* in the genome. After the transformation with the  
 1537 *KanMX*-marked *PEST*-removal plasmid, strains were dead on plates lacking uracil, confirming again that  
 1538 the *promoter-yEVENUS-PEST* construct was present as a single copy.

1539 Supplementary Figure 14. Single and multiple-copy integrations can be distinguished by a PCR-based strategy.

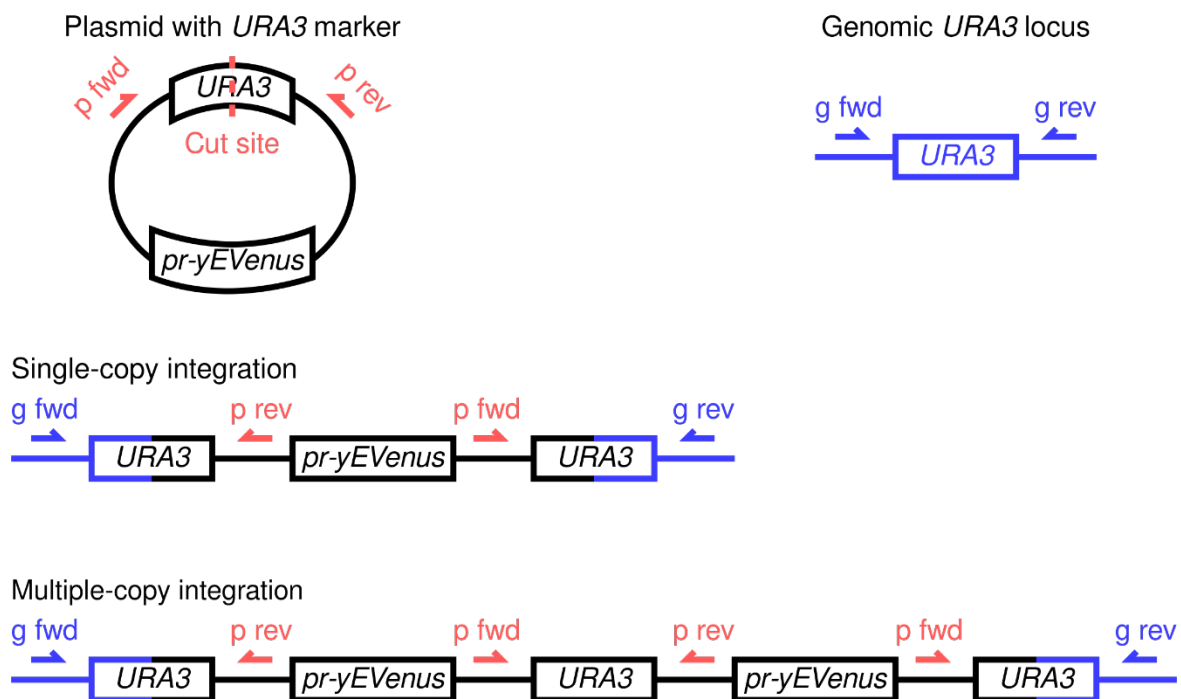

1540

| Primer name | Primer sequence      |
|-------------|----------------------|
| p fwd       | GGCTGGCTTAACTATGCG   |
| p rev       | CCTGATGCGGTATTTTCTCC |

|       |                       |
|-------|-----------------------|
| g fwd | TAATGTGGCTGTGGTTTCAGG |
| g rev | TTCTGGCGAGGTATTGGATA  |

1541

Supplementary Table 19. Primer sequences used for checking single-copy integrations

1542

1543 Supplementary Note 5: DNA sequences of the promoters

1544 Promoters were cloned between **BamHI** and **PacI** restriction sites, unless otherwise specified.

1545 pVG9: *LIP* (5 El222 binding sites, also known as pCL120 + minimal promoter)

1546 GGATCCTACGTGAGTTCGCCAGCTTCGAGTAGGTAGCCTTTAGTCCATGCGTTATAGGTAGCCTTT  
1547 AGTCCATGCGTTATAGGTAGCCTTTAGTCCATGCGTTATAGGTAGCCTTTAGTCCATGCGTTATAG  
1548 GTAGCCTTTAGTCCATGCTTAAGAGACACTAGAGGGTATATAATGGAAGCTCGACTTCCAGCTTG  
1549 GCAATCCGGTACTGTTGGTAAAGCCACCGCGGCCGCTAAAATCTTAATTAA

1550 pVG10: *GALL* promoter

1551 GGATCCGGGACAGCCCTCCGAAGGAAGACTCTCCTCCGTGCGTCCTCGTCTTCACCGGTCCGGTTC  
1552 CTGAAACGCAGATGTGCCTCGCGCCGCACTGCTCCGAACAATAAAGATTCTACAATACTAGCTTT  
1553 TATGGTTATGAAGAGGAAAAATTGGCAGTAACCTGGCCCCACAAACCTTCAAATGAACGAATCA  
1554 AATTAACAACCATAGGATGATAATGCGATTAGTTTTTTAGCCTTATTTCTGGGGTAATTAATCAGC  
1555 GAAGCGATGATTTTTGATCTATTAACGGATATATAAATGCAAAAACCTGCATAACCACTTTAACTA  
1556 ATACTTTCAACATTTTCGGTTTGTATTACTTCTTATTCAAATGTAATAAAAAGTATCAACAAAAAAT  
1557 TGTTAATATACCTCTATACTTTAACGTCAAGGAGAAAAAACCCGGATTCTAATTAATTAA

1558 pVG11: *GLIP* (5 El222 binding sites, also known as pC120, surrounded by **GAL1** promoter with **Mig1**  
1559 binding sites but without upstream activating sequence)

1560 GGATCCGGTACCCCTCGAGGAATTTCAAAAATTCTTACTTTTTTTTTGGATGGACGCAAAGAA  
1561 GTTTAATAATCATATTACATGGCATTACCACCATATACATATCCATATACATATCCATATCTAATC  
1562 TTACTTATATGTTGTGGAAATGTAAAGAGCCCCATTATCTTAGCCTAAAAAACCTTCTCTTTGGA  
1563 ACTTTCAGTAATACGCTTAAGTCTCATTGCTATATTGAAGTGCAGCCGCGGGAGATCTTCGCTAG  
1564 CCTCGAGTAGGTAGCCTTTAGTCCATGCGTTATAGGTAGCCTTTAGTCCATGCGTTATAGGTAGCC  
1565 TTTAGTCCATGCGTTATAGGTAGCCTTTAGTCCATGCGTTATAGGTAGCCTTTAGTCCATGAAGCT  
1566 TAGACACTAGAGGGACTAGACCGTGCGTCCTCGTCTTCACCGGTCGCGTTCCTGAAACGCAGATG  
1567 TGCTCGCGCCGCACTGCTCCGAACAATAAAGATTCTACAATACTAGCTTTTATGGTTATGAAGA  
1568 GGAAAAATTGGCAGTAACCTGGCCCAAAACCTTCAAATGAACGAATCAAATTAACAACCATA  
1569 GGATGATAATGCGATTAGTTTTTTAGCCTTATTTCTGGGGTAATTAATCAGCGAAGCGATGATTTT  
1570 TGATCTATTAACAGATATATAAATGCAAAAACCTGCATAACCACTTTAACTAATACTTTCAACATTT  
1571 TCGGTTTGTATTACTTCTTATTCAAATGTAATAAAAAGTATCAACAAAAAATTGTTAATATACCTCT  
1572 ATACTTTAACGTCAAGGAGAAAAAACTATATTAATTAA

1573 pVG45: *CUP1* promoter

1574 GGATCCTAAGCCGATCCCATTACCGACATTTGGGGGCTATACGTGCATATGTTTCATGTATGTATCT  
1575 GTATTTAAAACACTTTTGTATTATTTTTCCTCATATATGTGTATAGGTTTATACGGATGATTTAATT  
1576 ATTACTTCACCACCCTTTATTTTCAGGCTGATATCTTAGCCTTGTACTAGTTAGAAAAAGACATTT  
1577 TTGCTGTCAAGTCAAGAGATTCTTTTGGTGGCATTCTTCTAGAAGCAAAAAGAGCGATGC  
1578 GTCTTTTCCGCTGAACCGTTCAGCAAAAAGACTACCAACGCAATATGGATTGTCAGAATCATA  
1579 TAAAAGAGAAGCAAATAACTCCTTGTCTTGTATCAATTGCATTATAATATCTTCTTGTAGTGCAA  
1580 TATCATATAGAAGTCATCGAAATAGATATTAAGAAAAACAACTGTACAATCAATCAATCAATCA  
1581 TCACTTAATTAA

1582 pVG46: *PHO5* promoter (cloned with **BsWI** and **PacI** restriction enzymes since there is a **BamHI** cutsite  
1583 inside the *PHO5* promoter)

1584 CGTACGCAATGTTTCCTTGGTTATCCCATCGCCAATAATTTTTATTTTTACCACTGTTGAAGAAGCG  
1585 AAAGAAAAAAAAAAGGGAAAATCAAAACATTCCCTGTGCTACTAATAGAAGAAAACAAGAGACTC  
1586 CGTCCCTCTTTAGTGAGAAAATTGACCAGAGATGGTTTTTGTCCATCTTTTCGCAAAAAATTAGTT  
1587 CTATTTTTTACACATCGGACTGATAAGTTACTACTGCACATTGGCATTAGCTAGGAGGGGCATCCA  
1588 AGTAATAATTGCGAGAAACGTGACCCAACCTTTGTTGTAGGTCCGCTCCTTCTAATAATCGCTTGTA  
1589 TCTCTACATATGTTCTATTTACTGACCGAAAGTAGCTCGCTACAATAATAATGTTGACCTGATGTC  
1590 AGTCCCCACGCTAATAGCGGCGTGTGCGACGCTCTCTTTACAGGACGCCGGAGACCGGCATTACA  
1591 AGGATCCGAAAGTTGTATTCAACAAGAATGCGCAAATATGTCAACGTATTTGGAAGTCATCTTAT  
1592 GTGCGCTGCTTTAATGTTTTCTCATGTAAGCGGACGTCGTCTATAAACTTCAAACGAAGTAAAA  
1593 GGTTTCATAGCGCTTTTTCTTTGTCTGCACAAAGAAATATATATTTAAATTAGCACGTTTTTCGCATAG  
1594 AACGCAACTGCACAATGCCAAAAAAGTAAAAGTGATTTAAAGAGTTAATTGAATAGGCAATCT  
1595 CTAAATGAATCGATACAACCTTGGCACTCACACGTGGGACTAGCACAGACTAAATTTATGATTCT  
1596 GGTCCCTGTTTTCGAAGAGATCGCACATGCCAAATTATCAAATTGGTCACCTTACTTGGCAAGGC  
1597 ATATACCCATTTGGGATAAGGGTAAACATCTTTGAATTGTGCGAAATGAAACGTATATAAGCGCTG  
1598 ATGTTTTGCTAAGTCGAGGTTAGTATGGCTTCATCTCTCATGAGAATAAGAACAACAACAATAG  
1599 AGCAAGCAAATTCGAGATTACCATTAAATTAA

1600 pVG47: *tetOpr* (based on [tet operator](#) sequence)

1601 GGATCCAGATCCGCTAGGGATAACAGGGTAATATAGATCAATTCCTCGATCCCTATCAGTGATAG  
1602 AGAGTCGACAAAGTCGAGTTTCTCGATCGAGACCACTGCATGCATGTGCTCTGTATGTATATAAA  
1603 ACTCTTGTCTTTCTTCTTTTCTCTAAATATTCTTTCTTATACATTAGGTCCTTTGTAGCATAAATTAC  
1604 TATACTTCTATAGACACGCAAACACAAATACACACACTAAATTACCGGATCAATTCGGTTAATTA  
1605 A

1606 pVG49: *GAL1* promoter

1607 GGATCCTTTGGATGGACGCAAAGAAGTTTAATAATCATATTACATGGCATTACCACCATATACAT  
1608 ATCCATATCTAATCTTACTTATATGTTGTGGAAATGTAAAGAGCCCCATTATCTTAGCCTAAAAAA  
1609 ACCTTCTCTTTGGAACCTTTCAGTAATACGCTTAACTGCTCATTGCTATATTGAAGTACGGATTAGA  
1610 AGCCGCCGAGCGGGCGACAGCCCTCCGACGGAAGACTCTCCTCCGTGCGTCCCTCGTCTTCACCGG  
1611 TCGCGTTCTGAAACGCAGATGTGCCTCGCGCCGCACTGCTCCGAACAATAAAGATTCTACAATA  
1612 CTAGCTTTTTATGGTTATGAAGAGGAAAAATTGGCAGTAACCTGGCCCCACAAACCTTCAAATTAA  
1613 CGAATCAAATTAACAACCATAGGATGATAATGCGATTAGTTTTTTAGCCTTATTTCTGGGGTAATT  
1614 AATCAGCGAAGCGATGATTTTTGATCTATTAACAGATATATAAATGGAAAAGCTGCATAACCACT  
1615 TTAACTAATACTTTCAACATTTTCAGTTTGTATTACTTCTTATTCAAATGTCATAAAAGTATCAAC  
1616 AAAAAATTGTTAATATACCTCTATACTTTAACGTCAAGGAGTTAATTAA

1617 pCL10: *MET3* promoter

1618 GGATCCTTTAGTACTAACAGAGACTTTTGTCACTACTACATATAAGTGTACAAATATAGTACAGA  
1619 TATGACACACTTGTAGCGCAACGCGCATCCTACGGATTGCTGACAGAAAAAAGGTCACGTGAC  
1620 CAGAAAAGTCACGTGTAATTTTGTAACTCACCGCATTCTAGCGGTCCCTGTGCGTGCACACTGCACT  
1621 CAACACCATAAACCTTAGCAACCTCCAAAGGAAATCACCGTATAACAAAGCCACAGTTTTTACAAC  
1622 TTAGTCTCTTATGAAGTTACTTACCAATGAGAAATAGAGGCTCTTTCTCGAGAAATATGAATATG  
1623 GATATATATATATATATATATATATATATATATATATATATATATATGTAACCTTGGTTCTTTTTAGCTTGTG  
1624 ATCTCTAGCTTGGGTCTCTCTCTGTGCGTAACAGTTGTGATATCGTTTCTTAACAATTGAAAAGGAA  
1625 CTAAGAAAGTATAATAATAACAAGAATAAAGTATAATTAACATTAAATTAA

1626 pVG88: *ARG3* promoter

1627 GGATCCTCTTCTAAGAAAAAATATTTAGATCATATTATTTTAGATAACCGAGACATCGTTAGCAA  
1628 CCATGACTCCAGTAAACAAAAATTCAAGATCCAGAATATTTTGAACTCGACCTTCTAACATTACG  
1629 CTCCTTCGTATTACTCATTAGCTCTTCCTCTGATAGCAGTGAATTTTCGAGGGTCACGTGCGTAC  
1630 TCATATGCTTTCTTGTTCGGTTTCGTTTCGAGATGACAAAAAACTGGTCATTTTTTCCGTTAAGTGC  
1631 AACTCACAGCAGTATCGGCCGCTGAGAAATGCCCGGACAAAATTTTTTTGAGCCGGATTGGTCACC  
1632 GTTTTCTTTCTTCGGCGGGCTTCCCATTCCCGTCCATCCAAAAAAATCTACCTATATAAATCGACT  
1633 TTTCACCTCTAAAGGCAGTTTATTCCTTGTATGTCCTTTAAGTACAGTTAATAACGAGCAATTTTTT  
1634 TTTTTTTTTTTAGCCATCTACCCATCAACTTGTACACTCGTTACCTTAATTAA

1635 pVG107: Promoter used as a part of the Z<sub>3</sub>EV system

1636 GGATCCTTTTATATTGAATTTTCAAAAATCTTACTTTTTTTTTTTGGATGGACGCAAAGAAGTTTAAT  
1637 AATCATATTACATGGCATTACCACCATATACATATCCATATACATATCCATATCTAATCTTACTTA  
1638 TATGTTGTGGAATGTAAAGAGCCCCATTATCTTAGCCTAAAAAACCTTCTCTTTGGAACTTTCA  
1639 GTAATACGCTTAACTGCTCATTGCTATATTGAAGTGCGGCCGCGTGGGCGTGCGTGGGCGGGCGT  
1640 GGGCGTGCGTGGGCGGGCGTGGGCGTGCCTGGGCGTCTAGACCGTGCGTCCTCGTCTTCACCGGT  
1641 CGCGTTCCTGAAACGCAGATGTGCCTCGCGCCGCACTGCTCCGAACAATAAAGATTCTACAATAC  
1642 TAGCTTTTATGTTTATGAAGAGGAAAAATTGGCAGTAACCTGGCCCCACAAACCTTCAAATTAAC  
1643 GAATCAAATTAACAACCATAGGATGATAATGCGATTAGTTTTTTAGCCTTATTTCTGGGGTAATTA  
1644 ATCAGCGAAGCGATGATTTTTGATCTATTAACAGATATATAAATGGAAAAGCTGCATAACCACTT  
1645 TAACTAATACTTTCAACATTTTCAGTTTGTATTACTTCTTATTCAAATGTCATAAAAGTATCAACA  
1646 AAAAATTGTTAATATACCTCTATACTTTAACGTCAAGGAGAAAAAACTATACTCGAGTTAATTAA
